# Supplementary material for: Migraine and the risk of cardiovascular and cerebrovascular events: a meta-analysis of 16 cohort studies including 1 152 407 subjects
Source: PubMed Central journal article supplement — BMJ Open. 2018 Mar 27;8(3):e020498. doi: 10.1136/bmjopen-2017-020498 (PMC5875642; doi:10.1136/bmjopen-2017-020498), 2018-03-27

**Supplemental Table 1: Search strategy**

|                                                    |                                                                                                                                                                                                                                                                                                                                                                                                                                                                                                                                                                                                                                                                                                      |
|----------------------------------------------------|------------------------------------------------------------------------------------------------------------------------------------------------------------------------------------------------------------------------------------------------------------------------------------------------------------------------------------------------------------------------------------------------------------------------------------------------------------------------------------------------------------------------------------------------------------------------------------------------------------------------------------------------------------------------------------------------------|
| For PubMed                                         | <p>((("migraine disorders"[MeSH Terms] OR ("migraine"[All Fields] AND "disorders"[All Fields]) OR "migraine disorders"[All Fields] OR "migraine"[All Fields]) AND ("mortality"[Subheading] OR "mortality"[All Fields] OR "mortality"[MeSH Terms])) OR ((("migraine disorders"[MeSH Terms] OR ("migraine"[All Fields] AND "disorders"[All Fields]) OR "migraine disorders"[All Fields] OR "migraine"[All Fields]) AND ("stroke"[MeSH Terms] OR "stroke"[All Fields]))) OR ((("migraine disorders"[MeSH Terms] OR ("migraine"[All Fields] AND "disorders"[All Fields]) OR "migraine disorders"[All Fields] OR "migraine"[All Fields]) AND ("infarction"[MeSH Terms] OR "infarction"[All Fields])))</p> |
| For Cochrane Central Register of Controlled Trials | <p>#1: MeSH descriptor: [Migraine]<br/>         #2: MeSH descriptor: [Mortality]<br/>         #3: MeSH descriptor: [Stroke]<br/>         #4: MeSH descriptor: [Infarction]<br/>         #5: #1 and (#2 or #3 or #4)</p>                                                                                                                                                                                                                                                                                                                                                                                                                                                                              |

MeSH = Medical subject heading

## **Supplemental material: quality assessment tool by the Newcastle-Ottawa scale**

### **Selection:**

- 1: Are cases truly representative or somewhat representative of population? (Yes \*/No)
- 2: Are cases drawn from the same population? (Yes \*/No)
- 3: How was diagnosis of migraine ascertained? (Health records or physician diagnosis \*/self diagnosis)
- 4: Did the study demonstrate that outcome of interest was not present at the beginning of the study? (Yes\*/No)

### **Comparability:**

Did the study adjust for possible confounders in statistical analysis?

- 1: Age and Gender\*
- 2: other additional factors\*

### **Outcome**

- 1: How was the outcome assessed? (Health records, physician diagnosis, imaging\*/self report or not reported)
- 2: Was follow up duration long enough (>6 months)? (Yes\*/No)
- 3: How was completeness of follow up? (>80%\*/<80%)

**Supplemental Table 2:** Quality of included studies by Newcastle-Ottawa scale.

| Study [Ref.]                 | Selection | Comparability | Outcome | Quality |
|------------------------------|-----------|---------------|---------|---------|
| Waters et al [8]             | **        |               | ***     | Low     |
| Sternfeld et al [40]         | **        | **            | **      | Low     |
| Merikangas et al [38]        | **        | *             | ***     | Low     |
| Hall et al [34]              | ****      | *             | ***     | High    |
| Velentgas et al [37]         | ****      | **            | ***     | High    |
| Kurth et al (WHS)<br>[21,22] | ***       | **            | ***     | High    |
| Kurth et al (PHS) [7,39]     | ***       | **            | ***     | High    |
| Gudmundsson et al [33]       | ***       | **            | ***     | High    |
| Kuo et al [35]               | ****      | **            | ***     | High    |
| Wang et al [32]              | ****      | **            | **      | High    |
| Åsberg et al [5]             | **        | **            | ***     | High    |
| Peng et al [36]              | ****      | **            | ***     | High    |
| Kurth et al (NHS) [12]       | ****      | **            | ***     | High    |
| Androulakis et al [11]       | ***       | **            | **      | High    |
| Rambarat et al [6]           | *         | **            | ***     | Low     |
| Lantz et al [41]             | **        | **            | ***     | High    |

A study with 7 or more stars out of 9 was considered a high quality study

WHS: Women's Health Study, PHS: Physician's Health Study, NHS: Nurses' Health Study

**Supplemental Table 3:** Variables adjusted for the hazard ratio reported in each study included

| Study [Ref.]              | Age | HTN | DM | BMI | Smoking | Alcohol | Exercise | Post-menopausal | OCP | HPL | FH of premature CAD | Aspirin |
|---------------------------|-----|-----|----|-----|---------|---------|----------|-----------------|-----|-----|---------------------|---------|
| Waters et al [8]          | X   |     |    |     | X       |         |          |                 |     |     |                     |         |
| Sternfeld et al [40]      | X   | X   | X  | X   |         |         |          |                 |     | X   |                     |         |
| Merikangas et al [38]     | X   | X   | X  |     |         |         |          |                 |     |     |                     |         |
| Hall et al [34]           | X   | X   | X  | X   | X       |         |          |                 | X   | X   |                     |         |
| Velentgas et al [37]      | X   | X   | X  | X   |         |         |          |                 | X   | X   |                     |         |
| Kurth et al (WHS) [21,22] | X   | X   | X  | X   | X       | X       | X        | X               | X   | X   | X                   | X       |
| Kurth et al (PHS) [7,39]  | X   | X   | X  | X   | X       | X       | X        |                 |     | X   | X                   |         |
| Gudmundsson et al [33]    | X   | X   | X  | X   | X       |         |          |                 | X   | X   |                     |         |
| Kuo et al [35]            | X   | X   | X  | X   |         |         |          |                 |     | X   |                     | X       |
| Wang et al [32]           | X   | X   | X  | X   |         |         |          |                 |     | X   |                     |         |
| Åsberg et al [5]          | X   | X   | X  | X   | X       | X       | X        |                 |     | X   |                     |         |
| Peng et al [36]           | X   | X   | X  | X   |         |         |          |                 |     | X   |                     |         |
| Kurth et al (NHS) [12]    | X   | X   | X  | X   | X       | X       | X        | X               | X   | X   | X                   | X       |
| Androulakis et al [11]    | X   | X   | X  | X   | X       | X       | X        |                 |     | X   |                     |         |
| Rambarat et al [6]        | X   | X   | X  | X   | X       |         |          |                 |     | X   | X                   | X       |
| Lantz et al [41]          | X   | X   | X  | X   | X       |         |          |                 |     | X   |                     |         |

\* Adjusted by propensity score matching for chronic renal disease, chronic liver disease, valvular heart disease, smoking, atrial fibrillation, myocardial infarction, and peripheral vascular disease.

HTN: Hypertension, DM: Diabetes mellitus, BMI: Body mass index, OCP: Oral contraceptive pills, HPL: hyperlipidemia, FH: family history, CAD: coronary artery disease, WHS: Women's Health Study, PHS: Physician's Health Study, NHS: Nurses' Health Study

**Supplemental Table 4:** Methods of assessment of migraine status in study participants

| <b>Study [Ref.]</b>       | <b>Method of assessment</b>                                                                          |
|---------------------------|------------------------------------------------------------------------------------------------------|
| Waters et al [8]          | Questionnaire: Self-reporting symptoms                                                               |
| Sternfeld et al [40]      | Cohort 1: Questionnaire self-reporting symptoms<br>Cohort 2: Questionnaire about physician diagnosis |
| Merikangas et al [38]     | Not reported                                                                                         |
| Hall et al [34]           | Health records (physician diagnosis)                                                                 |
| Velentgas et al [37]      | Health records (physician diagnosis)                                                                 |
| Kurth et al (WHS) [21,22] | Questionnaire self-reporting symptoms                                                                |
| Kurth et al (PHS) [7,39]  | Questionnaire self-reporting symptoms                                                                |
| Gudmundsson et al [33]    | Questionnaire self-reporting symptoms                                                                |
| Kuo et al [35]            | Health records (physician diagnosis)                                                                 |
| Wang et al [32]           | Health records (physician diagnosis)                                                                 |
| Åsberg et al [5]          | Questionnaire self-reporting symptoms                                                                |
| Peng et al [36]           | Health records (physician diagnosis)                                                                 |
| Kurth et al (NHS) [12]    | Questionnaire about physician diagnosis                                                              |
| Androulakis et al [11]    | Questionnaire self-reporting symptoms                                                                |
| Rambarat et al [6]        | Questionnaire self-reporting symptoms                                                                |
| Lantz et al [41]          | Questionnaire self-reporting symptoms                                                                |

WHS: Women's Health Study, PHS: Physician's Health Study, NHS: Nurses' Health Study

**Supplemental Table 5:** Baseline patient characteristics of the included studies

| Study [Ref.]              | Age,% | Female,<br>% | Hypertension,<br>% | DM,%  | Hyperlipidemia,<br>% | Smoker,<br>% | BMI,<br>kg/m <sup>2</sup> | Aura,% |
|---------------------------|-------|--------------|--------------------|-------|----------------------|--------------|---------------------------|--------|
| Waters et al [8]          | NR/NR | 100/100      | NR/NR              | NR/NR | NR/NR                | NR/NR        | NR/NR                     | NR     |
| Sternfeld et al [40]      | 39/42 | 76/52        | NR/NR              | NR/NR | NR/NR                | 38/30        | 25/25                     | NR     |
| Merikangas et al [38]     | NR/NR | 84/58        | NR/NR              | NR/NR | NR/NR                | NR/NR        | NR/NR                     | NR     |
| Hall et al [34]           | NR/NR | NR/NR        | NR/NR              | NR/NR | NR/NR                | NR/NR        | NR/NR                     | NR     |
| Velentgas et al [37]      | 38/38 | 76/76        | 22/10              | 2/2   | 8/5                  | NR/NR        | NR/NR                     | NR     |
| Kurth et al (WHS) [21,22] | 54/55 | 100/100      | 27/25              | 2/3   | 3/3                  | 11/12        | 26/26                     | 28     |
| Kurth et al (PHS) [7,39]  | 57/58 | 0/0          | 34/31              | 3/4   | 11/10                | 6/7          | 25/25                     | NR     |
| Gudmundsson et al [33]    | 51/54 | 72/46        | 9/9                | 4/4   | NR/NR                | 48/48        | 25/26                     | 69     |
| Kuo et al [35]            | 43/43 | 70/70        | 16/12              | 6/6   | 8/5                  | NR/NR        | NR/NR                     | 8.8    |
| Wang et al [32]           | 32/32 | 71/71        | 3/3                | 1/1   | 2/2                  | NR/NR        | NR/NR                     | NR     |
| Åsberg et al [5]          | 44/53 | 72/47        | NR/NR              | NR/NR | NR/NR                | 31/25        | 26/26                     | 14     |
| Peng et al [36]           | 41/41 | 72/72        | 17/17              | 7/7   | 13/13                | NR/NR        | NR/NR                     | 12     |
| Kurth et al (NHS) [12]    | 35/34 | 100/100      | 9/5                | 1/1   | 15/10                | 15/13        | NR/NR                     | NR/NR  |
| Androulakis et al [11]    | 59/60 | 77/51        | 40/40              | 8/10  | 77/78                | 53/50        | NR/NR                     | 29     |
| Rambarat et al [6]        | 54/59 | 100/100      | 57/59              | 19/26 | 49/57                | 24/19        | NR/NR                     | NR/NR  |
| Lantz et al [41]          | 44/46 | 76/50        | 19/14              | 2/2   | 6/8                  | 18/18        | NR/NR                     | 41     |

Data is reported as Migraine/non-migraine arms.

DM: Diabetes Mellitus, BMI: Body mass index, CAD: Coronary artery disease, NR: Not reported

WHS: Women's Health Study, PHS: Physician's Health Study, NHS: Nurses' Health Study

**Supplemental Table 6:** Major adverse cardiac and cerebrovascular event definitions in included studies

| <b>Study [Ref.]</b>       | <b>Non-fatal stroke</b> | <b>Non-fatal myocardial infarction</b> | <b>Congestive heart failure</b> | <b>Death due to cardiovascular disease</b> |
|---------------------------|-------------------------|----------------------------------------|---------------------------------|--------------------------------------------|
| Kurth et al (WHS) [21,22] | X                       | X                                      |                                 | X                                          |
| Kurth et al (PHS) [7,39]  | X                       | X                                      |                                 | X                                          |
| Kurth et al (NHS) [12]    | X                       | X                                      |                                 | X                                          |
| Rambarat et al [6]        | X                       | X                                      | X                               | X                                          |

WHS: Women's Health Study, PHS: Physician's Health Study, NHS: Nurses' Health Study

**Supplemental Table 7: GRADE assessment tool for quality of evidence**

| № of studies                                                                        | Quality assessment    |              |                          |              |             |                                                                         | Effect            |                    |                                                 | Quality      | Importance |
|-------------------------------------------------------------------------------------|-----------------------|--------------|--------------------------|--------------|-------------|-------------------------------------------------------------------------|-------------------|--------------------|-------------------------------------------------|--------------|------------|
|                                                                                     | Study design          | Risk of bias | Inconsistency            | Indirectness | Imprecision | Other considerations                                                    | № of events       | № of individuals   | HR (95% CI)                                     |              |            |
| <b>Major adverse cardiac and cerebrovascular event (follow up: mean 18.5 years)</b> |                       |              |                          |              |             |                                                                         |                   |                    |                                                 |              |            |
| 4                                                                                   | observational studies | not serious  | not serious <sup>a</sup> | not serious  | not serious | all plausible residual confounding would reduce the demonstrated effect | 332 <sup>b</sup>  | 24329 <sup>b</sup> | 1.42 per Adjusted HR (1.26 to 1.6) <sup>b</sup> | ⊕⊕⊕⊕<br>HIGH |            |
| <b>All-cause mortality (follow up: mean 4.9 years)</b>                              |                       |              |                          |              |             |                                                                         |                   |                    |                                                 |              |            |
| 6                                                                                   | observational studies | not serious  | not serious <sup>a</sup> | not serious  | not serious | all plausible residual confounding would reduce the demonstrated effect | 2695 <sup>b</sup> | 203669             | 0.93 per Adjusted HR (0.78 to 1.1)              | ⊕⊕⊕⊕<br>HIGH |            |
| <b>cardiovascular mortality (follow up: mean 9.3 years)</b>                         |                       |              |                          |              |             |                                                                         |                   |                    |                                                 |              |            |
| 9                                                                                   | observational studies | not serious  | not serious <sup>a</sup> | not serious  | not serious | all plausible residual confounding would reduce the demonstrated effect | 904 <sup>b</sup>  | 226621             | 1.04 per adjusted HR (0.89 to 1.23)             | ⊕⊕⊕⊕<br>HIGH |            |
| <b>Myocardial infarction (follow up: mean 8.8 years)</b>                            |                       |              |                          |              |             |                                                                         |                   |                    |                                                 |              |            |
| 7                                                                                   | observational studies | not serious  | not serious <sup>a</sup> | not serious  | not serious | all plausible residual confounding would reduce the demonstrated effect | 787 <sup>b</sup>  | 229456             | 1.23 per adjusted HR (1.03 to 1.43)             | ⊕⊕⊕⊕<br>HIGH |            |
| <b>Stroke (follow up: mean 5.8 years)</b>                                           |                       |              |                          |              |             |                                                                         |                   |                    |                                                 |              |            |
| 13                                                                                  | observational studies | not serious  | not serious <sup>a</sup> | not serious  | not serious | all plausible residual confounding would reduce the demonstrated effect | 1972 <sup>b</sup> | 386483             | 1.42 per adjusted HR (1.25 to 1.61)             | ⊕⊕⊕⊕<br>HIGH |            |

a. As the heterogeneity was explained by our subgroup analysis and meta-regression.

b. Nurse's Health Study did not report number of events separately in each group



**Supplemental Table 8:** Assessment of the outcome of stroke among the included studies

| <b>Study [Ref.]</b>       | <b>Assessment of the outcome of stroke</b>                                                     |
|---------------------------|------------------------------------------------------------------------------------------------|
| Merikangas et al [38]     | Self-reported physician diagnosis of the condition                                             |
| Hall et al [34]           | Identification with ICD-9 codes                                                                |
| Velentgas et al [37]      | Identification with ICD-9 codes                                                                |
| Kurth et al (WHS) [21,22] | Self-reported on follow up questionnaires then confirmed by medical record review by physician |
| Kurth et al (PHS) [7,39]  | Follow up questionnaires then confirmed by medical records review                              |
| Gudmundsson et al [33]    | Identification with ICD-9 and 10 codes                                                         |
| Kuo et al [35]            | Identification with ICD-9 codes                                                                |
| Wang et al [32]           | Identification with ICD-9 codes                                                                |
| Åsberg et al [5]          | Identification with ICD-10 codes                                                               |
| Peng et al [36]           | Hospitalizations claims (accuracy validated prior study to be 94%)                             |
| Kurth et al (NHS) [12]    | Self-reported on follow up questionnaires then confirmed by medical record review by physician |
| Androulakis et al [11]    | Reviewing reports of CT or MRI brain imaging                                                   |
| Rambarat et al [6]        | Follow up phone interviews, and confirmed by reaching the referring physician.                 |
| Lantz et al [41]          | Identification with ICD-9 codes                                                                |

ICD: International Classification of Disease, WHS: Women's Health Study, PHS: Physician's Health Study, NHS: Nurses' Health Study

**Supplemental Table 9:** Myocardial infarction definitions in included studies.

| <b>Study [Ref.]</b>       | <b>Definition of myocardial infarction</b>                                                                                                           |
|---------------------------|------------------------------------------------------------------------------------------------------------------------------------------------------|
| Sternfeld et al [40]      | Identification with ICD-9 codes                                                                                                                      |
| Hall et al [34]           | Identification with ICD-9 codes                                                                                                                      |
| Velentgas et al [37]      | Identification with ICD-9 codes                                                                                                                      |
| Kurth et al (WHS) [21,22] | Occurrence of typical symptoms by World Health Organization definition, in addition to diagnostic electrocardiographic or cardiac enzymes elevation. |
| Kurth et al (PHS) [7,39]  | Occurrence of typical symptoms by World Health Organization definition, in addition to diagnostic electrocardiographic or cardiac enzymes elevation. |
| Kurth et al (NHS) [12]    | Occurrence of typical symptoms by World Health Organization definition, in addition to diagnostic electrocardiographic or cardiac enzymes elevation. |
| Rambarat et al [6]        | Asking patients about MI diagnosis, then confirming by contacting the referring physician or obtaining health records                                |

ICD: International Classification of Disease, WHS: Women's Health Study, PHS: Physician's Health Study, NHS: Nurses' Health Study

**Supplemental Figure 1:** Funnel plot of major adverse cardiac and cerebrovascular events (MACCE)

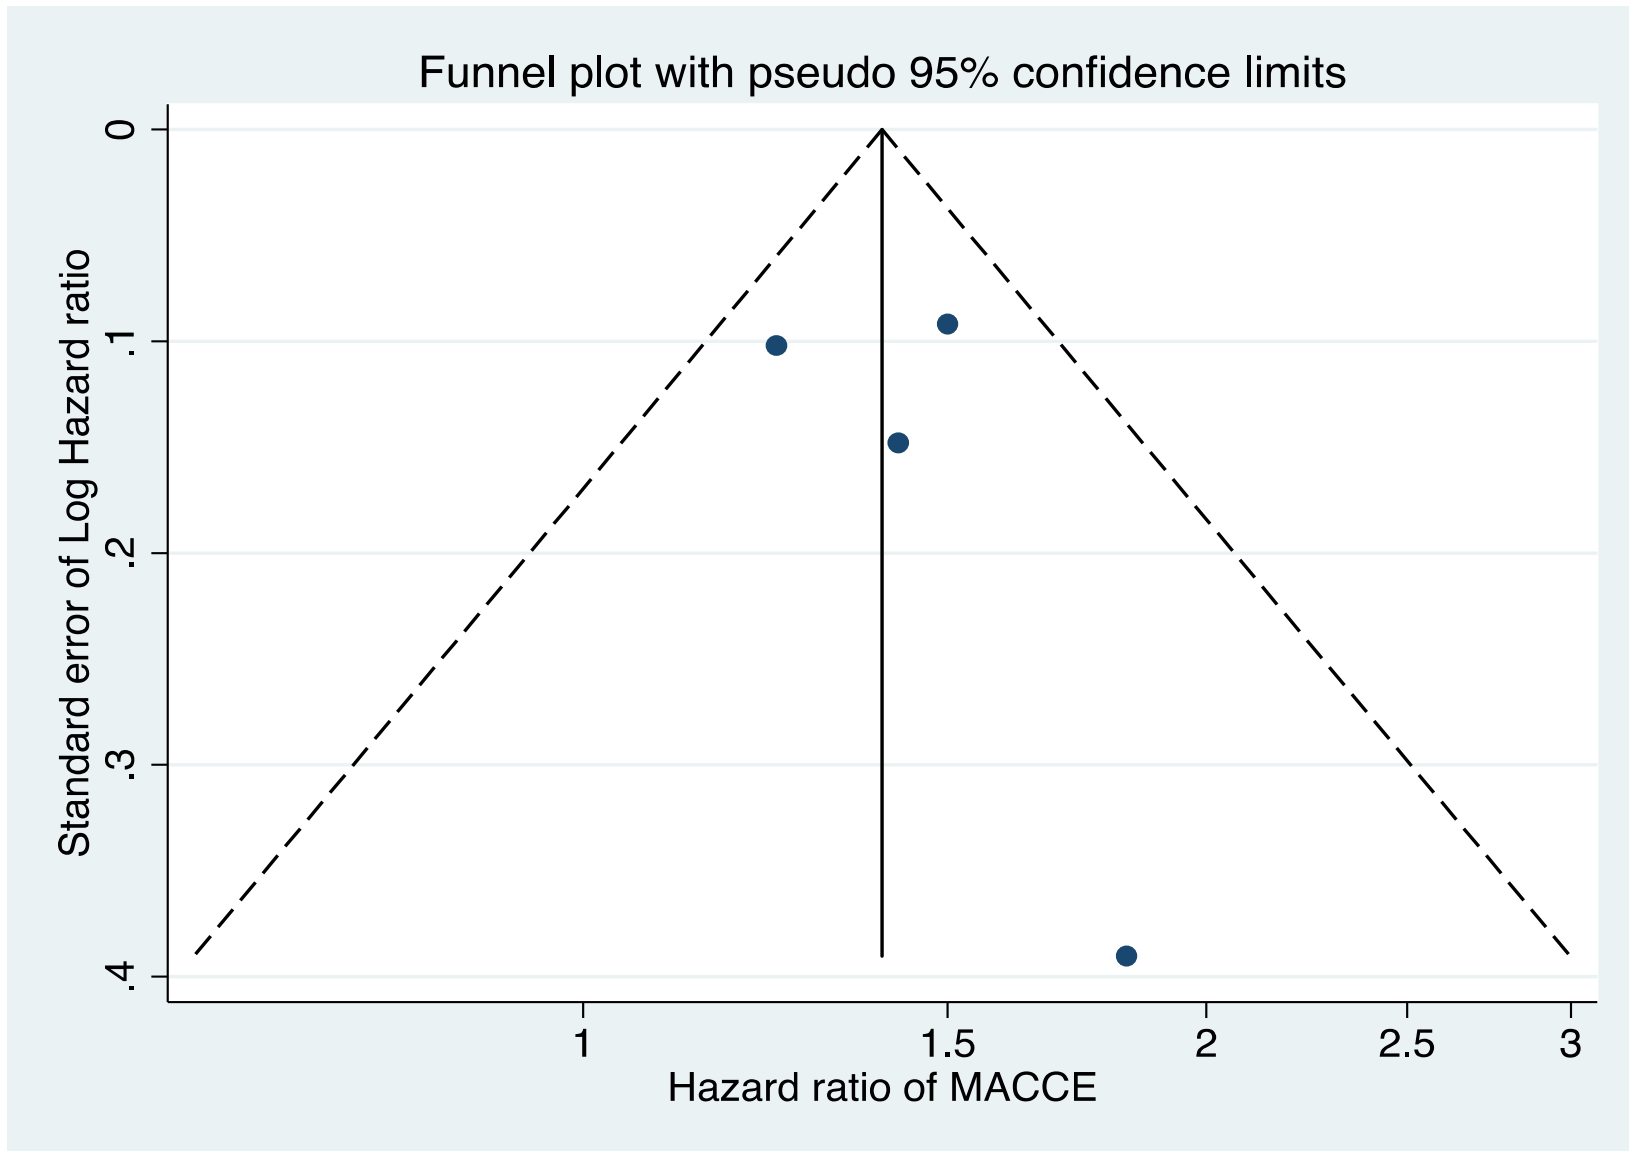

**Supplemental Figure 2:** Random effects summary adjusted hazard ratio of major adverse cardiovascular and cerebrovascular events

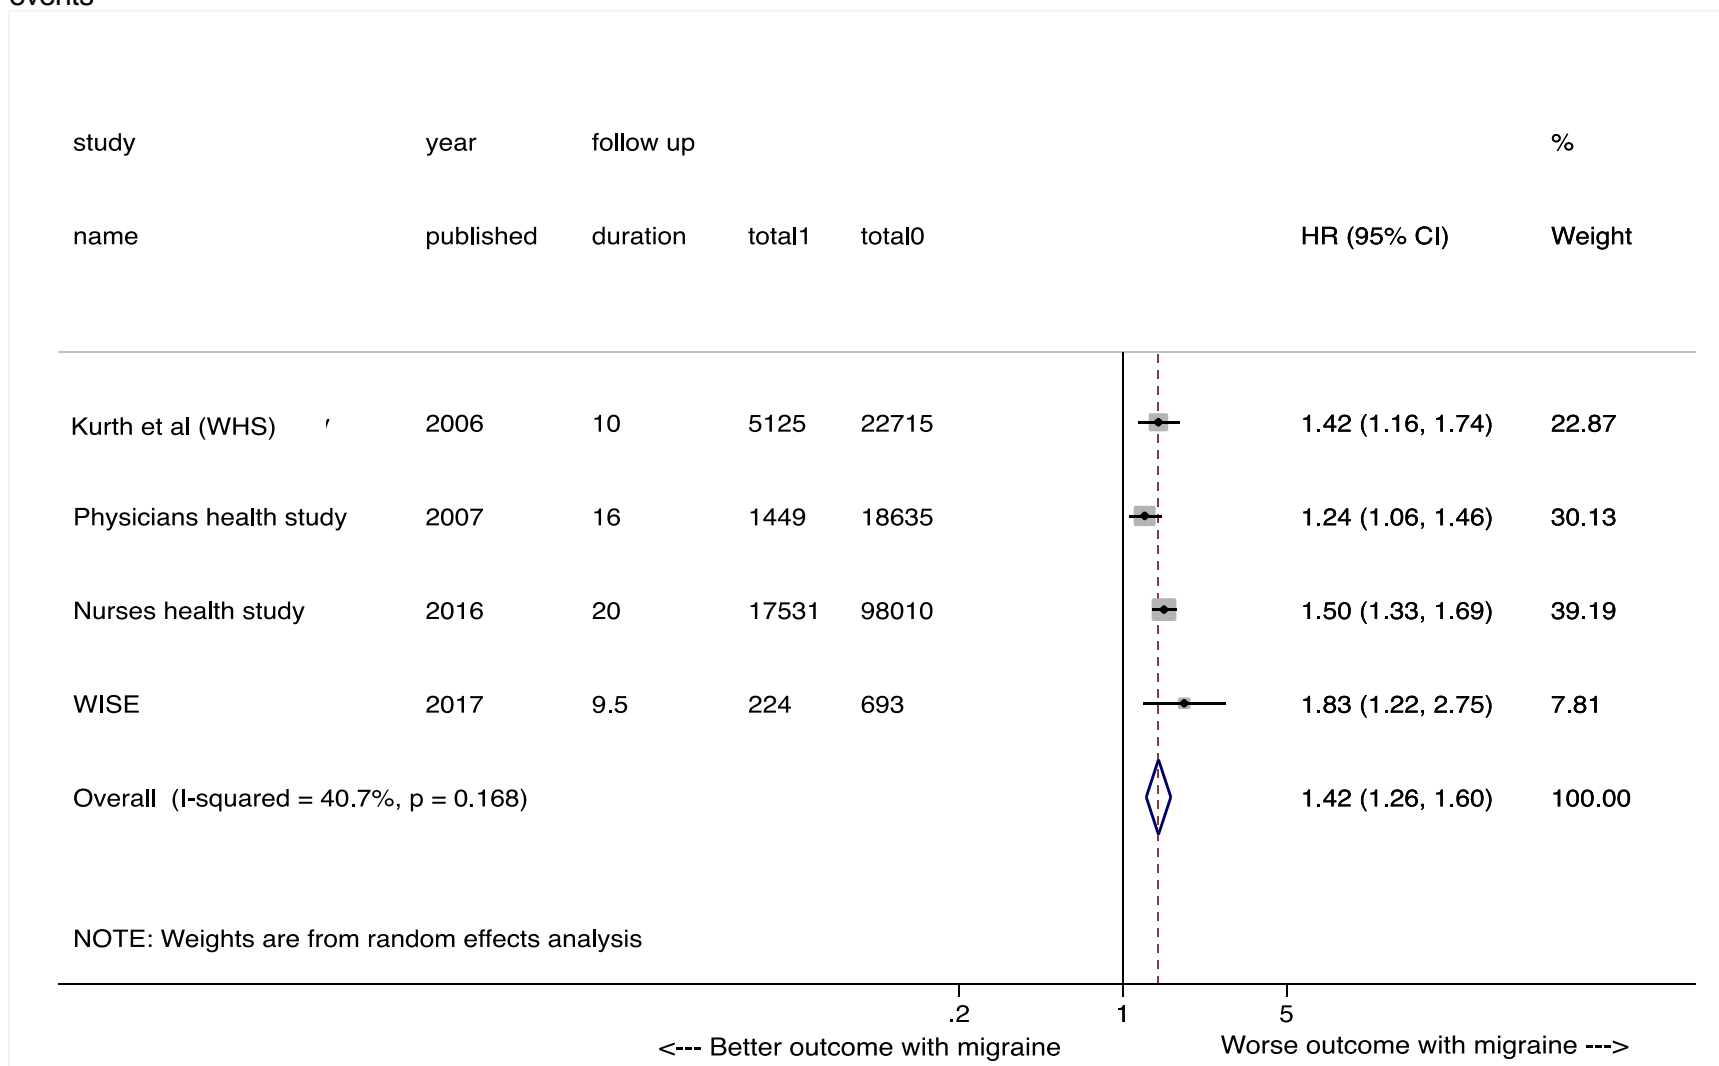

**Supplemental Figure 3:** Random effects meta-regression analysis of major adverse cardiac and cerebrovascular events by the duration of follow-up of each study

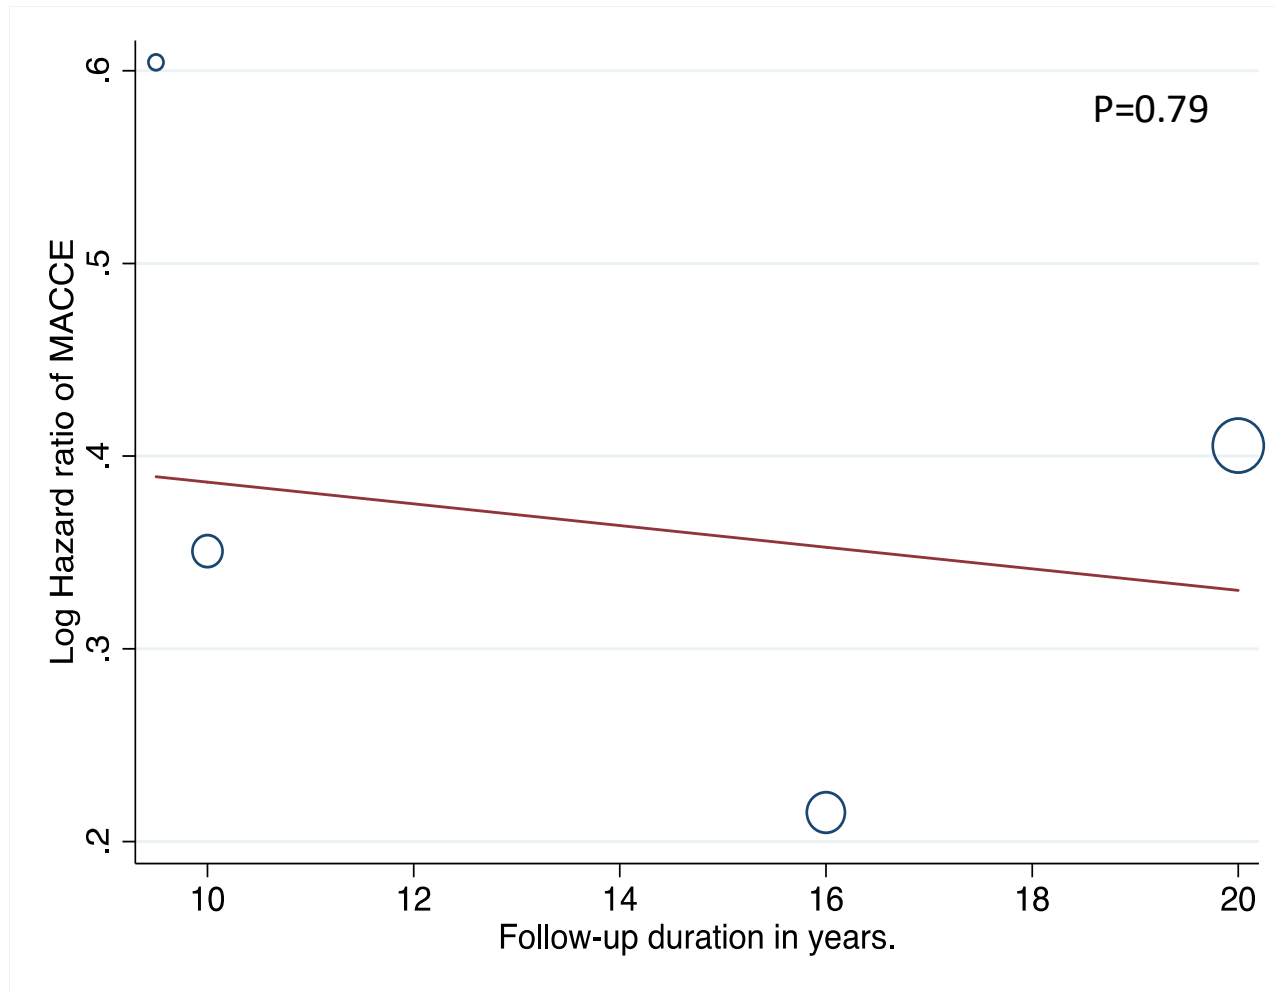

Supplemental Figure 4: Funnel plot of stroke

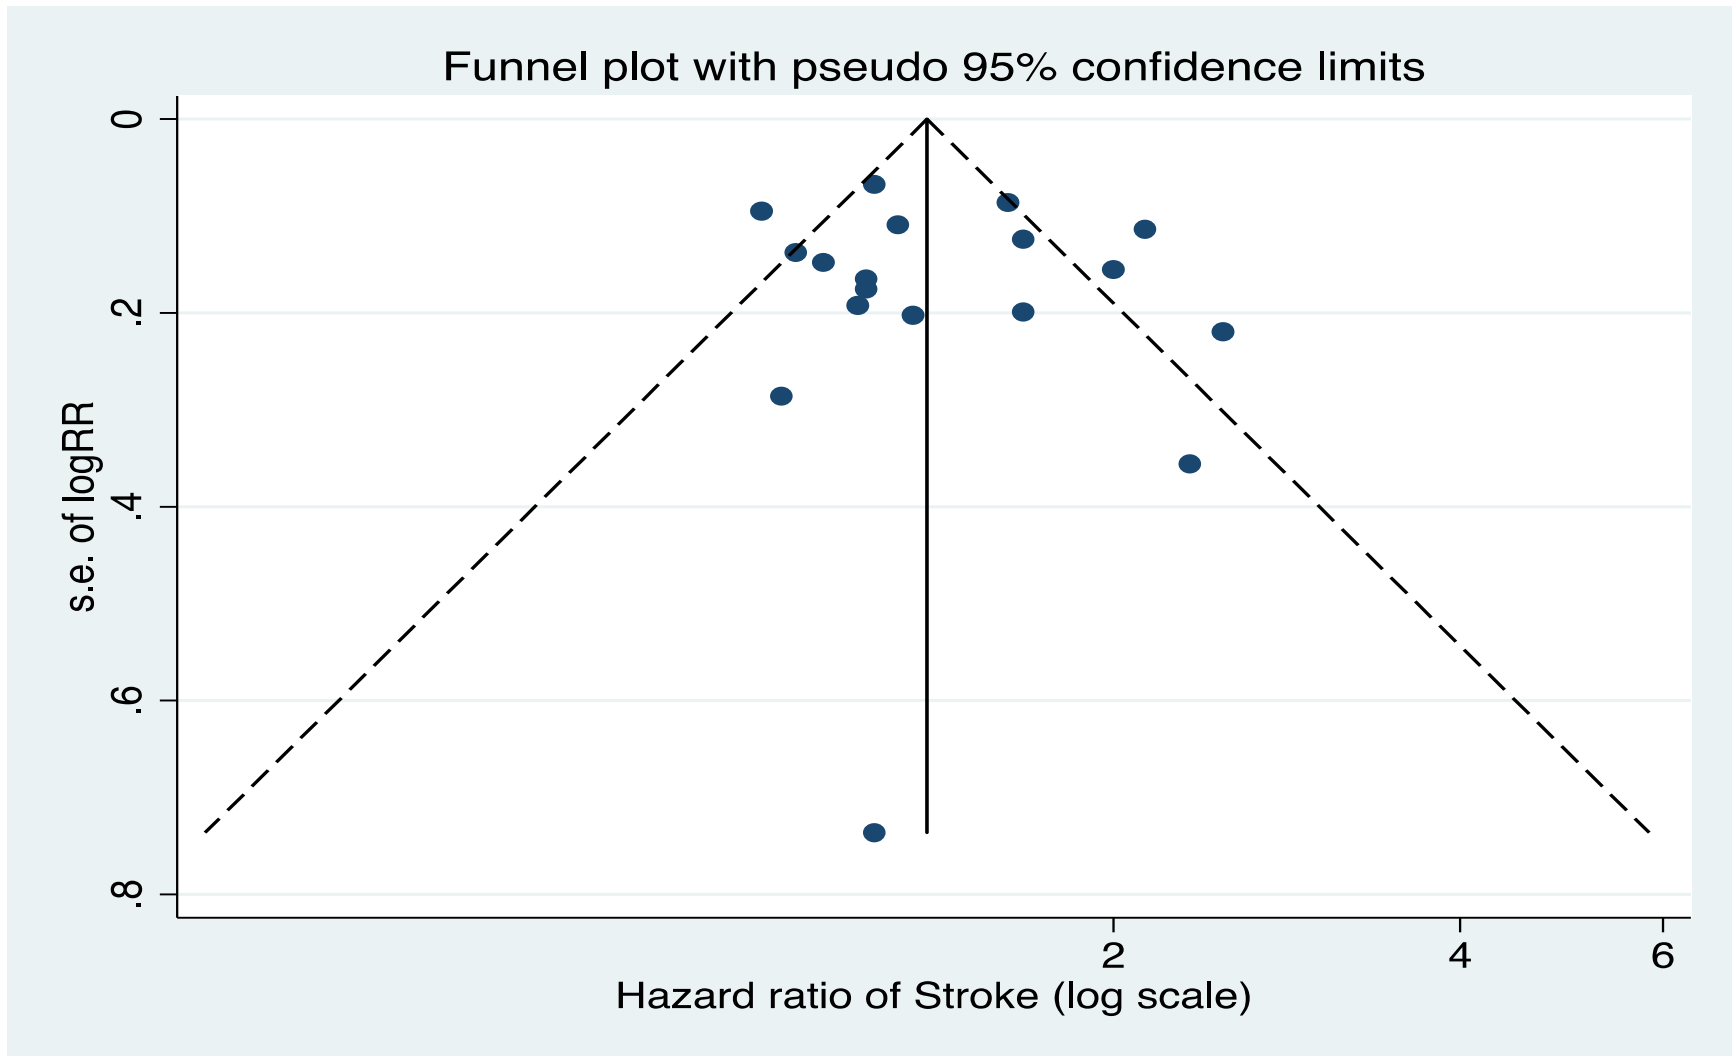

**Supplemental Figure 5:** Random effects meta-regression analysis of stroke by the duration of follow-up of each study

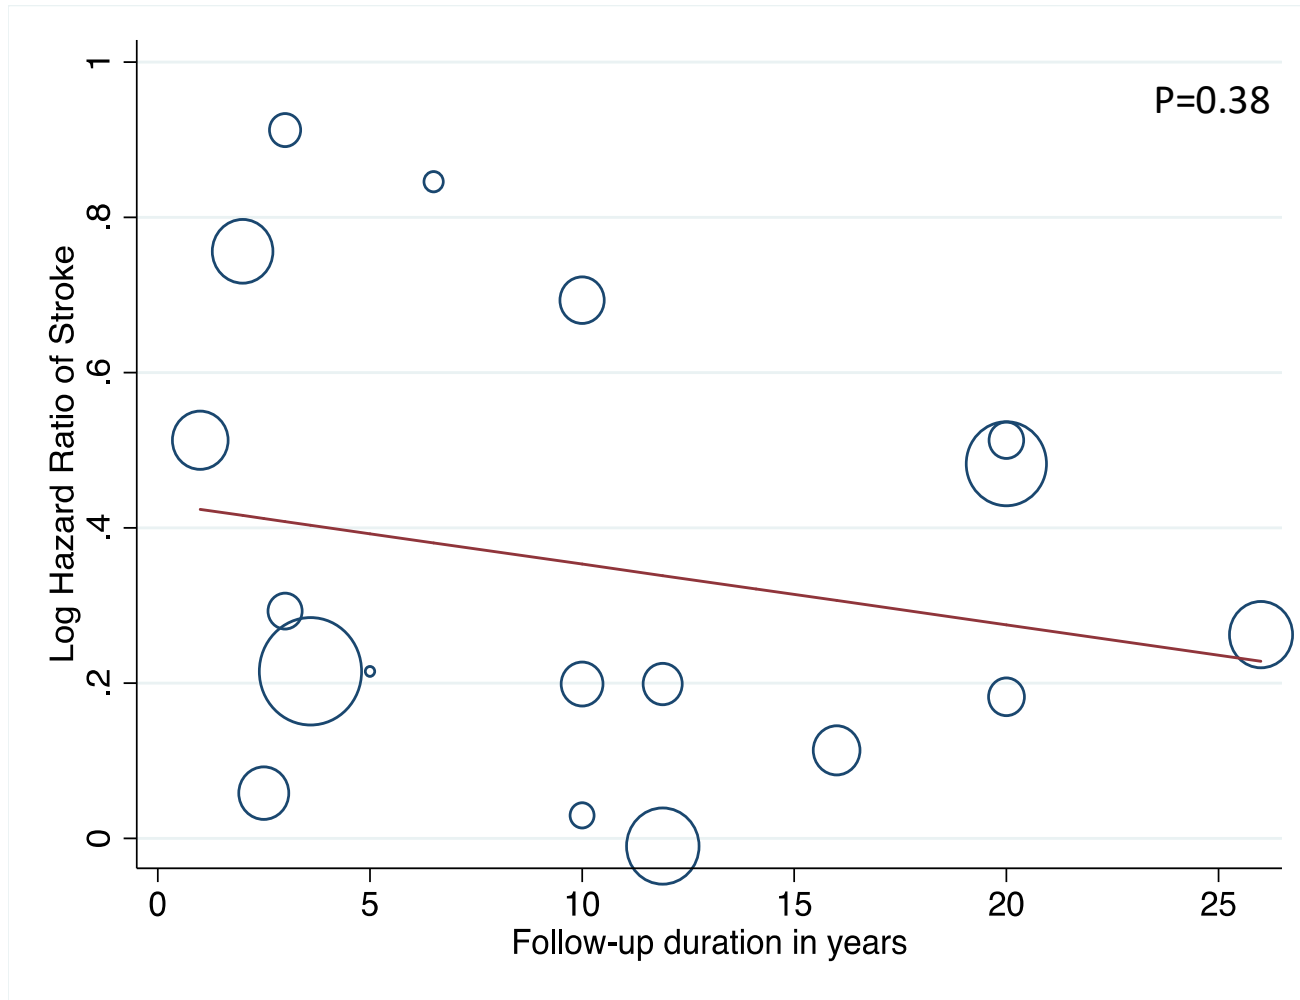

Supplemental Figure 6: Funnel plot of myocardial infarction.

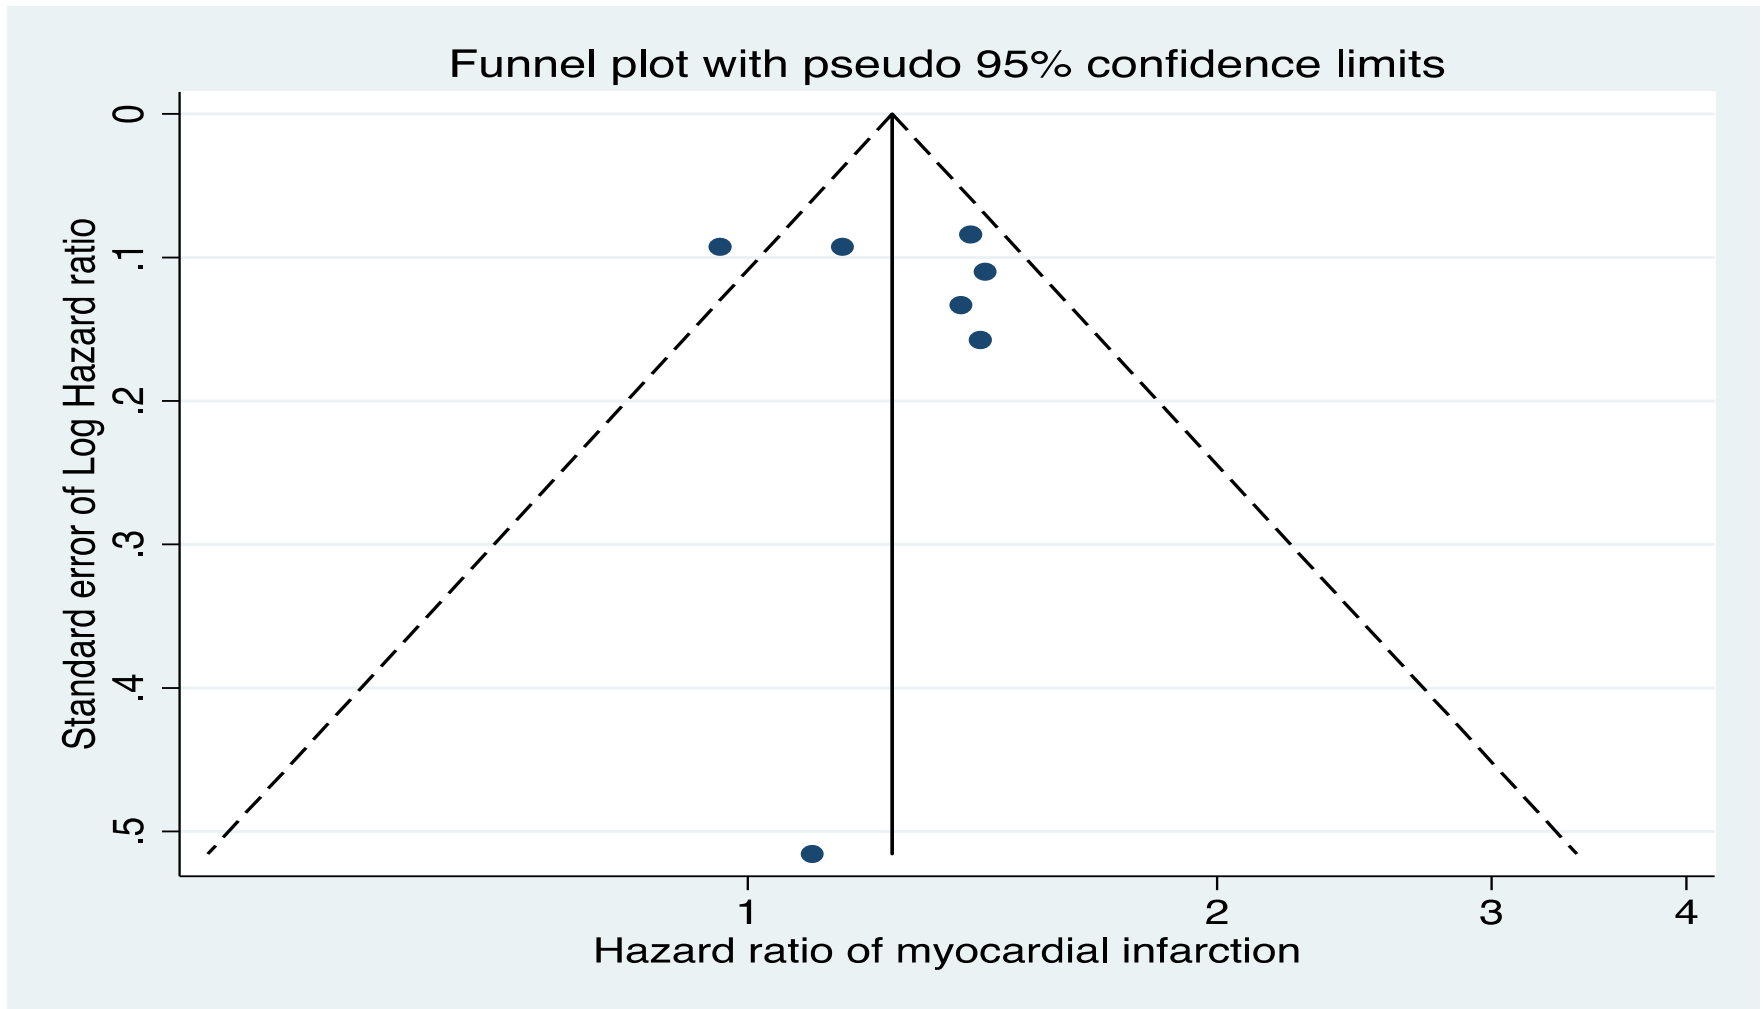

**Supplemental Figure 7:** Random effects summary adjusted hazard ratio of myocardial infarction.

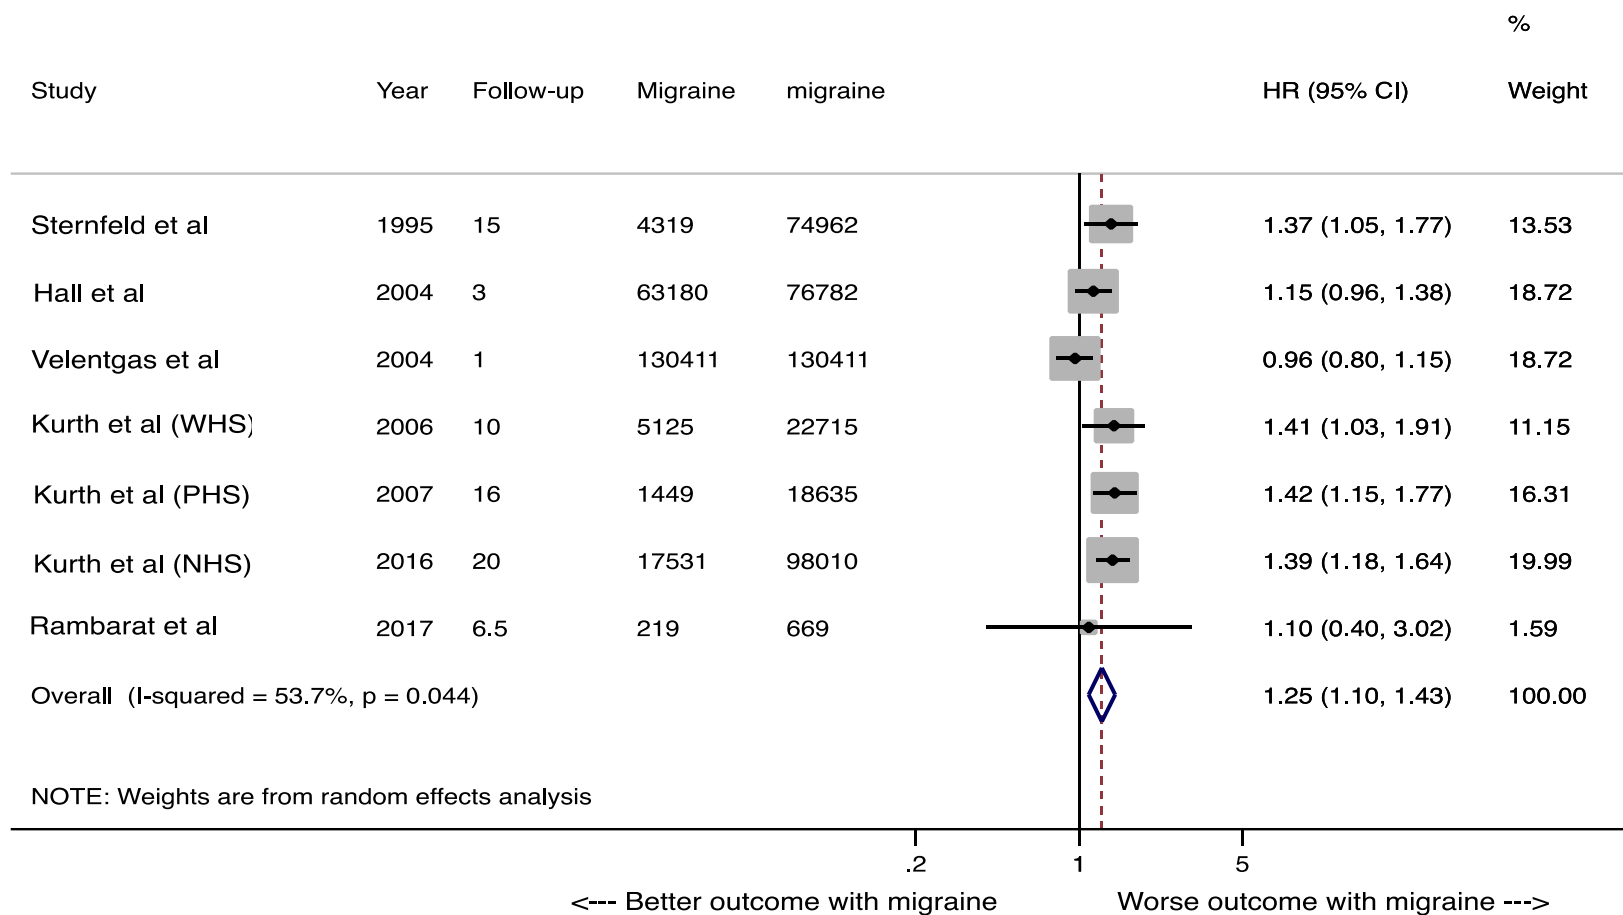

NOTE: Weights are from random effects analysis



**Supplemental Figure 8:** Random effects meta-regression analysis of myocardial infarction by the duration of follow-up of each study

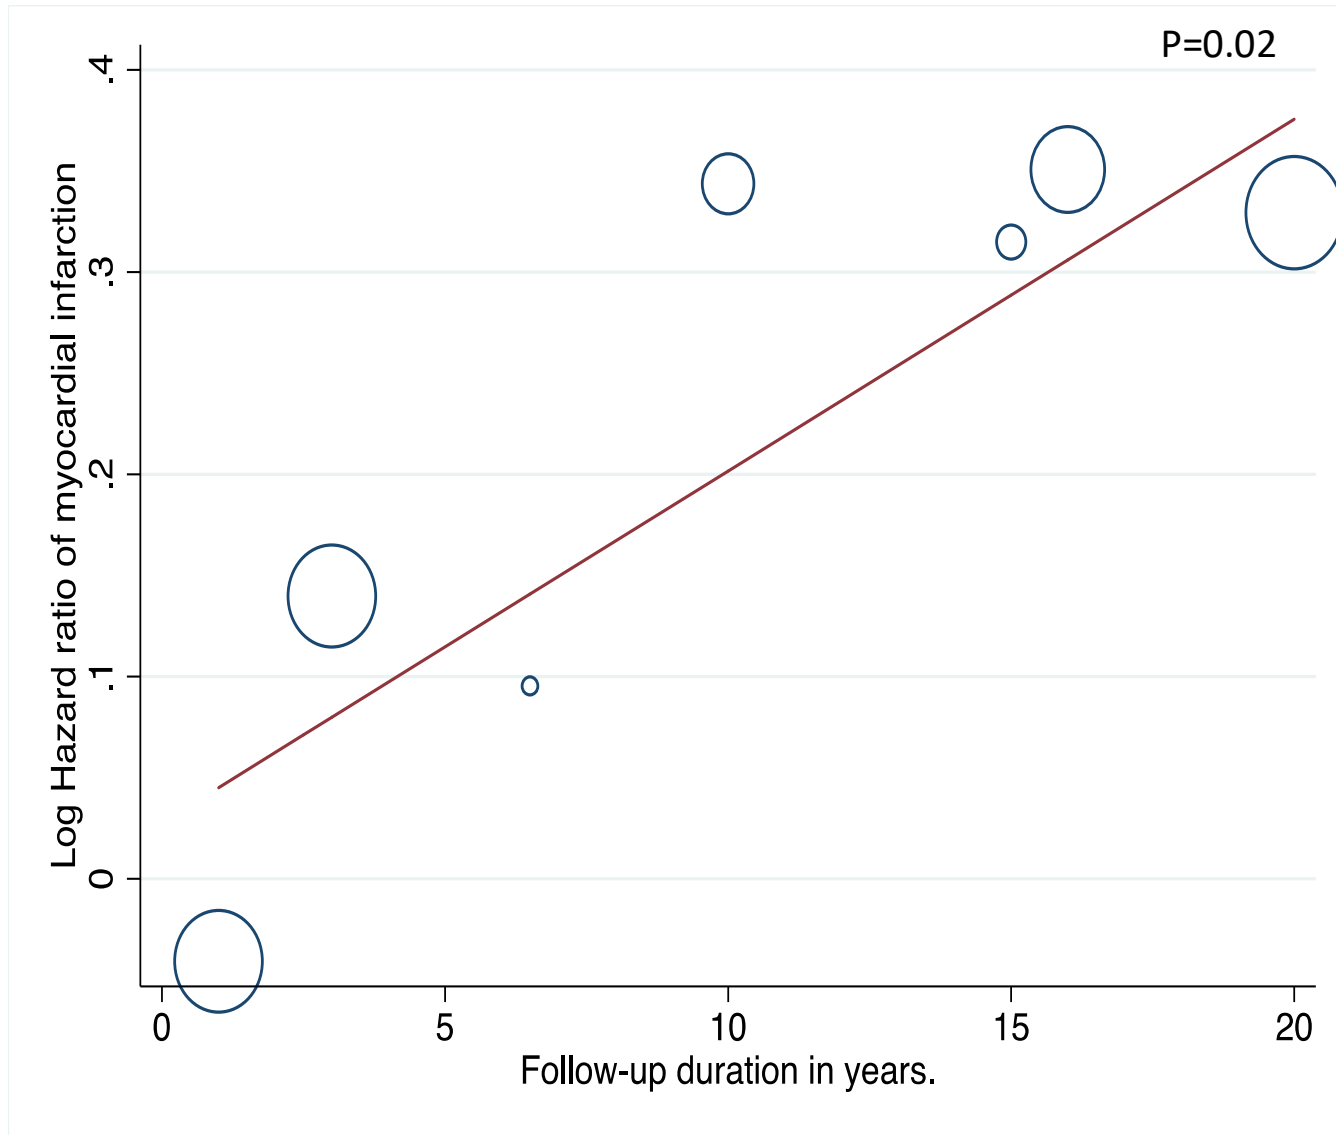

Supplemental Figure 9: Funnel plot of all-cause mortality.

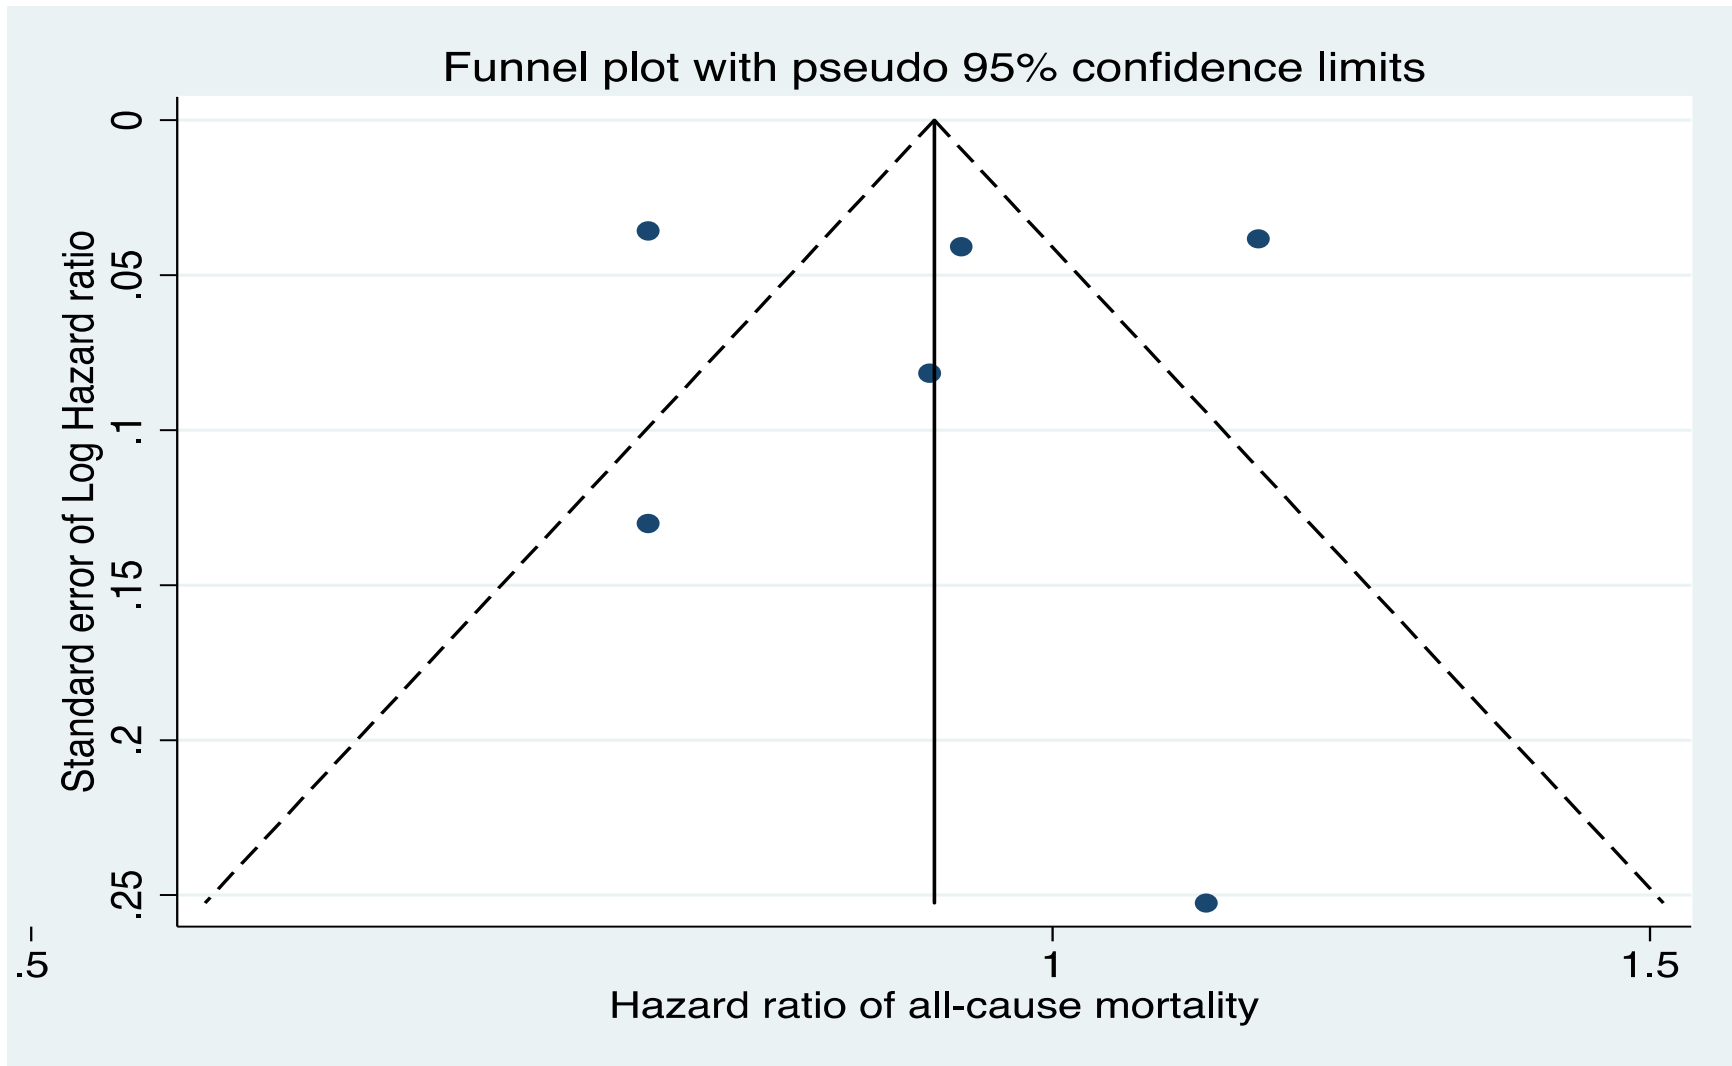

**Supplemental Figure 10:** Random effects summary adjusted hazard ratio of all-cause mortality.

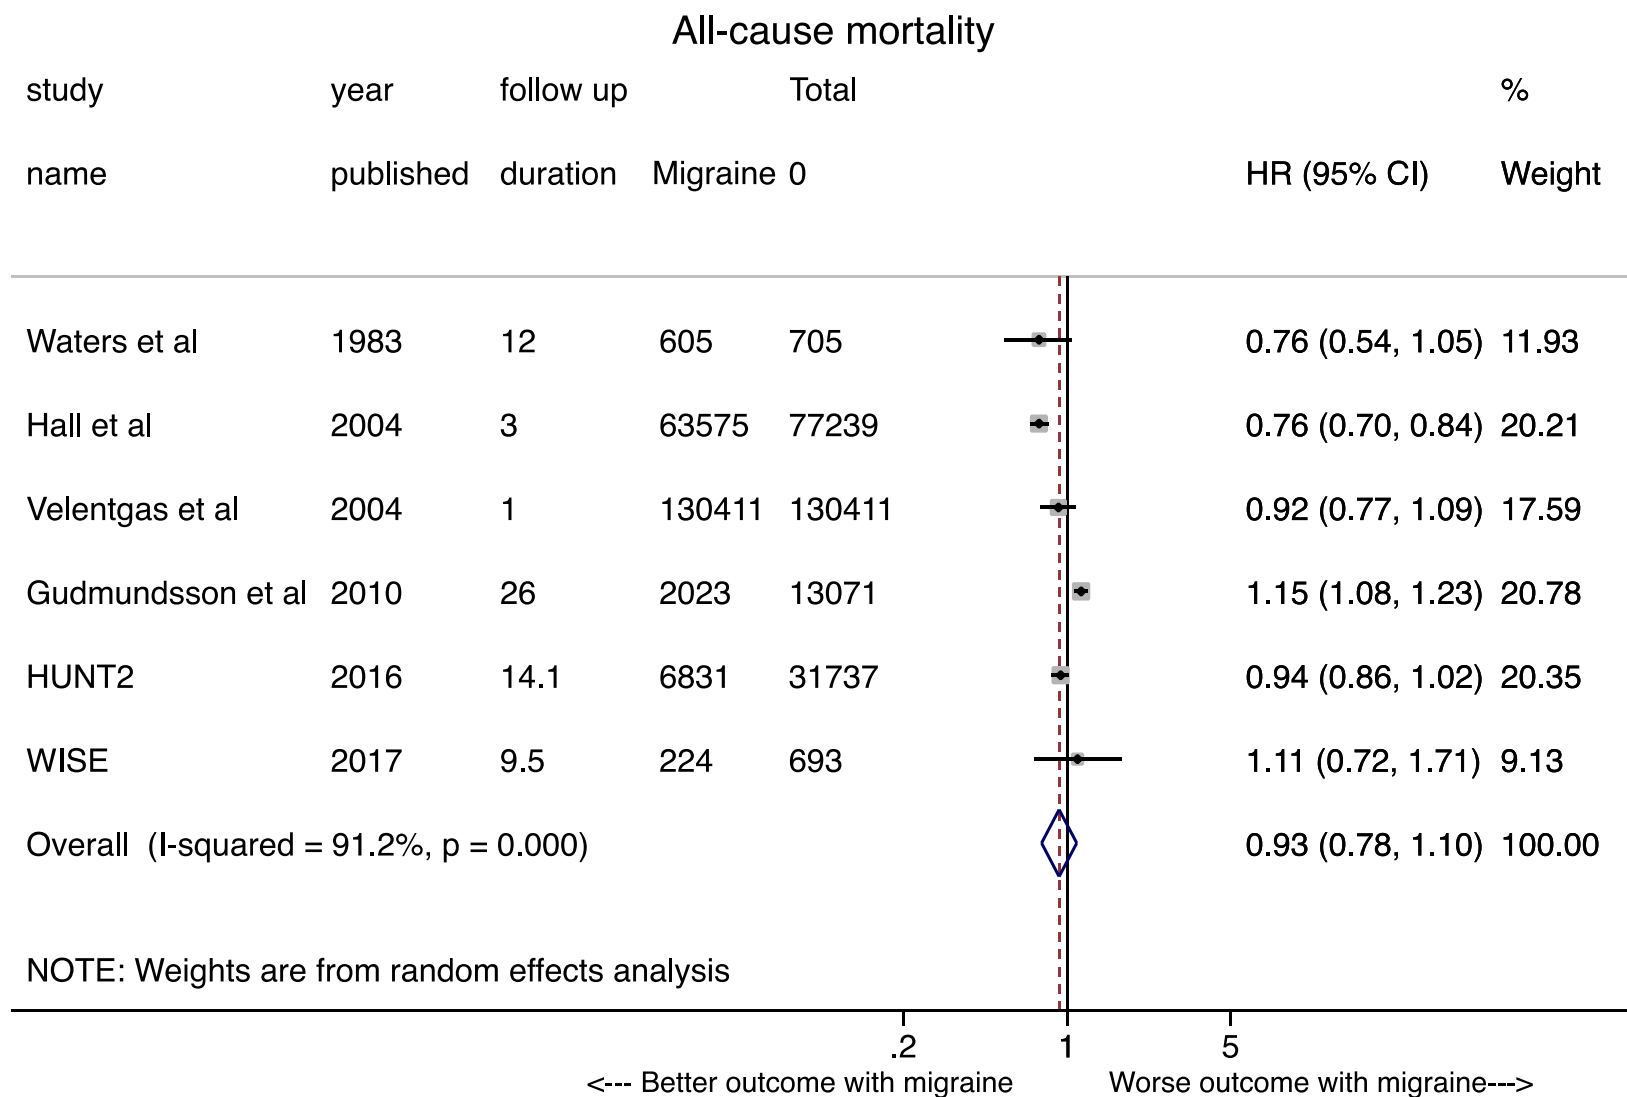

**Supplemental Figure 11:** Random effects meta-regression analysis of all-cause mortality by the duration of follow-up of each study

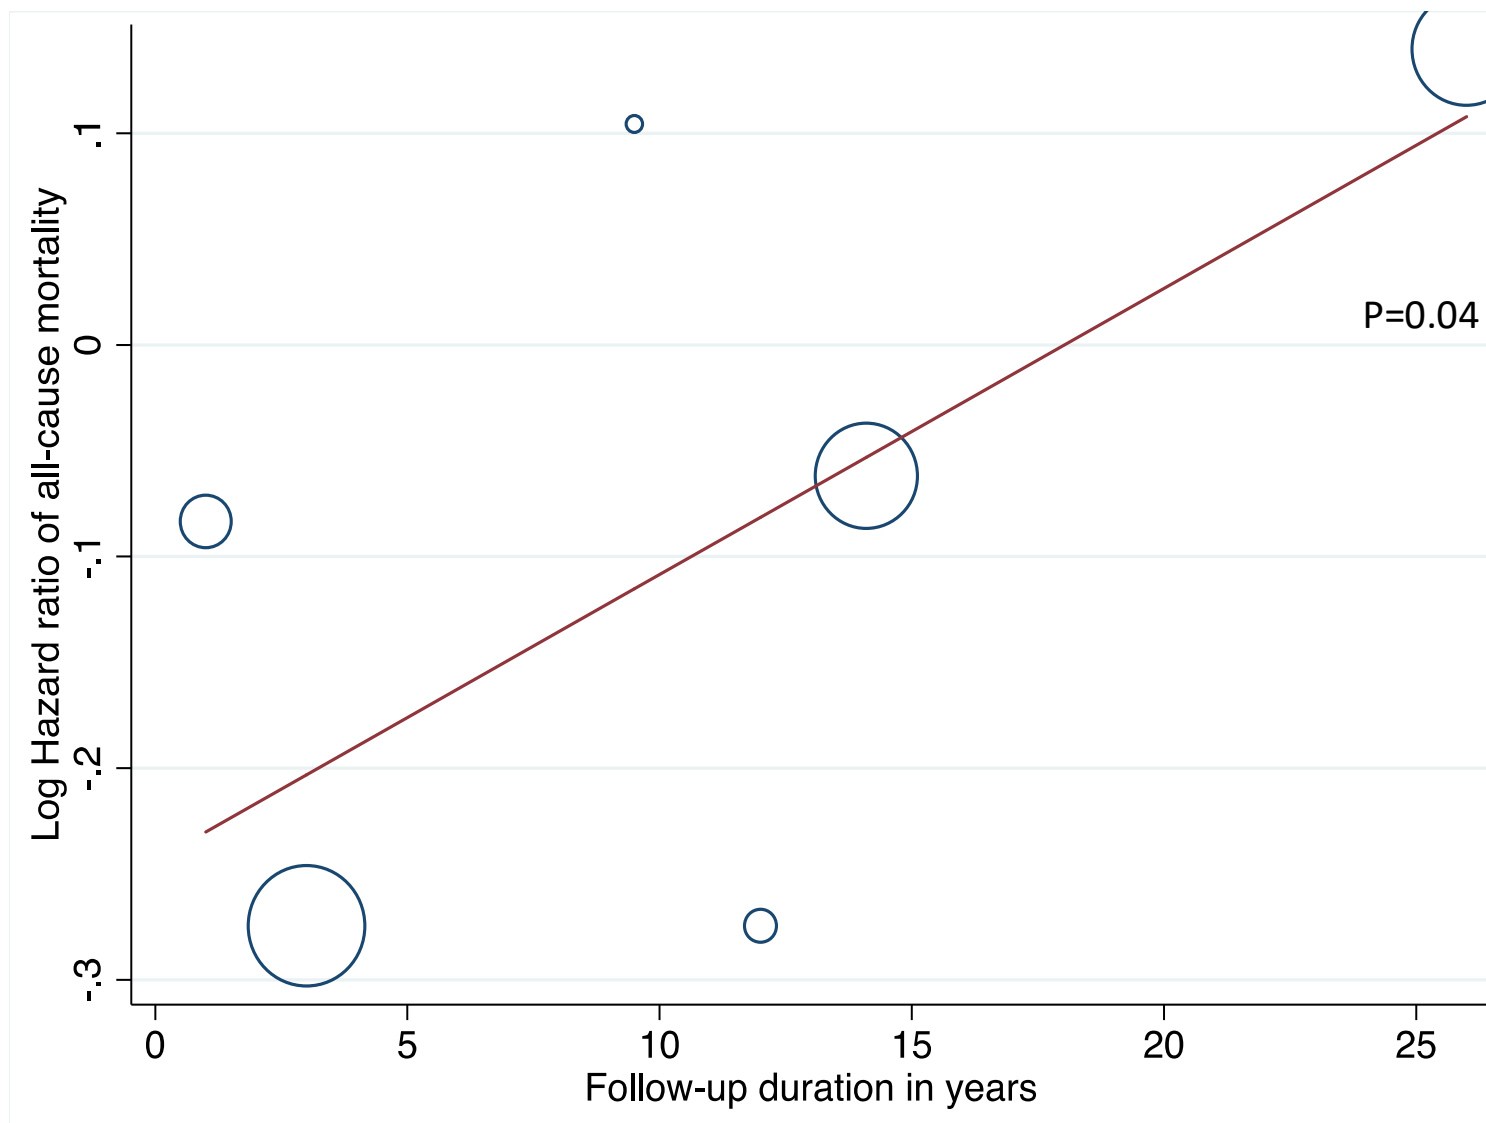

Supplement: bmjopen-2017-020498supp001.pdf [file bmjopen-2017-020498supp001.pdf]
