# Supplementary material for: Migraine and the risk of cardiovascular and cerebrovascular events: a meta-analysis of 16 cohort studies including 1 152 407 subjects
Source: PubMed Central journal article supplement — BMJ Open. 2018 Mar 27;8(3):e020498. doi: 10.1136/bmjopen-2017-020498 (PMC5875642; doi:10.1136/bmjopen-2017-020498), 2018-03-27
Supplement: bmjopen-2017-020498.draft_revisions.pdf [file bmjopen-2017-020498.draft_revisions.pdf]

# BMJ Open

BMJ Open is committed to open peer review. As part of this commitment we make the peer review history of every article we publish publicly available.

When an article is published we post the peer reviewers' comments and the authors' responses online. We also post the versions of the paper that were used during peer review. These are the versions that the peer review comments apply to.

The versions of the paper that follow are the versions that were submitted during the peer review process. They are not the versions of record or the final published versions. They should not be cited or distributed as the published version of this manuscript.

BMJ Open is an open access journal and the full, final, typeset and author-corrected version of record of the manuscript is available on our site with no access controls, subscription charges or pay-per-view fees (<http://bmjopen.bmj.com>).

If you have any questions on BMJ Open's open peer review process please email [info.bmjopen@bmj.com](mailto:info.bmjopen@bmj.com)

# BMJ Open

## Migraine and the risk of cardiovascular and cerebrovascular events: A meta-analysis of 15 cohort studies including 1,099,003 subjects

|                                 |                                                                                                                                                                                                                                                                                                                                                                                                                                                                                                                                         |
|---------------------------------|-----------------------------------------------------------------------------------------------------------------------------------------------------------------------------------------------------------------------------------------------------------------------------------------------------------------------------------------------------------------------------------------------------------------------------------------------------------------------------------------------------------------------------------------|
| Journal:                        | <i>BMJ Open</i>                                                                                                                                                                                                                                                                                                                                                                                                                                                                                                                         |
| Manuscript ID                   | bmjopen-2017-020498                                                                                                                                                                                                                                                                                                                                                                                                                                                                                                                     |
| Article Type:                   | Research                                                                                                                                                                                                                                                                                                                                                                                                                                                                                                                                |
| Date Submitted by the Author:   | 07-Nov-2017                                                                                                                                                                                                                                                                                                                                                                                                                                                                                                                             |
| Complete List of Authors:       | Mentias, Amgad; University of Iowa,<br>Elgendy, Islam; Division of Cardiovascular Medicine, University of Florida,<br>Elgendy, Akram; University of Florida<br>Qazi, Abdul; University of Iowa<br>Barakat, Amr F. ; University of Pittsburgh Department of Medicine<br>Saad, Marwan; University of Arkansas for Medical Sciences<br>Mohsen, Ala; University of Iowa<br>Abuzaid, Ahmed; Sidney Kimmel Medical College at Thomas Jefferson<br>University/Christiana Care Health System<br>mahmoud, Ahmed; University of Florida, Medicine |
| <b>Primary Subject Heading</b>: | Cardiovascular medicine                                                                                                                                                                                                                                                                                                                                                                                                                                                                                                                 |
| Secondary Subject Heading:      | Epidemiology                                                                                                                                                                                                                                                                                                                                                                                                                                                                                                                            |
| Keywords:                       | Cardiac Epidemiology < CARDIOLOGY, Myocardial infarction < CARDIOLOGY, Migraine < NEUROLOGY, Stroke < NEUROLOGY                                                                                                                                                                                                                                                                                                                                                                                                                         |
|                                 |                                                                                                                                                                                                                                                                                                                                                                                                                                                                                                                                         |

SCHOLARONE™  
Manuscripts

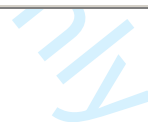

## Migraine and the risk of cardiovascular and cerebrovascular events: A meta-analysis of 15 cohort studies including 1,099,003 subjects

Amgad Mentias<sup>a\*</sup>, Islam Y. Elgendy<sup>b\*</sup>, Akram Elgendy<sup>b</sup>, Abdul Qazi<sup>a</sup>, Amr Barakat<sup>c</sup>, Marwan Saad<sup>d</sup>, Ala Mohsen<sup>a</sup>, Ahmed Abuzaid<sup>e</sup> and Ahmed N. Mahmoud<sup>b</sup>.

<sup>a</sup> Department of Medicine, Division of Cardiovascular Medicine, University of Iowa Carver College of Medicine, Iowa city, IA

<sup>b</sup> Department of Medicine, Division of Cardiovascular Medicine, University of Florida, Gainesville, FL

<sup>c</sup> Department of Cardiology, University of Pittsburgh, PA

<sup>d</sup> Department of Medicine, Division of Cardiovascular Medicine, University of Arkansas for Medical Sciences, Little Rock, AR

<sup>e</sup> Department of Cardiovascular Medicine, Jefferson University Hospital/Christiana Care Health System, Newark, DE

\*Both authors contributed equally to the current manuscript.

**Running title:** Migraine and cardiovascular outcomes

**Word count:** 3897 (excluding abstract and references)

**Disclosures and funding:** None

**Authors emails:** [amgad-mentias@uiowa.edu](mailto:amgad-mentias@uiowa.edu), [Islam.Elgendy@medicine.ufl.edu](mailto:Islam.Elgendy@medicine.ufl.edu), [Akram.Elgendy@medicine.ufl.edu](mailto:Akram.Elgendy@medicine.ufl.edu), [Abdul-qazi@uiowa.edu](mailto:Abdul-qazi@uiowa.edu), [amrfouadb@gmail.com](mailto:amrfouadb@gmail.com), [marwanssaad@gmail.com](mailto:marwanssaad@gmail.com), [ala-mohsen@uiowa.edu](mailto:ala-mohsen@uiowa.edu), [aabuzaidmd@gmail.com](mailto:aabuzaidmd@gmail.com), [Ahmed.mahmoud@medicine.ufl.edu](mailto:Ahmed.mahmoud@medicine.ufl.edu)

### Corresponding author:

Islam Y. Elgendy, MD, FACP  
Department of Medicine, Division of Cardiovascular Medicine.  
University of Florida.  
1600 SW Archer road, Gainesville, FL, USA.  
32610  
Tel: 352.273.9089  
Fax: 352.392.3606  
Email: iyelgendy@gmail.com

**Abstract:**

**Objectives:** To perform an updated meta-analysis to evaluate the long-term cardiovascular and cerebrovascular outcomes of migraineurs compared with non-migraineurs.

**Setting:** A meta-analysis of cohort studies which was performed according to the Preferred Reporting Items for Systematic Reviews and Meta-Analyses guidelines.

**Data Sources:** The PubMed, MEDLINE, Embase, and Cochrane Central Register of Controlled Trials (CENTRAL) databases were searched for relevant articles.

**Participants:** A total of 15 cohort studies with 386,307 migraineurs and 712,696 non-migraineurs were analyzed

**Primary and Secondary Outcome Measures:** Major cardiovascular and cerebrovascular adverse events (MACCE), any stroke (ischemic, haemorrhagic or non-specified), myocardial infarction (MI), and all-cause mortality.

**Data Analysis:** Summary adjusted hazard ratios (HR) were calculated by random effects Der-Simonian and Liard model. The risk of bias of the included studies was assessed by Newcastle-Ottawa scale.

**Results:** At a mean of 18.5 years, migraine was associated with higher risk of MACCE (adjusted HR 1.42, 95% CI 1.26-1.60,  $p < 0.001$ ,  $I^2 = 40\%$ ) driven by a higher risk of stroke (adjusted HR 1.50, 95% CI 1.30-1.73,  $p < 0.001$ ,  $I^2 = 71\%$ ), and MI (adjusted HR 1.23, 95% CI 1.03-1.43,  $p = 0.006$ ,  $I^2 = 59\%$ ). There was no difference in the risk of all-cause mortality (adjusted HR 0.93, 95% CI 0.78-1.10,  $p = 0.38$ ,  $I^2 = 91\%$ ), with considerable degree of heterogeneity between the included studies. The presence of aura appeared to be an effect modifier for stroke (adjusted HR Aura 1.56, 95% CI 1.32-1.83 versus adjusted HR No aura 1.13, 95% CI 0.96-1.33,  $P$  interaction = 0.009) and all-cause mortality (adjusted HR Aura 1.20, 95% CI 1.12-1.30 versus adjusted HR No aura 0.96, 95% CI 0.86-1.07,  $P$  interaction  $< 0.001$ , respectively).

**Conclusion:** Migraine headaches appear to be associated with an increased risk of cardiovascular and cerebrovascular events on the long-term.

**Registration:** PROSPERO CRD42016052460.

No funding was provided for this study from any source.

**Keywords:** Migraine; Cardiovascular outcomes; Cerebrovascular outcomes; Myocardial infarction; Stroke; Mortality

**Article Summary:***Strengths and Limitations of this study:*

- Updated meta-analysis of cohort studies to evaluate the long-term cardiovascular and cerebrovascular outcomes of migraineurs compared with non-migraineurs.
- The quality of the included trials and the risk of bias were assessed using the components described by the Newcastle-Ottawa scale.
- Multiple subgroup and meta-regression analyses were conducted.
- The limitations include the variation in the methods of ascertainment of the migraine diagnosis and the outcomes among the studies.

For peer review only

## Introduction

1  
2  
3 Migraine headache is considered the most common primary headache syndrome worldwide, with an estimated  
4 prevalence of 12% in the United States. [1] The estimated one-year prevalence of migraine is 5.6% in males  
5 and 17.1% in females. [1] The association between migraine and cardiovascular and cerebrovascular events  
6 has been a field of continuous interest. Migraine headaches, especially those complicated with aura, have  
7 been linked with cerebral hypoperfusion, systemic vasculopathy, endothelial dysfunction and hypercoagulable  
8 state. [2–4] Theoretically, these factors might increase the risk of various cardiovascular and cerebrovascular  
9 adverse events. However, studies that aimed to demonstrate an association between migraine and  
10 cardiovascular and cerebrovascular outcomes demonstrated inconsistent associations. [5–8] Prior meta-  
11 analyses assessing the association between migraines and cardiovascular and cerebrovascular outcomes  
12 have been limited with a high degree of heterogeneity for the outcomes, [9] and inclusion of case-control  
13 studies, which do not allow for assessment of longitudinal follow-up compared with cohort studies. [10] More  
14 recently, some cohorts reported the outcomes for extended follow-up. [6,11,12] We aimed to conduct a  
15 comprehensive meta-analysis evaluating the association of migraine on a wide range of outcomes to get a  
16 more clear understanding of the association between migraines and long-term cardiovascular and  
17 cerebrovascular events.

## Methods

18  
19  
20  
21  
22  
23  
24  
25  
26  
27  
28  
29  
30  
31  
32  
33  
34  
35  
36  
37  
38  
39  
40  
41 An electronic search of the MEDLINE, Web of Science and Cochrane Collaboration of Clinical Trials was  
42 performed from inception until December 2016 without language restriction, using keywords: “migraine”,  
43 “stroke”, “myocardial infarction”, “mortality” and “cardiovascular outcomes”. Bibliographies of the included  
44 studies, relevant review articles, and meta-analyses were manually searched for any potential missed studies.  
45  
46  
47  
48  
49  
50 The major cardiovascular conferences and proceedings, e.g. American College of Cardiology (ACC) and  
51 American Heart Association (AHA) conferences were screened for any abstracts addressing this topic. The  
52 current meta-analysis was registered with the International Prospective Register for Systemic Reviews or  
53 PROSPERO (CRD42016052460) and conducted according to the Meta-analysis Of Observational Studies in  
54  
55  
56  
57  
58  
59  
60

1 Epidemiology (MOOSE) group and the Preferred Reporting Items for Systematic Reviews and Meta-Analyses  
2 (PRISMA) guidelines. [13,14]  
3  
4

5 Observational cohort studies evaluating cardiovascular and cerebrovascular outcomes in adult subjects with  
6 migraine were included. We required that the studies had reported outcomes in both a migraine arm and no  
7 migraine arms to be included. Outcomes in non-migraine headaches were not included in our analysis. If a  
8 studied population reported more than one publication, the outcomes were preferentially reported at the  
9 longest follow-up duration. Since we aimed to determine the association of migraine on longitudinal follow-up,  
10 studies with a case-control or cross sectional design were excluded. [15] Data were extracted by 2  
11 independent groups, and revised by the first author (A.M.) for accuracy. Any discrepancy was resolved by  
12 consensus among the authors.  
13  
14  
15  
16  
17  
18  
19  
20  
21  
22

23 The outcomes assessed in this study included: major cardiovascular and cerebrovascular adverse events  
24 (MACCE), any stroke (ischemic, haemorrhagic or non-specified), myocardial infarction (MI), and all-cause  
25 mortality. We evaluated all-cause mortality, rather than cardiovascular mortality, as all-cause mortality is  
26 considered a preferable outcome in the evaluation of cardiovascular disease. [16]  
27  
28  
29  
30  
31

32 The quality of evidence was assessed at both the individual study level and outcome level. The Newcastle-  
33 Ottawa scale was used for assessment of the risk of bias of each study included. A study was considered high  
34 quality if it achieved 7 out of 9 points. (**Supplemental Material**) The Grades of Recommendation, Assessment,  
35 Development and Evaluation (GRADE) tool was used for assessment of the overall quality of evidence for  
36 each outcome. [17] This tool specifies 4 levels of quality (high, moderate, low and very low) depending on the  
37 design of the included studies, indirectness of evidence, unexplained heterogeneity or inconsistency of results,  
38 imprecision of the results and high probability of the publication bias.  
39  
40  
41  
42  
43  
44  
45  
46  
47

48 All descriptive analyses were conducted using weighted means and ranges for continuous variables and  
49 weighted frequencies for categorical variables, with the weight corresponding to the sample size of each study.  
50 Since the included studies were cohort in design, RRs or HRs with 95% confidence intervals (CI) were chosen  
51 to represent the effect size. For each outcome, an unadjusted summary RR was calculated using the reported  
52 events in both migraineurs and non-migraineurs arms. [18] The main summary effect size for each outcome  
53  
54  
55  
56  
57  
58  
59  
60

1 was calculated using the adjusted HR or RR reported by each study. This was done to ensure a more accurate  
2 estimation of effect sizes after adjustment for potential confounders. If a study reported the effect size as OR, it  
3 was converted to RR using a previously described formula. [19] Both unadjusted and adjusted outcomes were  
4 calculated by random effects model using the Der-Simonian and Laird model. [18] A random effects model was  
5 selected as we anticipated some degree of heterogeneity for the outcomes as demonstrated in previous meta-  
6 analyses. Publication bias was assessed by both Egger's test and visual funnel plots. [20] The degree of  
7 heterogeneity was evaluated by  $I^2$  statistic. [17]

8  
9  
10  
11  
12  
13  
14  
15  
16 As studies had suggested that aura is a potential effect modifier,[21,22] a subgroup analysis was conducted to  
17 assess the impact of aura on each outcome, whenever feasible. Another pre-specified subgroup analysis was  
18 performed according to gender (females versus males), whenever applicable. Random effects meta-regression  
19 analysis was conducted to evaluate the impact of the duration of follow-up duration on the outcomes. A pre-  
20 specified sensitivity analysis was performed for high quality studies only as assessed by the Newcastle-Ottawa  
21 scale. All analyses were considered statistically significant if the P-value was <0.05 and all effect sizes were  
22 calculated with 95% CI. The statistical analysis was conducted using STATA 9 software version 14 (StataCorp,  
23 College Station, Texas).

## 34 35 **Results**

36  
37 The initial search yielded 2,770 articles (**Figure 1**) of which 2698, articles were excluded upon revision of the  
38 titles and abstracts. Among the remaining 72 studies, 38 were excluded due to case control or cross sectional  
39 design, 8 studies evaluated subclinical brain changes, 5 studies reported earlier results in overlapping cohorts,  
40 [23–27] 4 studies restricted the inclusion to a certain age group either pediatric [28] or elderly subjects (>65, 50  
41 and 40 years respectively). [29–31] Seventeen articles reporting 15 studies were included in the final analysis  
42 with a total number of 1,099,003 subjects: 386,307 migraineurs and 712,696 non- migraineurs. [5–  
43 8,11,12,21,22,32–40] In the Women's Health Study, all outcomes were reported in one publication except  
44 haemorrhagic stroke was reported separately in another publication. [21,22] Similarly, in the Physician's Health  
45 Study, haemorrhagic stroke was reported in separate publication. [7,39]



Study characteristics are shown in **Table 1**. The included studies were from 6 countries and with a follow-up duration ranging from 1 to 26 years. Overall, 11 studies were deemed high quality by Newcastle-Ottawa scale, [5,7,12,21,22,32–37] while the remaining 4 were considered of low quality (**Supplemental Table 1**). [6,8,38,40] All of the included studies adjusted the HR by age and most of them also adjusted for hypertension, diabetes and hyperlipidemia (**Supplemental Table 2**). The method of migraine assessment was either through questionnaires or hospital records (physician diagnosis) (**Supplemental Table 3**). The baseline characteristics of included subjects are shown in **Supplemental Table 4**. The mean age of the included subjects was 40 (range 32-59) years old. Four studies were exclusively females, [6,8,12,21] one study included males only, [7] while the remaining studies enrolled both sexes. Information on aura status was available in 6 studies. [5,21,27,33,35,36]

#### *Major adverse cardiac and cerebrovascular events (MACCE)*

MACCE was reported by four studies. [6,7,12,21] Three studies were considered high quality by Newcastle-Ottawa scale (**Supplemental Table 1**). The definition of MACCE by each study is reported in **Supplemental Table 5**. There was no evidence of publication bias by both Egger's test ( $p=0.87$ ) and funnel plot visualization (**Supplemental Figure 1**). The level of evidence appeared to be high by GRADE assessment tool (**Supplemental Table 6**).

At a mean follow-up duration of 18.5 years (range 10 to 20 years), the risk of MACCE appeared to be higher in migraineurs (unadjusted RR 1.09, 95% CI 0.98-1.22,  $P=0.12$ ,  $I^2=0\%$ ; adjusted HR 1.42, 95% CI 1.26-1.60,  $p<0.001$ ,  $I^2=40\%$ ) with low to moderate degree of heterogeneity between studies (**Supplemental Figure 2**).

The sensitivity analysis limited to high quality studies showed similar results (adjusted HR 1.39, 95% CI 1.24-1.57,  $P<0.001$ ,  $I^2=43\%$ ). Subgroup analysis by the presence of aura could not be performed due to the small number of studies. Subgroup analysis according to gender showed no difference based on gender (**Supplemental Figure 3**). Meta-regression showed that the length of follow-up duration was not a significant source of heterogeneity ( $P=0.79$ ) (**Supplemental Figure 4A**).

Twelve studies reported the outcome of stroke. [6,7,11,12,21,22,32–39] One study reported haemorrhagic stroke only [35], 2 reported ischemic stroke only [11,36], 3 studies reported both ischemic and haemorrhagic stroke [7,21,22,34,39], and 6 studies reported stroke without specification. [6,12,32,33,37,38] Ten studies were

1 considered as high quality by Newcastle-Ottawa scale (**Supplemental Table 1**). There was no evidence of  
2 publication bias by both Egger's test ( $p=0.66$ ) and funnel plot visualization (**Supplemental Figure 5**). The level  
3 of evidence was high by GRADE assessment tool (**Supplemental Table 6**).

4  
5  
6 At a mean follow-up duration of 5.8 years (range 1 to 26 years), migraineurs had a higher risk of stroke  
7  
8 (unadjusted RR 1.44, 95% CI 1.11-1.85,  $P=0.005$ ,  $I^2=92\%$ ; adjusted HR 1.45, 95% CI 1.26-1.66,  $p<0.001$ ,  
9  
10  $I^2=71\%$ ) (**Figure 2**). This was true for both ischemic stroke (adjusted HR 1.29, 95% CI 1.06-1.58,  $p=0.011$ ,  
11  
12  $I^2=65\%$ ), as well as haemorrhagic stroke (adjusted HR 1.50, 95% CI 1.01-2.24,  $p=0.046$ ,  $I^2=64\%$ ) (**Figure 2**).  
13  
14 The sensitivity analysis limited to high quality studies showed similar results (adjusted HR 1.39, 95% CI 1.21-  
15  
16 1.60,  $P<0.001$ ,  $I^2=71\%$ ). There was evidence of considerable heterogeneity between the included studies,  
17  
18 which was less evident after performing a subgrouping analysis according to the aura status. The risk of stroke  
19  
20 was evident only in the migraineurs with aura (adjusted HR 1.56, 95% CI 1.32-1.83,  $p<0.001$ ,  $I^2=0\%$ ), but not in  
21  
22 those without aura (adjusted HR 1.13, 95% CI 0.96-1.33,  $p=0.143$ ,  $I^2=0\%$ ),  $P_{\text{interaction}}=0.006$ , with no evidence  
23  
24 of heterogeneity between the studies (**Figure 3**). Subgroup analysis according to gender showed no difference  
25  
26 based on gender (**Supplemental Figure 3**). Meta-regression analysis did not identify the length of follow up as  
27  
28 potential a source of heterogeneity ( $P=0.28$ ) (**Supplemental Figure 4B**).

29  
30  
31  
32 Seven studies reported MI events. [6,7,12,21,34,37,40] Five studies were high quality by Newcastle-Ottawa  
33  
34 scale (**Supplemental Table 1**). MI definitions for each study are shown in **Supplemental Table 7**. There was  
35  
36 no evidence of publication bias by both Egger's test and funnel plot (**Supplemental Figure 6**). The quality of  
37  
38 evidence was high by GRADE assessment tool (**Supplemental Table 6**).

39  
40  
41 At a mean follow-up of 8.8 years (range 1 to 20 years), migraine was associated with a higher risk of MI  
42  
43 (unadjusted RR 1.37, 95% CI 1.10-1.71,  $P=0.001$ ,  $I^2=54\%$ ; adjusted HR 1.23, 95% CI 1.03-1.43,  $p=0.006$ ,  
44  
45  $I^2=59\%$ ) with a substantial evidence of heterogeneity between studies (**Supplemental Figure 7**). The  
46  
47 sensitivity analysis limited to high quality studies showed improved heterogeneity (adjusted HR 1.32, 95% CI  
48  
49 1.19-1.47,  $P<0.001$ ,  $I^2=7\%$ ). Subgroup analyses by aura could not be performed due to the limited number of  
50  
51 studies reporting MI outcome by aura (only one study). Subgroup analysis according to gender did not illustrate  
52  
53 any differences according to gender (**Supplemental Figure 3**). The heterogeneity of MI risk was improved by  
54  
55 meta-regression by follow-up duration, with evidence of higher risk of MI as the duration of follow-up was  
56  
57 increased ( $P=0.02$ ) and no residual heterogeneity after model adjustment ( $I^2=0\%$ ) (**Supplemental Figure 4C**).

1 Six studies reported all-cause mortality. [5,6,8,33,34,37] Four studies were considered high quality by  
2 Newcastle-Ottawa scale (**Supplemental Table 1**). There was no evidence of publication bias by both Egger's  
3 test ( $P=0.81$ ) and funnel plot (**Supplemental Figure 8**). The quality of evidence was high by GRADE  
4 assessment tool (**Supplemental Table 6**).

5  
6  
7  
8 At a mean of 4.9 years (range 1 to 26 years), the overall risk of all-cause mortality was similar between  
9 subjects with or without migraine (unadjusted RR 0.74, 95% CI 0.49-1.10,  $P=0.137$ ,  $I^2=99\%$ ; and adjusted HR  
10 0.93, 95% CI 0.78-1.10,  $p=0.38$ ,  $I^2=91\%$ ) with considerable degree of heterogeneity between studies  
11 (**Supplemental Figure 9**). The sensitivity analysis limited to high quality studies showed similar results  
12 (adjusted HR 0.94 95% CI 0.74-1.19,  $P=0.60$   $I^2=93\%$ ). The heterogeneity decreased significantly on subgroup  
13 analysis by the presence of aura (adjusted HR 1.20, 95% CI 1.12-1.30,  $p<0.001$ ,  $I^2=0\%$ ) or absence of aura  
14 (adjusted HR 0.96, 95% CI 0.86-1.07,  $P=0.436$ ,  $I^2=53$ ),  $P_{\text{interaction}}<0.001$  (**Figure 3**). Subgroup analysis  
15 according to gender did not show any difference (**Supplemental Figure 3**). Meta-regression demonstrated that  
16 the follow-up duration was a significant source of heterogeneity, and there was evidence of higher risk of all-  
17 cause mortality as the duration of follow-up increased ( $p=0.038$ ), with low to moderate residual heterogeneity  
18 after adjustment ( $I^2=45\%$ ) (**Supplemental Figure 4D**).

## 34 Discussion

35  
36  
37 In this meta-analysis of 15 observational cohort studies with over 1,000,000 subjects and an extended follow-  
38 up duration up to 26 years, we demonstrated that migraine might be associated with a higher risk of MACCE,  
39 mainly driven by a higher risk of stroke and MI. Although the risk of all-cause mortality was not significantly  
40 higher in migraineurs, this outcome was characterized by a high degree of heterogeneity. Compared to those  
41 without aura, migraineurs with aura appeared to have worse cardiovascular and cerebrovascular outcomes  
42 including stroke, and all-cause mortality. There was no noted difference related to gender. The risk of all-cause  
43 mortality and MI appeared to be time dependent with a higher risk of both outcomes on the long-term follow-  
44 up. We noted that the degree of heterogeneity was less evident for all outcomes, when the migraineurs were  
45 stratified by the presence of aura. There was also evidence of effect modification for stroke and all-cause  
46  
47  
48  
49  
50  
51  
52  
53  
54  
55  
56  
57  
58  
59  
60

1 mortality by the presence of aura. Hence, the presence of aura identified a subgroup of migraineurs, who were  
2 at risk for future cardiovascular and cerebrovascular events.  
3  
4

5 Interestingly, the variation of duration of follow-up among the included studies had a noticeable impact on the  
6 outcomes of MI and all-cause mortality, with evidence of higher risk as the duration of follow-up increases. The  
7 meta-regression by follow-up duration explained all of MI and 80% of all-cause mortality effect size variability  
8 between the included studies, with low to moderate residual heterogeneity after model adjustment. This  
9 suggests a possible time dependent nature for these outcomes, with higher risk of developing an outcome as  
10 the duration of follow-up increases. These findings are also in agreement with prior studies that followed  
11 migraineurs for a longer duration and found a significant association of migraine (especially those with aura)  
12 with higher risk of all-cause mortality [33].  
13  
14  
15  
16  
17  
18  
19  
20  
21  
22

23 Although the underlying etiology for the association between migraine and cardiovascular and cerebrovascular  
24 events such as stroke and MI remains unclear, several factors might help explain such association.  
25

26 Migraineurs were found to have higher levels of platelet aggregation, von Willebrand factor, and higher  
27 prevalence of hypercoagulable states. [4,41,42] Neurophysiological studies have linked migraine aura to  
28 cortical spreading depression, which is known to predispose the brain to cerebral hypoperfusion and arterial  
29 ischemia. [43] Thus, migraine as a disorder seems to be a systemic vascular disorder, as evident by arterial  
30 stiffness and endothelial dysfunction in peripheral vasculature in migraineurs. [44] Some other studies had  
31 linked between migraine with aura and patent foramen ovale (PFO) and atrial septal aneurysm. These studies  
32 had suggested that PFO might play a role in development of aura symptoms and cryptogenic stroke in this  
33 population [45]. Although some authors had suggested that the higher risk of cardiovascular and  
34 cerebrovascular events in these subjects might be attributed to the higher prevalence of other cardiovascular  
35 risk factors such as smoking, hyperlipidemia and hypertension among migraineurs. Our adjusted analyses  
36 corrected for most of the conventional cardiovascular risk factors and demonstrated an association between  
37 migraine and stroke and MI.  
38  
39  
40  
41  
42  
43  
44  
45  
46  
47  
48  
49  
50  
51  
52

53 An important question remains: should we consider migraine as a modifiable risk factor for future  
54 cardiovascular and cerebrovascular events? Future research should focus on developing risk models and  
55 better prediction tools for risk stratifications of these subjects taking into account different migraine features  
56  
57  
58  
59  
60

1 such as aura status and frequency of attacks. Prior studies suggested that the frequency of migraine attacks  
2 could be an actual risk factor for stroke occurrence, but not for other cardiovascular outcomes. [46] The  
3 efficacy of adequate migraine control with triptans and the use of antiplatelet agents or statins for primary  
4 prevention are all areas of research which might shed some light regarding the best preventive therapy for  
5 migraineurs. [47] Percutaneous closure of PFO in migraineurs is another potential treatment modality that is  
6 currently being evaluated to determine whether this procedure would improve migraine symptoms. [45]

7  
8 To our knowledge, the current meta-analysis represents the largest and most updated meta-analysis of cohort  
9 studies evaluating the association between migraine and cardiovascular and cerebrovascular outcomes. The  
10 strengths of this study include: the large sample size, the use of adjusted summary estimates which attempted  
11 to minimize the risk of confounding, and the wide variety of analyses which were conducted to assess for the  
12 reasons of heterogeneity among the included studies. However, this study is not without limitations. Despite  
13 multiple subgroup and sensitivity analyses, there was still a considerable degree of heterogeneity for most  
14 outcomes. This could be attributed to several factors: migraine is heterogeneous disease itself with many  
15 subtypes and variability in symptoms and classifying migraine into aura and no aura is a crude classification.<sup>48</sup>  
16 Second, methods of ascertainment of the migraine diagnosis varied among the studies between questionnaire,  
17 self-reporting, physician diagnosis, and retrospective collection on national health data. Third, methods of  
18 ascertainment of the outcomes varied significantly between phone calls, interviews, or physician office visits.  
19 Fourth, the included studies were composed of different races with some studies including only Asians and  
20 others done in Europe or the United States. Fifth, the included studies were non-randomized, however; most of  
21 the studies were considered as high quality and had reported adjusted outcomes. Lastly, data regarding the  
22 frequency of attacks was not collected in most of the studies, so an analysis based on the frequency of  
23 migraine attacks could not be performed.

## 51 **Conclusions:**

52  
53  
54 Migraine headaches appear to be associated with an increased risk of cardiovascular and cerebrovascular  
55 events on the long-term. This association was driven mainly by a higher risk of stroke and MI. Migraineurs with  
56

1 aura appeared to have an increased risk of events compared with those without aura. Future studies should be  
2 directed towards reducing the risk of cardiovascular and cerebrovascular events among migraineurs  
3 particularly those with aura.  
4  
5

### 6 **Funding Sources**

7  
8  
9  
10 This research received no specific grant from any funding agency in the public, commercial or not-for-profit  
11 sectors.  
12  
13

### 14 **Conflict of Interest**

15  
16 All authors have nothing to disclose.  
17  
18  
19

### 20 **Contributorship Statement**

21  
22  
23  
24 AM: data collection, data interpretation, drafting manuscript, final critical revision of the manuscript and final  
25 approval. IE: data analysis, data interpretation, drafting manuscript, final critical revision of the manuscript and  
26 final approval. AE: contributed to data extraction. AQ: contributed to data extraction. AB: contributed to data  
27 extraction and final critical revision of the manuscript. MS: final critical revision of the manuscript. Ala Mohsen:  
28 contributed to data extraction. AA: contributed to data extraction and final critical revision of the manuscript.  
29  
30 ANM: data analysis, data interpretation, drafting manuscript, final critical revision of the manuscript and final  
31 approval.  
32  
33  
34  
35  
36  
37  
38  
39

### 40 **Data Sharing Statement**

41  
42 No additional data are available.  
43  
44  
45  
46  
47

48 **Acknowledgements:** None  
49  
50  
51  
52  
53  
54  
55  
56  
57  
58  
59  
60

**References:**

1. Lipton RB, Bigal ME, Diamond M, Freitag F, Reed ML, Stewart WF. Migraine prevalence, disease burden, and the need for preventive therapy. *Neurology* [Internet]. 2007 [cited 2016 Dec 4];68:343–9. Available from: <http://www.ncbi.nlm.nih.gov/pubmed/17261680>
2. Woods RP, Iacoboni M, Mazziotta JC. Brief report: bilateral spreading cerebral hypoperfusion during spontaneous migraine headache. *N. Engl. J. Med.* [Internet]. 1994 [cited 2016 Dec 13];331:1689–92. Available from: <http://www.ncbi.nlm.nih.gov/pubmed/7969360>
3. Tietjen GE. Migraine as a systemic vasculopathy. *Cephalalgia* [Internet]. 2009 [cited 2016 Dec 13];29:987–96. Available from: <http://www.ncbi.nlm.nih.gov/pubmed/19689607>
4. Martínez-Sánchez P, Martínez-Martínez M, Fuentes B, Cuesta M V, Cuéllar-Gamboa L, Idrovo-Freire L, et al. Migraine and hypercoagulable states in ischemic stroke. *Cephalalgia* [Internet]. 2011 [cited 2016 Dec 13];31:1609–17. Available from: <http://www.ncbi.nlm.nih.gov/pubmed/22110165>
5. Åsberg AN, Stovner LJ, Zwart J-A, Winsvold BS, Heuch I, Hagen K. Migraine as a predictor of mortality: The HUNT study. *Cephalalgia* [Internet]. 2016 [cited 2016 Dec 13];36:351–7. Available from: <http://www.ncbi.nlm.nih.gov/pubmed/26115666>
6. Rambarat CA, Elgendy IY, Johnson BD, Reis SE, Thompson D V., Sharaf BL, et al. Migraine Headache and Long Term Cardiovascular Outcomes: An extended follow-up of the Women's Ischemia Syndrome Evaluation. *Am. J. Med.* [Internet]. 2017 [cited 2017 Mar 8]; Available from: <http://www.ncbi.nlm.nih.gov/pubmed/28109970>
7. Kurth T, Gaziano JM, Cook NR, Bubes V, Logroscino G, Diener H-C, et al. Migraine and risk of cardiovascular disease in men. *Arch. Intern. Med.* [Internet]. 2007 [cited 2016 Dec 13];167:795–801. Available from: <http://www.ncbi.nlm.nih.gov/pubmed/17452542>
8. Waters WE, Campbell MJ, Elwood PC. Migraine, headache, and survival in women. *Br. Med. J. (Clin. Res. Ed).* [Internet]. 1983 [cited 2016 Dec 13];287:1442–3. Available from:



1 <http://www.pubmedcentral.nih.gov/articlerender.fcgi?artid=1549656&tool=pmcentrez&rendertype=abstract>

2  
3 9. Schürks M, Rist PM, Shapiro RE, Kurth T. Migraine and mortality: a systematic review and meta-analysis.  
4 Cephalalgia [Internet]. 2011 [cited 2016 Nov 8];31:1301–14. Available from:

5  
6 <http://www.pubmedcentral.nih.gov/articlerender.fcgi?artid=3175288&tool=pmcentrez&rendertype=abstract>

7  
8  
9  
10 10. Schürks M, Rist PM, Bigal ME, Buring JE, Lipton RB, Kurth T. Migraine and cardiovascular disease:  
11 systematic review and meta-analysis. BMJ [Internet]. 2009;339:b3914. Available from:

12  
13 <http://www.pubmedcentral.nih.gov/articlerender.fcgi?artid=2768778&tool=pmcentrez&rendertype=abstract>

14  
15  
16  
17 11. Androulakis XM, Kodumuri N, Giamberardino LD, Rosamond WD, Gottesman RF, Yim E, et al. Ischemic  
18 stroke subtypes and migraine with visual aura in the ARIC study. Neurology [Internet]. 2016 [cited 2016 Dec  
19 18];87:2527–32. Available from: <http://www.neurology.org/lookup/doi/10.1212/WNL.0000000000003428>

20  
21  
22  
23 12. Kurth T, Winter AC, Eliassen AH, Dushkes R, Mukamal KJ, Rimm EB, et al. Migraine and risk of  
24 cardiovascular disease in women: prospective cohort study. BMJ [Internet]. 2016 [cited 2016 Aug  
25 19];353:i2610. Available from:

26  
27  
28  
29 <http://www.pubmedcentral.nih.gov/articlerender.fcgi?artid=4887613&tool=pmcentrez&rendertype=abstract>

30  
31  
32  
33 13. Stroup DF, Berlin JA, Morton SC, Olkin I, Williamson GD, Rennie D, et al. Meta-analysis of observational  
34 studies in epidemiology: a proposal for reporting. Meta-analysis Of Observational Studies in Epidemiology  
35 (MOOSE) group. JAMA [Internet]. 2000 [cited 2016 Sep 19];283:2008–12. Available from:

36  
37  
38  
39 <http://www.ncbi.nlm.nih.gov/pubmed/10789670>

40  
41  
42  
43 14. Moher D, Liberati A, Tetzlaff J, Altman DG. Preferred reporting items for systematic reviews and meta-  
44 analyses: the PRISMA statement. BMJ [Internet]. 2009 [cited 2015 Oct 28];339:b2535. Available from:

45  
46 <http://www.pubmedcentral.nih.gov/articlerender.fcgi?artid=2714657&tool=pmcentrez&rendertype=abstract>

47  
48  
49  
50 15. Kopec JA, Esdaile JM. Bias in case-control studies. A review. J. Epidemiol. Community Health [Internet].  
51 1990 [cited 2016 Dec 16];44:179–86. Available from:

52  
53  
54 <http://www.pubmedcentral.nih.gov/articlerender.fcgi?artid=1060638&tool=pmcentrez&rendertype=abstract>

55  
56  
57 16. Lauer MS, Blackstone EH, Young JB, Topol EJ. Cause of death in clinical research: Time for a



reassessment? *J. Am. Coll. Cardiol.* 1999;34:618–20.

17. Higgins JP, Green S. *Cochrane Handbook for Systematic Reviews of [Internet]*. Cochrane Collab. 2008.

Available from: <http://onlinelibrary.wiley.com/doi/10.1002/9780470712184.fmatter/summary>

18. DerSimonian R, Laird N. Meta-analysis in clinical trials. *Control. Clin. Trials [Internet]*. 1986 [cited 2015 Jan

2];7:177–88. Available from: <http://www.ncbi.nlm.nih.gov/pubmed/3802833>

19. Grant RL. Converting an odds ratio to a range of plausible relative risks for better communication of

research findings. *BMJ [Internet]*. 2014 [cited 2016 Dec 14];348:f7450. Available from:

<http://www.ncbi.nlm.nih.gov/pubmed/24464277>

20. Egger M, Davey Smith G, Schneider M, Minder C. Bias in meta-analysis detected by a simple, graphical

test. *BMJ [Internet]*. 1997 [cited 2015 Oct 27];315:629–34. Available from:

<http://www.pubmedcentral.nih.gov/articlerender.fcgi?artid=2127453&tool=pmcentrez&rendertype=abstract>

21. Kurth T, Gaziano JM, Cook NR, Logroscino G, Diener H-C, Buring JE. Migraine and risk of cardiovascular

disease in women. *JAMA.* 2006;296:283–91.

22. Kurth T, Kase CS, Schürks M, Tzourio C, Buring JE. Migraine and risk of haemorrhagic stroke in women:

prospective cohort study. *BMJ [Internet]*. 2010 [cited 2016 Dec 13];341:c3659. Available from:

<http://www.pubmedcentral.nih.gov/articlerender.fcgi?artid=2927695&tool=pmcentrez&rendertype=abstract>

23. Ahmed B, Bairey Merz CN, McClure C, Johnson BD, Reis SE, Bittner V, et al. Migraines, angiographic

coronary artery disease and cardiovascular outcomes in women. *Am. J. Med. [Internet]*. 2006 [cited 2016 Dec

13];119:670–5. Available from: <http://www.ncbi.nlm.nih.gov/pubmed/16887413>

24. Cook NR, Benseñor IM, Lotufo PA, Lee I-M, Skerrett PJ, Chown MJ, et al. Migraine and coronary heart

disease in women and men. *Headache [Internet]*. 2002 [cited 2016 Dec 13];42:715–27. Available from:

<http://www.ncbi.nlm.nih.gov/pubmed/12390634>

25. Kurth T, Slomke MA, Kase CS, Cook NR, Lee I-M, Gaziano JM, et al. Migraine, headache, and the risk of

stroke in women: a prospective study. *Neurology [Internet]*. 2005 [cited 2016 Aug 19];64:1020–6. Available

1 from: <http://www.ncbi.nlm.nih.gov/pubmed/15781820>

2  
3 26. Becker C, Brobert GP, Almqvist PM, Johansson S, Jick SS, Meier CR. Migraine and the risk of stroke, TIA,  
4 or death in the UK. *Headache*. 2007;47:1374–84.

5  
6  
7  
8 27. Stang PE, Carson AP, Rose KM, Mo J, Ephross SA, Shahar E, et al. Headache, cerebrovascular  
9 symptoms, and stroke: The atherosclerosis risk in communities study. *Neurology*. 2005;64:1573–7.

10  
11  
12  
13 28. Gelfand AA, Fullerton HJ, Jacobson A, Sidney S, Goadsby PJ, Kurth T, et al. Is migraine a risk factor for  
14 pediatric stroke? *Cephalalgia* [Internet]. 2015 [cited 2016 Dec 13];35:1252–60. Available from:

15  
16 <http://www.pubmedcentral.nih.gov/articlerender.fcgi?artid=4564362&tool=pmcentrez&rendertype=abstract>

17  
18  
19  
20 29. Norton J, Portet F, Gabelle A, Debette S, Ritchie K, Touchon J, et al. Are migraine and non-migrainous  
21 headache risk factors for stroke in the elderly? Findings from a 12-year cohort follow-up. *Eur. J. Neurol*.

22  
23 [Internet]. 2016 [cited 2016 Dec 13];23:1463–70. Available from:

24  
25 <http://www.ncbi.nlm.nih.gov/pubmed/27399611>

26  
27  
28  
29 30. Monteith TS, Gardener H, Rundek T, Elkind MS V, Sacco RL. Migraine and risk of stroke in older adults:  
30 Northern Manhattan Study. *Neurology* [Internet]. 2015 [cited 2016 Dec 13];85:715–21. Available from:

31  
32 <http://www.pubmedcentral.nih.gov/articlerender.fcgi?artid=4553031&tool=pmcentrez&rendertype=abstract>

33  
34  
35  
36 31. Liew G, Wang JJ, Mitchell P. Migraine and coronary heart disease mortality: a prospective cohort study.  
37 *Cephalalgia*. 2007;27:368–71.

38  
39  
40  
41 32. Wang Y-C, Lin C-W, Ho Y-T, Huang Y-P, Pan S-L. Increased risk of ischemic heart disease in young  
42 patients with migraine: a population-based, propensity score-matched, longitudinal follow-up study. *Int. J.*

43  
44 *Cardiol*. [Internet]. 2014 [cited 2016 Dec 13];172:213–6. Available from:

45  
46 <http://www.ncbi.nlm.nih.gov/pubmed/24462142>

47  
48  
49  
50  
51 33. Gudmundsson LS, Scher AI, Aspelund T, Eliasson JH, Johannsson M, Thorgeirsson G, et al. Migraine with  
52 aura and risk of cardiovascular and all cause mortality in men and women: prospective cohort study. *BMJ*

53  
54 [Internet]. 2010;341:c3966. Available from: <http://www.ncbi.nlm.nih.gov/pubmed/20736269>

34. Hall GC, Brown MM, Mo J, MacRae KD. Triptans in migraine: the risks of stroke, cardiovascular disease, and death in practice. *Neurology* [Internet]. 2004 [cited 2016 Dec 13];62:563–8. Available from: <http://www.ncbi.nlm.nih.gov/pubmed/14981171>
35. Kuo C-Y, Yen M-F, Chen L-S, Fann C-Y, Chiu Y-H, Chen H-H, et al. Increased risk of hemorrhagic stroke in patients with migraine: a population-based cohort study. *PLoS One*. 2013;8:e55253.
36. Peng K-P, Chen Y-T, Fuh J-L, Tang C-H, Wang S-J. Migraine and incidence of ischemic stroke: A nationwide population-based study. *Cephalalgia* [Internet]. 2016;0333102416642602-. Available from: <http://cep.sagepub.com/content/early/2016/05/04/0333102416642602.long>
37. Velentgas P, Cole JA, Mo J, Sikes CR, Walker AM. Severe vascular events in migraine patients. *Headache*. 2004;44:642–51.
38. Merikangas KR, Fenton BT, Cheng SH, Stolar MJ, Risch N. Association between migraine and stroke in a large-scale epidemiological study of the United States. *Arch. Neurol*. 1997;54:362–8.
39. Buring JE, Hebert P, Romero J, Kittross A, Cook N, Manson J, et al. Migraine and subsequent risk of stroke in the Physicians' Health Study. *Arch. Neurol*. [Internet]. 1995 [cited 2016 Dec 13];52:129–34. Available from: <http://www.ncbi.nlm.nih.gov/pubmed/7848119>
40. Sternfeld B, Stang P, Sidney S. Relationship of migraine headaches to experience of chest pain and subsequent risk for myocardial infarction. *Neurology*. 1995;45:2135–42.
41. D'Andrea G, Hasselmark L, Alecci M, Cananzi A, Perini F, Welch KM. Platelet secretion from dense and alpha-granules in vitro in migraine with or without aura. *J. Neurol. Neurosurg. Psychiatry* [Internet]. 1994 [cited 2016 Dec 13];57:557–61. Available from: <http://www.pubmedcentral.nih.gov/articlerender.fcgi?artid=1072914&tool=pmcentrez&rendertype=abstract>
42. Tietjen GE, Al-Qasbi MM, Athanas K, Dafer RM, Khuder SA. Increased von Willebrand factor in migraine. *Neurology* [Internet]. 2001 [cited 2016 Dec 13];57:334–6. Available from: <http://www.ncbi.nlm.nih.gov/pubmed/11468324>

- 1  
2  
3  
4  
5  
6  
7  
8  
9  
10  
11  
12  
13  
14  
15  
16  
17  
18  
19  
20  
21  
22  
23  
24  
25  
26  
27  
28  
29  
30  
31  
32  
33  
34  
35  
36  
37  
38  
39  
40  
41  
42  
43  
44  
45  
46  
47  
48  
49  
50  
51  
52  
53  
54  
55  
56  
57  
58  
59  
60
43. Pietrobon D, Moskowitz MA. Pathophysiology of migraine. *Annu. Rev. Physiol.* [Internet]. 2013 [cited 2016 Dec 14];75:365–91. Available from: <http://www.ncbi.nlm.nih.gov/pubmed/23190076>
44. Sacco S, Ripa P, Grassi D, Pistoia F, Ornello R, Carolei A, et al. Peripheral vascular dysfunction in migraine: a review. *J. Headache Pain* [Internet]. 2013 [cited 2016 Dec 14];14:80. Available from: <http://www.pubmedcentral.nih.gov/articlerender.fcgi?artid=3849862&tool=pmcentrez&rendertype=abstract>
45. Wahl A, Praz F, Tai T, Findling O, Walpoth N, Nedeltchev K, et al. Improvement of migraine headaches after percutaneous closure of patent foramen ovale for secondary prevention of paradoxical embolism. *Heart* [Internet]. 2010 [cited 2016 Dec 18];96:967–73. Available from: <http://www.ncbi.nlm.nih.gov/pubmed/20538672>
46. Kurth T, Schürks M, Logroscino G, Buring JE. Migraine frequency and risk of cardiovascular disease in women. *Neurology* [Internet]. 2009 [cited 2016 Dec 14];73:581–8. Available from: <http://www.pubmedcentral.nih.gov/articlerender.fcgi?artid=2731618&tool=pmcentrez&rendertype=abstract>
47. Liberopoulos EN, Mikhailidis DP. Could statins be useful in the treatment of patients with migraine? *Headache* [Internet]. 2006 [cited 2016 Dec 15];46:672–5. Available from: <http://www.ncbi.nlm.nih.gov/pubmed/16643563>

**Figure legends:**

**Figure 1:** Summary of how the systematic search was conducted and eligible studies were identified (PRISMA flow diagram).

**Figure 2:** Random effects summary adjusted hazard ratio of stroke according to the stroke type.

HR= Hazard ratio, CI= Confidence interval.

The P-value is for Chi-square test of heterogeneity.

N.B: Haemorrhagic and ischemic stroke outcomes were reported in separate publications for Physician health study and Women health study.

**Figure 3:** Random effects summary adjusted hazard ratio of stroke and all-cause mortality according to the aura status.

HR= Hazard ratio, CI= Confidence interval.

The P-value is for Chi-square test of heterogeneity.

**Table 1:** Baseline characteristics of studies included in the analysis.

| Study (Ref.)           | Year | Country | Design        | Registry                                  | Total subjects* | Enrollment period | Follow-up (years) | Outcomes reported         |
|------------------------|------|---------|---------------|-------------------------------------------|-----------------|-------------------|-------------------|---------------------------|
| Waters et al[8]        | 1983 | Wales   | Prospective   | Rhonda Valley                             | 605/705         | 1967              | 12                | ACM                       |
| Sternfeld et al[40]    | 1995 | USA     | Retrospective | Northern California Kaiser Permanente     | 4319/74962*     | 1971-1973         | 15                | MI                        |
| NHANES1[38]            | 1997 | USA     | Prospective   | NHANES1                                   | 1109/10982      | 1971-1975         | 10                | Stroke                    |
| Hall et al[34]         | 2004 | UK      | Retrospective | General practice research database        | 63575/77239     | 1992-1999         | 3                 | Stroke, ACM and MI        |
| Velentgas et al[37]    | 2004 | USA     | Retrospective | United Health care                        | 130411/130411   | 1995-1999         | 1                 | Stroke, ACM and MI        |
| WHS [21,22]            | 2006 | USA     | Prospective   | Women's Health study                      | 5125/22715      | 1992-1995         | 10                | MACCE, Stroke and MI      |
| PHS [7,39]             | 2007 | USA     | Prospective   | Physician's health study                  | 1449/18635      | 1981-1984         | 16                | MACCE, Stroke and MI      |
| Gudmundsson et al [33] | 2010 | Iceland | Prospective   | Reykjavik study                           | 2023/1371       | 1967-1991         | 26                | Stroke and ACM            |
| Kuo et al [35]         | 2013 | Taiwan  | Retrospective | Taiwan National Health insurance          | 20925/104625    | 2001              | 2                 | Stroke                    |
| Wang et al[32]         | 2014 | Taiwan  | Retrospective | Taiwan National Health insurance          | 11541/11541     | 2001              | 2.5               | Stroke and MI             |
| HUNT2[5]               | 2016 | Norway  | Prospective   | HUNT2 study                               | 6831/31737      | 1995-1997         | 14.1              | ACM                       |
| Peng et al[36]         | 2016 | Taiwan  | Prospective   | Taiwan National Health insurance          | 119017/119107   | 2005-2009         | 3.6               | Stroke                    |
| NHS[12]                | 2016 | USA     | Retrospective | Nurses' health study                      | 17531/98010     | 1989              | 20                | MACCE, Stroke and MI      |
| ARIC[11]               | 2016 | USA     | Prospective   | Atherosclerosis Risk in Communities study | 1622/10053      | 1987-1989         | 20                | Stroke                    |
| WISE[6]                | 2017 | USA     | Prospective   | WISE                                      | 224/693         | 1996-1999         | 6.5               | MACCE, Stroke, ACM and MI |

\*Total patients are reported as migraine/no migraine arms.

ACM: All-cause mortality, CVM: Cardiovascular mortality, MI: Myocardial infarction.

NHANES1: National Health and Nutrition Examination Survey, WHS: Women's health study, PHS: Physician's health study, NHS: Nurses health study, WISE: Women's Ischemia Syndrome Evaluation, HUNT2: The Nord-Trøndelag Health Study, ARIC: Atherosclerosis Risk in Communities study

\*This study included two cohorts with different methods of assessment of migraine.

1  
2  
3  
4  
5  
6  
7  
8  
9  
10  
11  
12  
13  
14  
15  
16  
17  
18  
19  
20  
21  
22  
23  
24  
25  
26  
27  
28  
29  
30  
31  
32  
33  
34  
35  
36  
37  
38  
39  
40  
41  
42  
43  
44  
45  
46  
47  
48  
49  
50  
51  
52  
53  
54  
55  
56  
57  
58  
59  
60

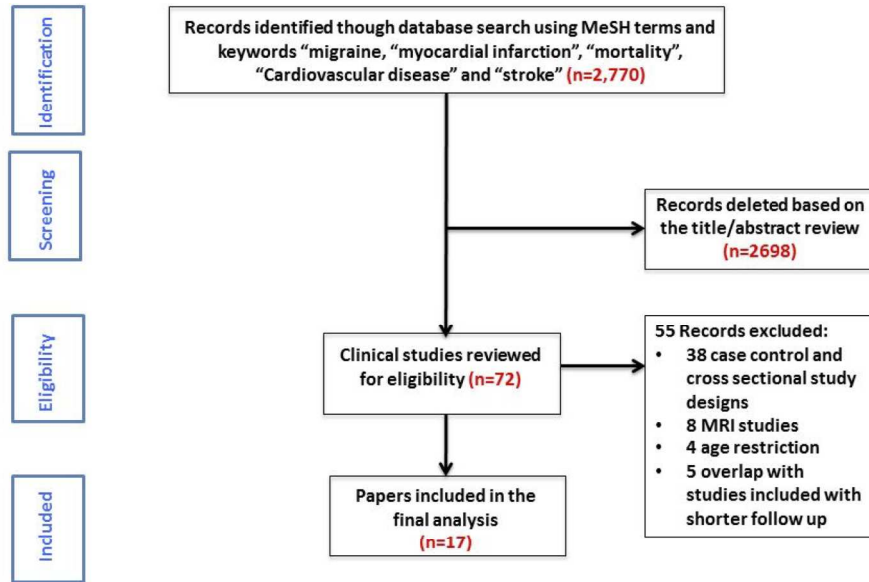

Summary of how the systematic search was conducted and eligible studies were identified (PRISMA flow diagram).

254x190mm (300 x 300 DPI)

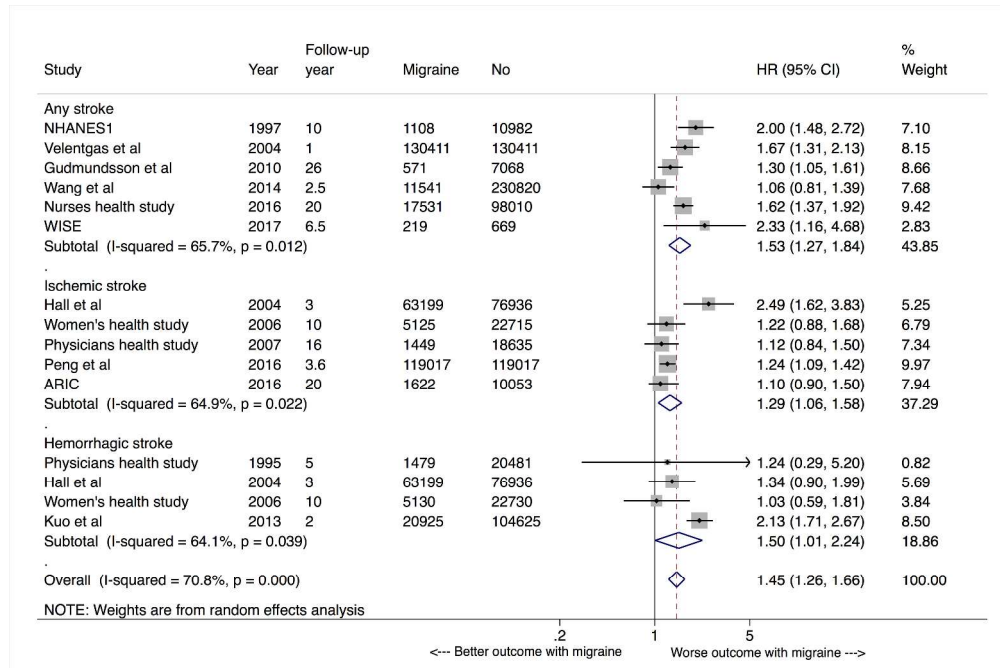

Random effects summary adjusted hazard ratio of stroke according to the stroke type.

HR= Hazard ratio, CI= Confidence interval.

The P-value is for Chi-square test of heterogeneity.

N.B: Haemorrhagic and ischemic stroke outcomes were reported in separate publications for Physician health study and Women health study.

381x254mm (300 x 300 DPI)



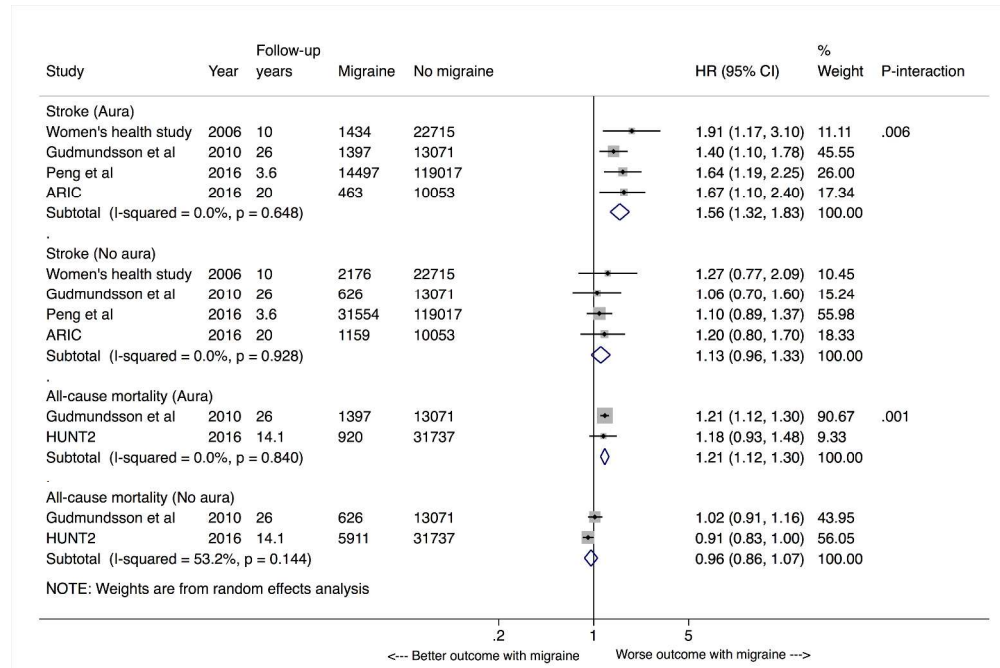

Random effects summary adjusted hazard ratio of stroke and all-cause mortality according to the aura status.

HR= Hazard ratio, CI= Confidence interval.  
The P-value is for Chi-square test of heterogeneity.

381x254mm (300 x 300 DPI)

1  
2  
3 **Supplemental material: quality assessment tool by the Newcastle-Ottawa scale**  
4

5 **Selection:**  
6

7 1: Are cases truly representative or somewhat representative of population? (Yes \*/No)  
8

9 2: Are cases drawn from the same population? (Yes \*/No)  
10

11 3: How was diagnosis of migraine ascertained? (Health records or physician diagnosis \*/self diagnosis)  
12

13 4: Did the study demonstrate that outcome of interest was not present at the beginning of the study? (Yes\*/No)  
14

15 **Comparability:**  
16

17 Did the study adjust for possible confounders in statistical analysis?  
18

19 1: Age and Gender\*  
20

21 2: other additional factors\*  
22

23 **Outcome**  
24

25 1: How was the outcome assessed? (Health records, physician diagnosis, imaging\*/self report or not reported)  
26

27 2: Was follow up duration long enough (>6 months)? (Yes\*/No)  
28

29 3: How was completeness of follow up? (>80%\*/<80%)  
30  
31  
32  
33  
34  
35  
36  
37  
38  
39  
40  
41  
42  
43  
44  
45  
46  
47

1  
2  
3  
4  
5  
6  
7  
8  
9  
10  
11  
12  
13  
14  
15  
16  
17  
18  
19  
20  
21  
22  
23  
24  
25  
26  
27  
28  
29  
30  
31  
32  
33  
34  
35  
36  
37  
38  
39  
40  
41  
42  
43  
44  
45  
46  
47

**Supplemental Table 1:** Quality of included studies by Newcastle-Ottawa scale.

| Study (Ref.)           | Selection | Comparability | Outcome | Quality* |
|------------------------|-----------|---------------|---------|----------|
| Waters et al(8)        | **        |               | ***     | Low      |
| Sternfeld et al(40) *  | **        | **            | **      | Low      |
| NHANES1(38)            | **        | *             | ***     | Low      |
| Hall et al(34)         | ****      | *             | ***     | High     |
| Velentgas et al(37)    | ****      | **            | ***     | High     |
| WHS (21,22)            | ***       | **            | ***     | High     |
| PHS (7,39)             | ***       | **            | ***     | High     |
| Gudmundsson et al (33) | ***       | **            | ***     | High     |
| Kuo et al (35)         | ****      | **            | ***     | High     |
| Wang et al(32)         | ****      | **            | **      | High     |
| HUNT2(5)               | **        | **            | ***     | High     |
| Peng et al(36)         | ****      | **            | ***     | High     |
| NHS(12)                | ****      | **            | ***     | High     |
| ARIC(11)               | ***       | **            | **      | High     |
| WISE(6)                | *         | **            | ***     | Low      |

NHANES1: National Health and Nutrition Examination Survey, WHS: Women's health study, PHS: Physician's health study, NHS: Nurses health study, WISE: Women's Ischemia Syndrome Evaluation, HUNT2: The Nord-Trøndelag Health Study, ARIC: Atherosclerosis Risk in Communities study

\* A study with 7 or more stars out of 9 was considered a high quality study

**Supplemental Table 2:** Variables adjusted for the hazard ratio reported in each study included.

| Study (Ref.)                    | Age | HTN | DM | BMI | Smoking | Alcohol | Exercise | Post-menopausal | OCP | HPL | FH of premature CAD | ASA |
|---------------------------------|-----|-----|----|-----|---------|---------|----------|-----------------|-----|-----|---------------------|-----|
| Waters et al <sup>8</sup>       | ✓   |     |    |     | ✓       |         |          |                 |     |     |                     |     |
| Sternfeld et al <sup>40*</sup>  | ✓   | ✓   | ✓  | ✓   |         |         |          |                 |     | ✓   |                     |     |
| NHANES1 <sup>38</sup>           | ✓   | ✓   | ✓  |     |         |         |          |                 |     |     |                     |     |
| Hall et al <sup>34</sup>        | ✓   | ✓   | ✓  | ✓   | ✓       |         |          |                 | ✓   | ✓   |                     |     |
| Velentgas et al <sup>37</sup>   | ✓   | ✓   | ✓  | ✓   |         |         |          |                 | ✓   | ✓   |                     |     |
| WHS <sup>21,22</sup>            | ✓   | ✓   | ✓  | ✓   | ✓       | ✓       | ✓        | ✓               | ✓   | ✓   | ✓                   | ✓   |
| PHS <sup>7,39</sup>             | ✓   | ✓   | ✓  | ✓   | ✓       | ✓       | ✓        |                 |     | ✓   | ✓                   |     |
| Gudmundsson et al <sup>33</sup> | ✓   | ✓   | ✓  | ✓   | ✓       |         |          |                 | ✓   | ✓   |                     |     |
| Kuo et al <sup>35</sup>         | ✓   | ✓   | ✓  |     |         |         |          |                 |     | ✓   |                     | ✓   |
| Wang et al <sup>32</sup>        | ✓   | ✓   | ✓  |     |         |         |          |                 |     | ✓   |                     |     |
| HUNT2 <sup>5</sup>              | ✓   | ✓   | ✓  | ✓   | ✓       | ✓       | ✓        |                 |     | ✓   |                     |     |
| Peng et al <sup>36</sup>        | ✓   | ✓   | ✓  |     |         |         |          |                 |     | ✓   |                     |     |
| NHS <sup>12</sup>               | ✓   | ✓   | ✓  | ✓   | ✓       | ✓       | ✓        | ✓               | ✓   | ✓   | ✓                   | ✓   |
| ARIC <sup>11</sup>              | ✓   | ✓   | ✓  | ✓   | ✓       | ✓       | ✓        |                 |     | ✓   |                     |     |
| WISE <sup>6</sup>               | ✓   | ✓   | ✓  | ✓   | ✓       |         |          |                 |     | ✓   | ✓                   | ✓   |

\* Adjusted by propensity score matching for chronic renal disease, chronic liver disease, valvular heart disease, smoking, atrial fibrillation, myocardial infarction, and peripheral vascular disease.

HTN: Hypertension, DM: Diabetes mellitus, BMI: Body mass index, OCP: Oral contraceptive pills, HPL: hyperlipidemia, FH: family history, CAD: coronary artery disease, ASA: aspirin. NHANES1: National Health and Nutrition Examination Survey, WHS: Women's health study, PHS: Physician's health study, NHS: Nurses health study, WISE: Women's Ischemia Syndrome Evaluation, HUNT2: The Nord-Trøndelag Health Study, ARIC: Atherosclerosis Risk in Communities study

**Supplemental Table 3:** Methods of assessment of migraine status in study participants

| Study (Ref.)                    | Method of assessment                                                                                 |
|---------------------------------|------------------------------------------------------------------------------------------------------|
| Waters et al <sup>8</sup>       | Questionnaire: Self-reporting symptoms                                                               |
| Sternfeld et al <sup>40 *</sup> | Cohort 1: Questionnaire self-reporting symptoms<br>Cohort 2: Questionnaire about physician diagnosis |
| NHANES1 <sup>38</sup>           | Not reported                                                                                         |
| Hall et al <sup>34</sup>        | Health records (physician diagnosis)                                                                 |
| Velentgas et al <sup>37</sup>   | Health records (physician diagnosis)                                                                 |
| WHS <sup>21,22</sup>            | Questionnaire self-reporting symptoms                                                                |
| PHS <sup>7,39</sup>             | Questionnaire self-reporting symptoms                                                                |
| Gudmundsson et al <sup>33</sup> | Questionnaire self-reporting symptoms                                                                |
| Kuo et al <sup>35</sup>         | Health records (physician diagnosis)                                                                 |
| Wang et al <sup>32</sup>        | Health records (physician diagnosis)                                                                 |
| HUNT2 <sup>5</sup>              | Questionnaire self-reporting symptoms                                                                |
| Peng et al <sup>36</sup>        | Health records (physician diagnosis)                                                                 |
| NHS <sup>12</sup>               | Questionnaire about physician diagnosis                                                              |
| ARIC <sup>11</sup>              | Questionnaire self-reporting symptoms                                                                |
| WISE <sup>6</sup>               | Questionnaire self-reporting symptoms                                                                |

NHANES1: National Health and Nutrition Examination Survey, WHS: Women's health study, PHS: Physician's health study, NHS: Nurses health study, WISE: Women's Ischemia Syndrome Evaluation, HUNT2: The Nord-Trøndelag Health Study, ARIC: Atherosclerosis Risk in Communities study

**Supplemental Table 4:** Baseline patient characteristics of the included studies.

| Study (Ref.)              | Age,%     | Female,% | Hypertension,% | DM,%      | Hyperlipidemia,% | Smoker,% | BMI,<br>kg/m <sup>2</sup> | Aura,% |
|---------------------------|-----------|----------|----------------|-----------|------------------|----------|---------------------------|--------|
| Waters et al(8)           | NR/N<br>R | 100/100  | NR/NR          | NR/N<br>R | NR/NR            | NR/NR    | NR/NR                     | NR     |
| Sternfeld et al(40) *     | 39/42     | 76/52    | NR/NR          | NR/N<br>R | NR/NR            | 38/30    | 25/25                     | NR     |
| NHANES1(38)               | NR/N<br>R | 84/58    | NR/NR          | NR/N<br>R | NR/NR            | NR/NR    | NR/NR                     | NR     |
| Hall et al(34)            | NR/N<br>R | NR/NR    | NR/NR          | NR/N<br>R | NR/NR            | NR/NR    | NR/NR                     | NR     |
| Velentgas et al(37)       | 38/38     | 76/76    | 22/10          | 2/2       | 8/5              | NR/NR    | NR/NR                     | NR     |
| WHS (21,22)               | 54/55     | 100/100  | 27/25          | 2/3       | 3/3              | 11/12    | 26/26                     | 28     |
| PHS (7,39)                | 57/58     | 0/0      | 34/31          | 3/4       | 11/10            | 6/7      | 25/25                     | NR     |
| Gudmundsson et al<br>(33) | 51/54     | 72/46    | 9/9            | 4/4       | NR/NR            | 48/48    | 25/26                     | 69     |
| Kuo et al (35)            | 43/43     | 70/70    | 16/12          | 6/6       | 8/5              | NR/NR    | NR/NR                     | 8.8    |
| Wang et al(32)            | 32/32     | 71/71    | 3/3            | 1/1       | 2/2              | NR/NR    | NR/NR                     | NR     |
| HUNT2(5)                  | 44/53     | 72/47    | NR/NR          | NR/N<br>R | NR/NR            | 31/25    | 26/26                     | 14     |
| Peng et al(36)            | 41/41     | 72/72    | 17/17          | 7/7       | 13/13            | NR/NR    | NR/NR                     | 12     |
| NHS(12)                   | 35/34     | 100/100  | 9/5            | 1/1       | 15/10            | 15/13    | NR/NR                     | NR/NR  |
| ARIC(11)                  | 59/60     | 77/51    | 40/40          | 8/10      | 77/78            | 53/50    | NR/NR                     | 29     |
| WISE(6)                   | 54/59     | 100/100  | 57/59          | 19/26     | 49/57            | 24/19    | NR/NR                     | NR/NR  |

Data is reported as Migraine/non-migraine arms.

**DM:** Diabetes Mellitus, **BMI:** Body mass index, **CAD:** Coronary artery disease, **NR:** Not reported.

**NHANES1:** National Health and Nutrition Examination Survey, **WHS:** Women's health study, **PHS:** Physician's health study, **NHS:** Nurses health study, **WISE:** Women's Ischemia Syndrome Evaluation, **HUNT2:** The Nord-Trøndelag Health Study, **ARIC:** Atherosclerosis Risk in Communities study

1  
2  
3  
4  
5  
6  
7  
8  
9  
10  
11  
12  
13  
14  
15  
16  
17  
18  
19  
20  
21  
22  
23  
24  
25  
26  
27  
28  
29  
30  
31  
32  
33  
34  
35  
36  
37  
38  
39  
40  
41  
42  
43  
44  
45  
46  
47

**Supplemental Table 5:** MACCE definitions in included studies.

| Study                       | Non-fatal stroke | Non-fatal MI | Congestive heart failure | Death due to cardiovascular disease |
|-----------------------------|------------------|--------------|--------------------------|-------------------------------------|
| <b>WHS</b> <sup>21,22</sup> | ✓                | ✓            |                          | ✓                                   |
| <b>PHS</b> <sup>7,39</sup>  | ✓                | ✓            |                          | ✓                                   |
| <b>NHS</b> <sup>12</sup>    | ✓                | ✓            |                          | ✓                                   |
| <b>WISE</b> <sup>6</sup>    | ✓                | ✓            | ✓                        | ✓                                   |

**WHS:** Women’s health study, **PHS:** Physician’s health study, **NHS:** Nurse’s health study, **WISE:** Women’s Ischemia Syndrome Evaluation

**Supplemental Table 6: GRADE assessment tool for quality of evidence**

| № of studies                                                                        | Quality assessment    |              |                          |              |             |                                                                         | Effect            |                    |                                                 | Quality      | Importance |
|-------------------------------------------------------------------------------------|-----------------------|--------------|--------------------------|--------------|-------------|-------------------------------------------------------------------------|-------------------|--------------------|-------------------------------------------------|--------------|------------|
|                                                                                     | Study design          | Risk of bias | Inconsistency            | Indirectness | Imprecision | Other considerations                                                    | № of events       | № of individuals   | HR (95% CI)                                     |              |            |
| <b>Major adverse cardiac and cerebrovascular event (follow up: mean 18.5 years)</b> |                       |              |                          |              |             |                                                                         |                   |                    |                                                 |              |            |
| 4                                                                                   | observational studies | not serious  | not serious <sup>a</sup> | not serious  | not serious | all plausible residual confounding would reduce the demonstrated effect | 332 <sup>b</sup>  | 24329 <sup>b</sup> | 1.42 per Adjusted HR (1.26 to 1.6) <sub>b</sub> | ⊕⊕⊕⊕<br>HIGH |            |
| <b>All-cause mortality (follow up: mean 4.9 years)</b>                              |                       |              |                          |              |             |                                                                         |                   |                    |                                                 |              |            |
| 6                                                                                   | observational studies | not serious  | not serious <sup>a</sup> | not serious  | not serious | all plausible residual confounding would reduce the demonstrated effect | 2695 <sup>b</sup> | 203669             | 0.93 per Adjusted HR (0.78 to 1.1)              | ⊕⊕⊕⊕<br>HIGH |            |
| <b>cardiovascular mortality (follow up: mean 9.3 years)</b>                         |                       |              |                          |              |             |                                                                         |                   |                    |                                                 |              |            |
| 9                                                                                   | observational studies | not serious  | not serious <sup>a</sup> | not serious  | not serious | all plausible residual confounding would reduce the demonstrated effect | 904 <sup>b</sup>  | 226621             | 1.04 per adjusted HR (0.89 to 1.23)             | ⊕⊕⊕⊕<br>HIGH |            |
| <b>Myocardial infarction (follow up: mean 8.8 years)</b>                            |                       |              |                          |              |             |                                                                         |                   |                    |                                                 |              |            |
| 7                                                                                   | observational studies | not serious  | not serious <sup>a</sup> | not serious  | not serious | all plausible residual confounding would reduce the demonstrated effect | 787 <sup>b</sup>  | 229456             | 1.23 per adjusted HR (1.03 to 1.43)             | ⊕⊕⊕⊕<br>HIGH |            |
| <b>Stroke (follow up: mean 5.8 years)</b>                                           |                       |              |                          |              |             |                                                                         |                   |                    |                                                 |              |            |
| 12                                                                                  | observational studies | not serious  | not serious <sup>a</sup> | not serious  | not serious | all plausible residual confounding would reduce the demonstrated effect | 1625 <sup>b</sup> | 372753             | 1.45 per adjusted HR (1.26 to 1.66)             | ⊕⊕⊕⊕<br>HIGH |            |

a. As the heterogeneity was explained by our subgroup analysis and meta-regression.

b. Nurse's Health Study did not report number of events separately in each group



**Supplemental Table 7:** Myocardial infarction (MI) definitions in included studies.

| Study                                | Definition                                                                                                                                           |
|--------------------------------------|------------------------------------------------------------------------------------------------------------------------------------------------------|
| <b>Sternfeld et al</b> <sup>40</sup> | Chart review for International Classification of Diseases (ICD) codes of MI                                                                          |
| <b>Velentgas et al</b> <sup>37</sup> | Chart review for International Classification of Diseases (ICD) codes of MI                                                                          |
| <b>Hall et al</b> <sup>34</sup>      | Chart review for International Classification of Diseases (ICD) codes of MI                                                                          |
| <b>WHS</b> <sup>21,22</sup>          | Occurrence of typical symptoms by World Health Organization definition, in addition to diagnostic electrocardiographic or cardiac enzymes elevation. |
| <b>PHS</b> <sup>7,39</sup>           | Occurrence of typical symptoms by World Health Organization definition, in addition to diagnostic electrocardiographic or cardiac enzymes elevation. |
| <b>NHS</b> <sup>12</sup>             | Occurrence of typical symptoms by World Health Organization definition, in addition to diagnostic electrocardiographic or cardiac enzymes elevation. |
| <b>WISE</b> <sup>6</sup>             | Asking patients about MI diagnosis, then confirming by contacting the referring physician or obtaining health records                                |

**WHS:** Women’s health study, **PHS:** Physician’s health study, **NHS:** Nurse’s health study, **WISE:** Women’s Ischemia Syndrome Evaluation

**Supplemental figure 1:** Funnel plot of major adverse cardiac and cerebrovascular events (MACCE).

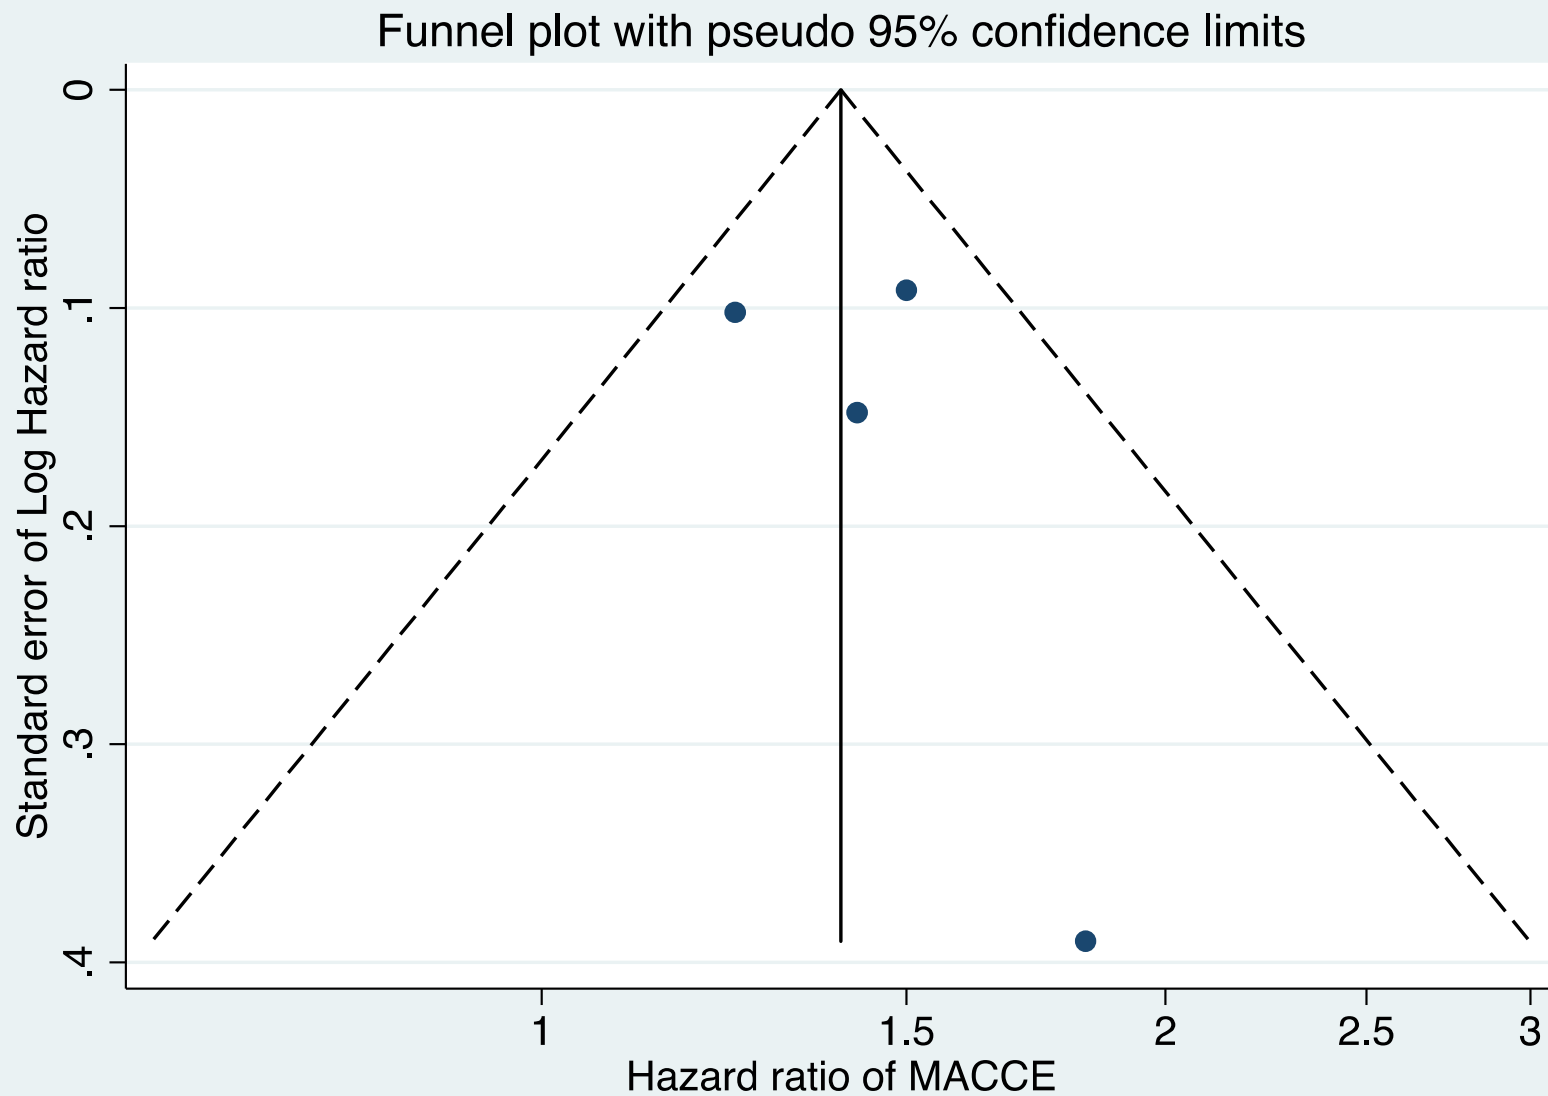

41 **Supplemental figure 2:** Random effects summary adjusted hazard ratio of MACCE.  
42  
43  
44

1  
2  
3  
4  
5  
6  
7  
8  
9  
10  
11  
12  
13  
14  
15  
16  
17  
18  
19  
20  
21  
22  
23  
24  
25  
26  
27  
28  
29  
30  
31  
32  
33  
34  
35  
36  
37  
38  
39  
40  
41  
42  
43  
44  
45  
46  
47

P-value is for Chi-square test of heterogeneity.

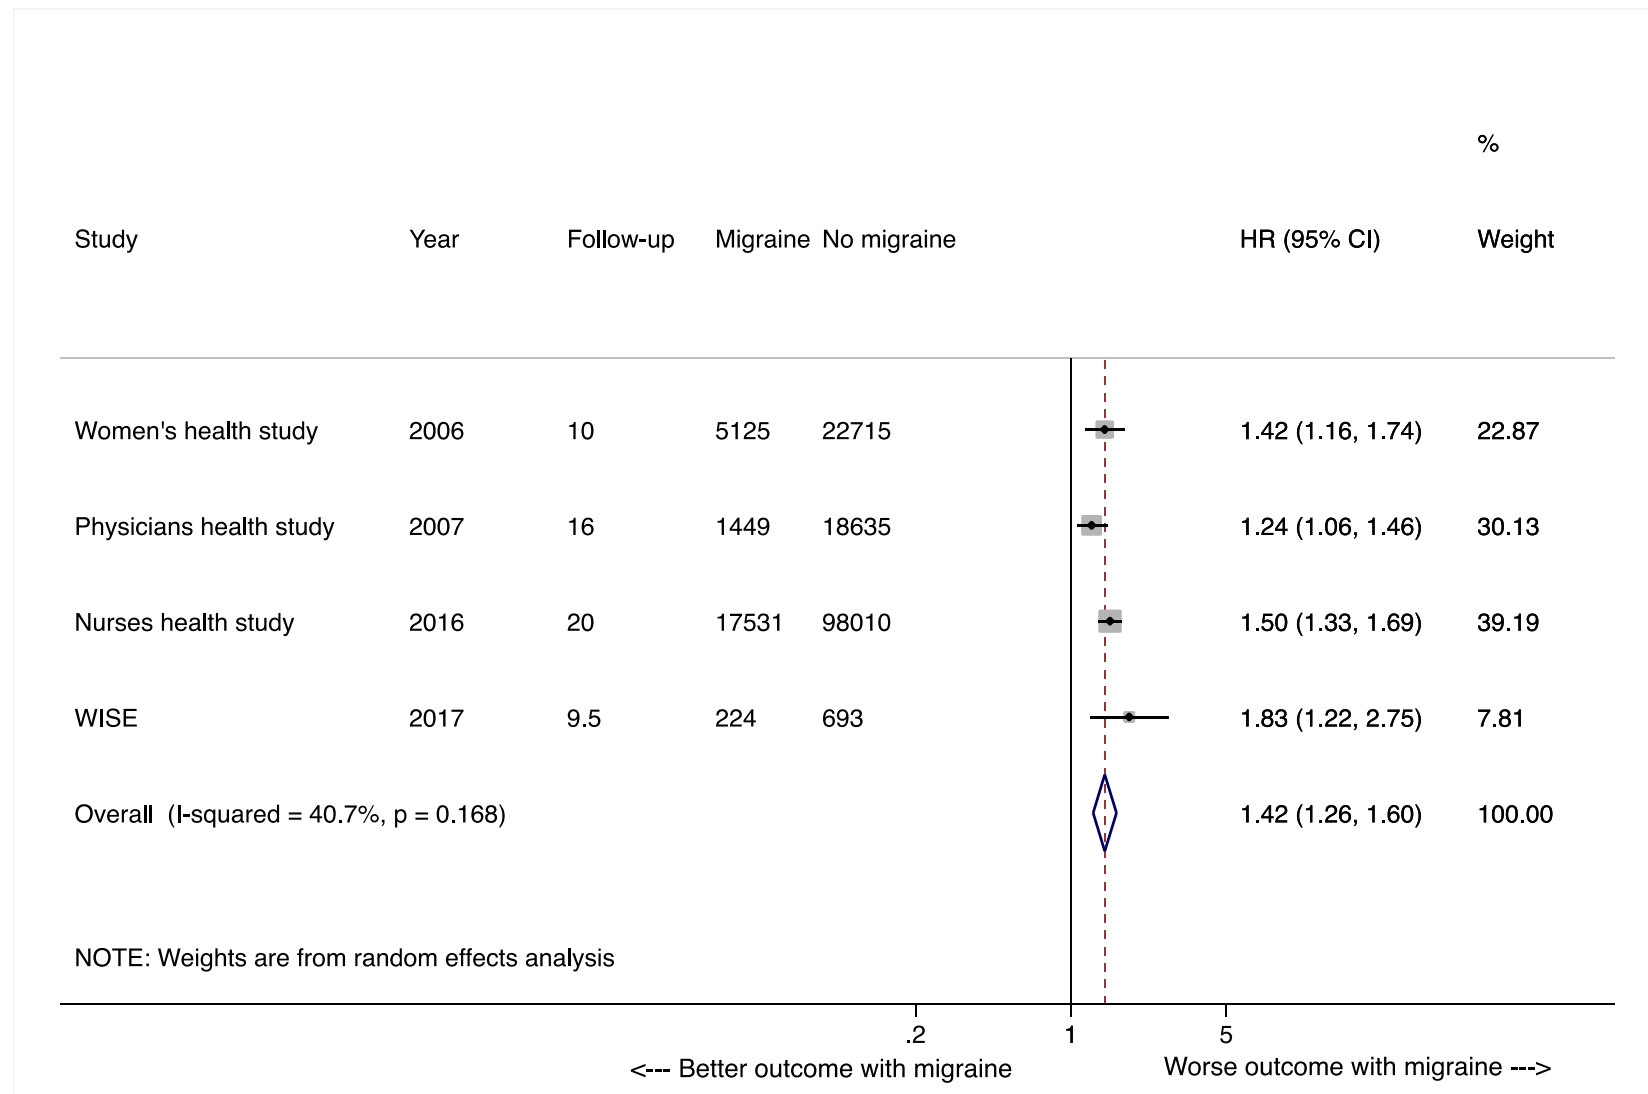

**Supplemental Figure 3:** Random effects summary adjusted hazard ratio of stroke, myocardial infarction and all-cause mortality according to gender.

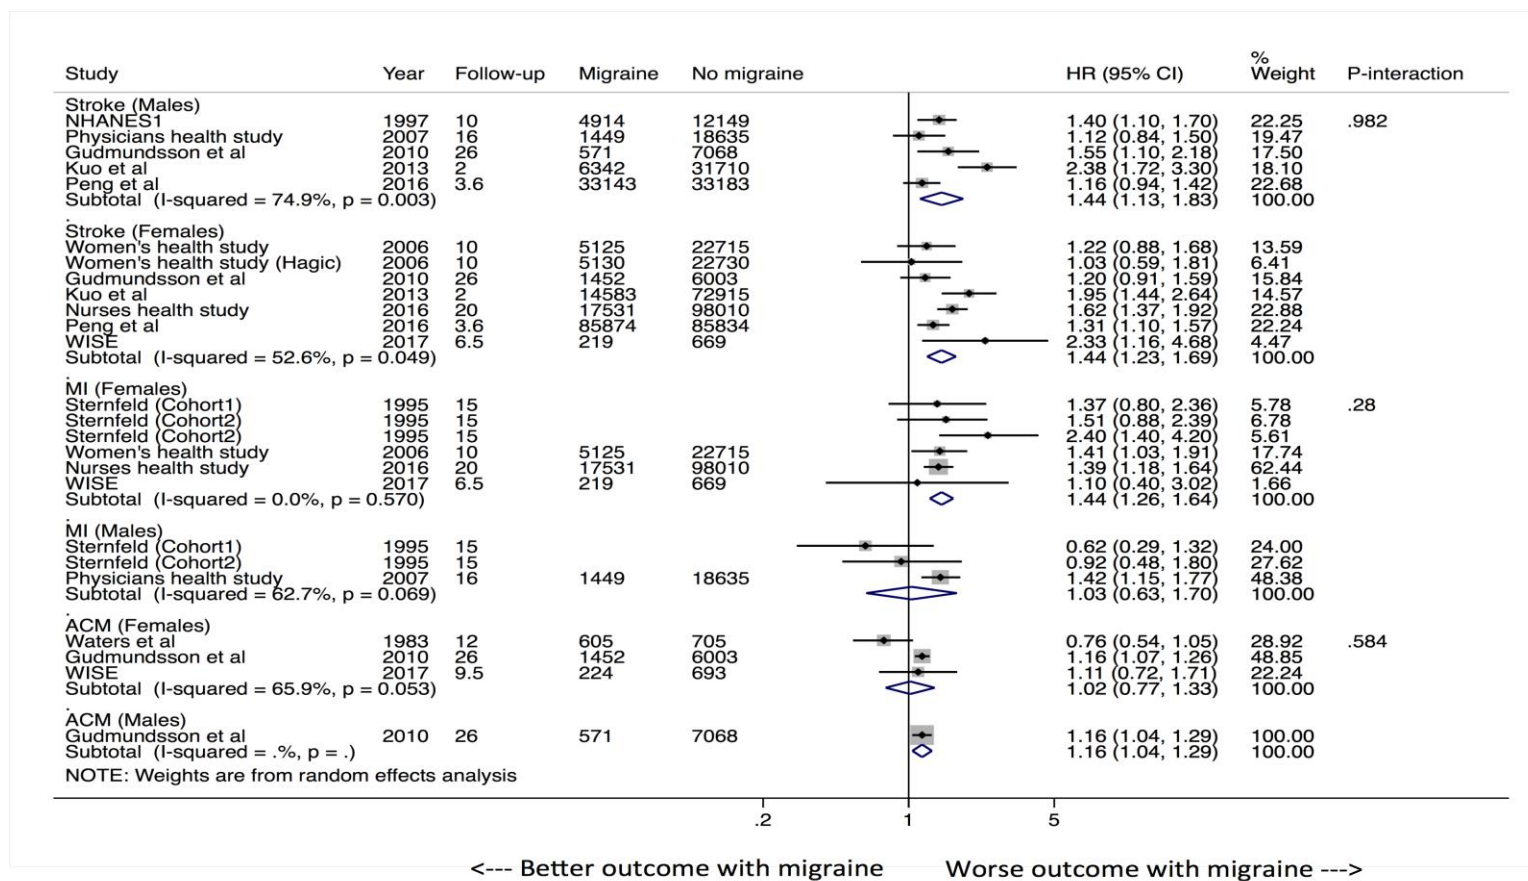

HR= Hazard ratio, CI= Confidence interval, MI= Myocardial infarction, ACM= All-cause mortality.

The P-value is for Chi-square test of heterogeneity.

**Supplemental Figure 4:** Random effects meta-regression analysis of major adverse cardiac and cerebrovascular events (A), stroke (B), myocardial infarction (C) and all-cause mortality (D) by the duration of follow-up of each study.

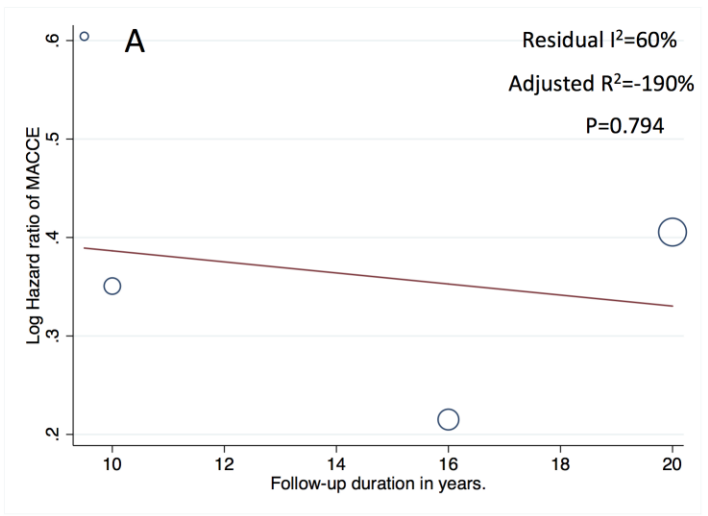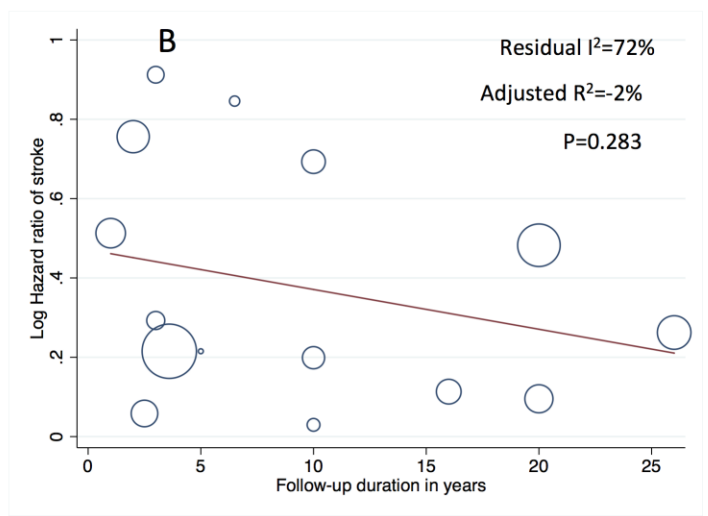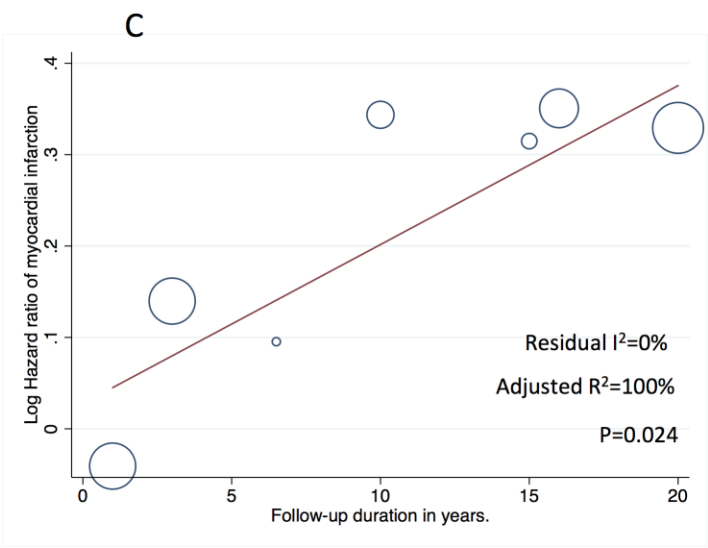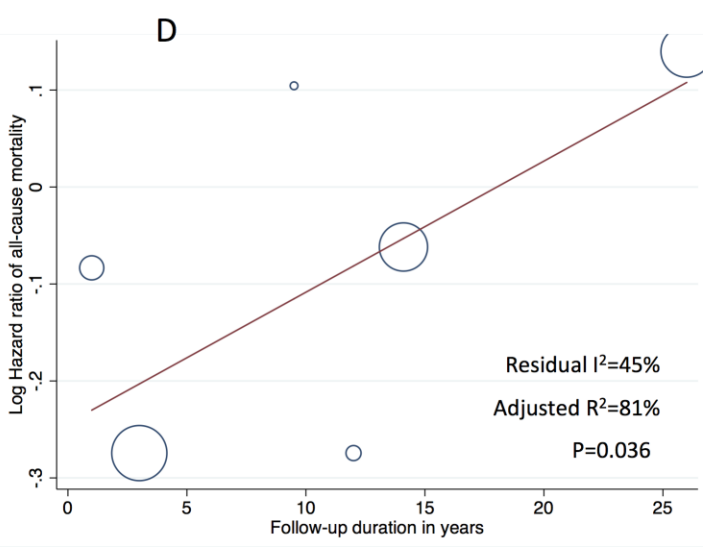

MACCE= Major adverse cardiac and cerebrovascular events.

Supplemental Figure 5: Funnel plot of stroke.

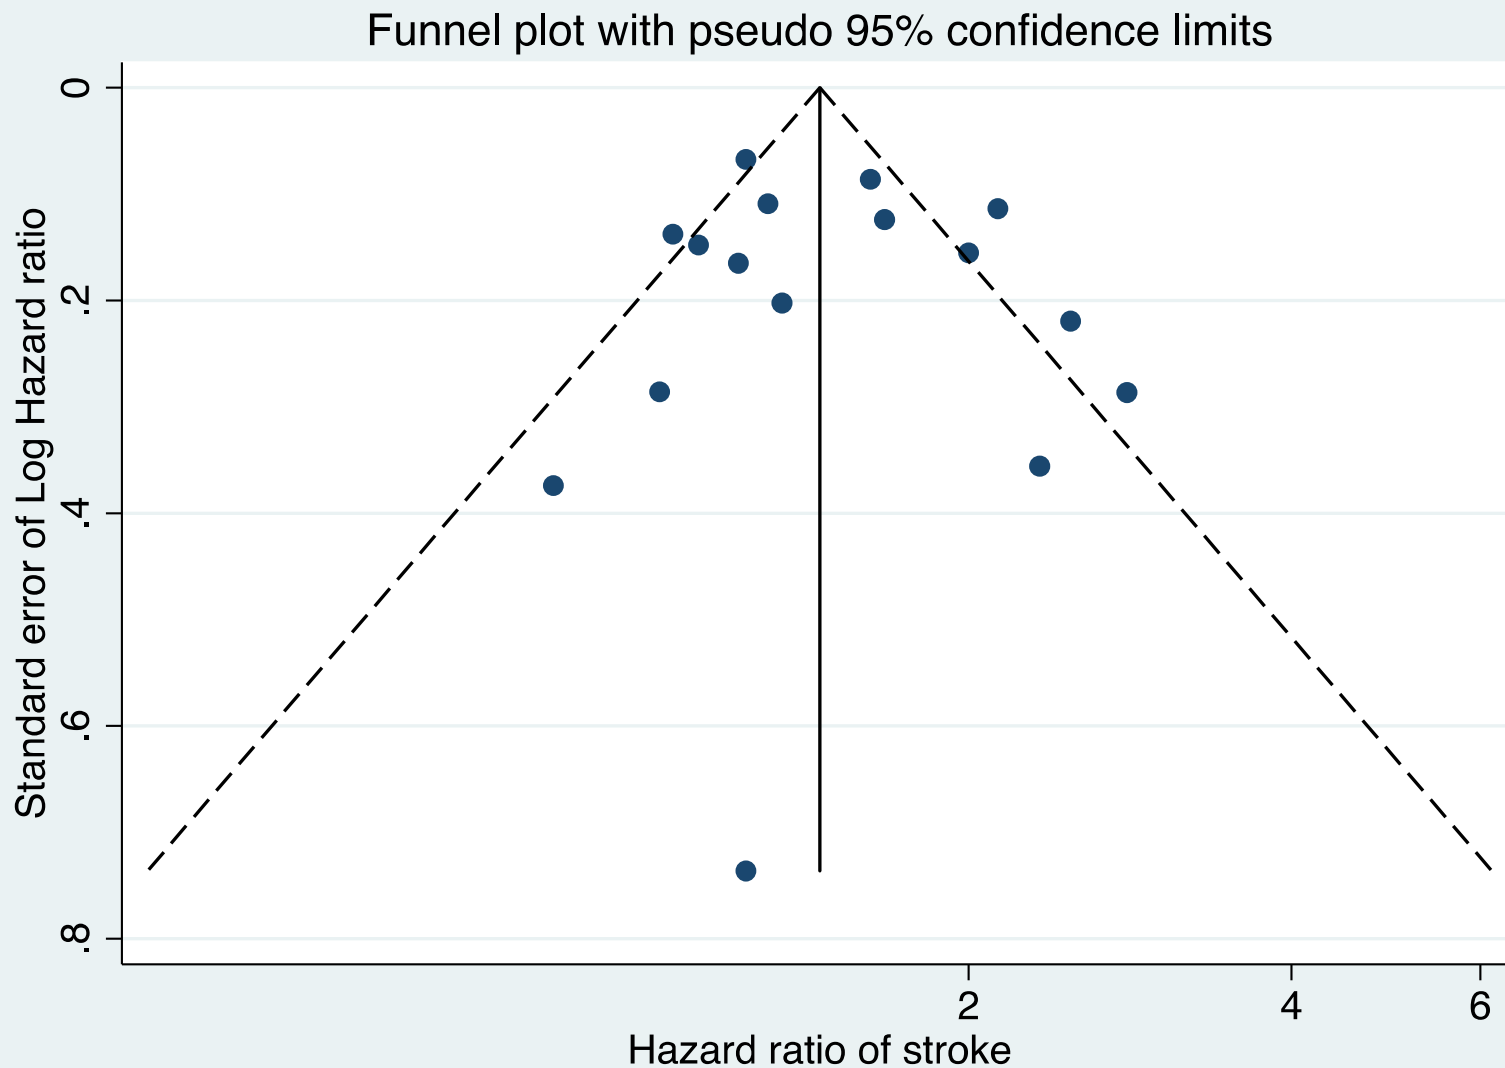

Supplemental figure 6: Funnel plot of myocardial infarction.

1  
2  
3  
4  
5  
6  
7  
8  
9  
10  
11  
12  
13  
14  
15  
16  
17  
18  
19  
20  
21  
22  
23  
24  
25  
26  
27  
28  
29  
30  
31  
32  
33  
34  
35  
36  
37  
38  
39  
40  
41  
42  
43  
44  
45  
46  
47

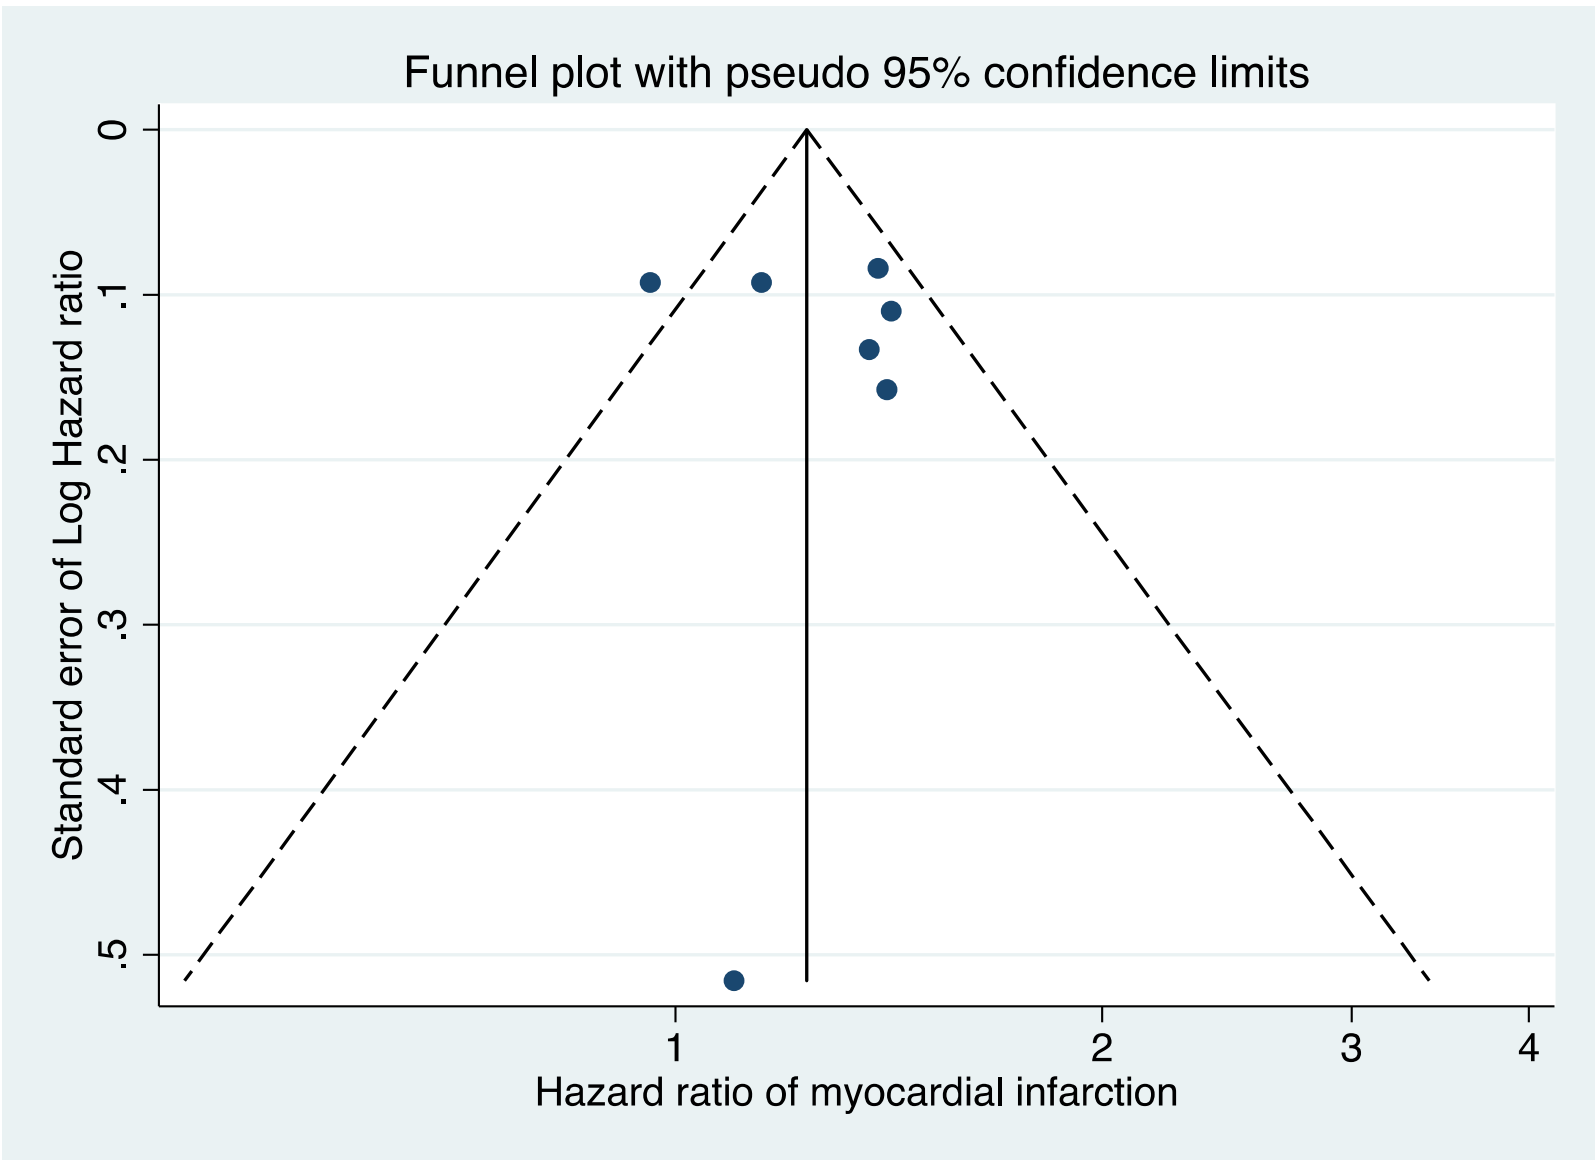

Supplemental figure 7: Random effects summary adjusted hazard ratio of myocardial infarction.

P-value is for Chi-square test of heterogeneity.

Wang et al reported unadjusted events only.

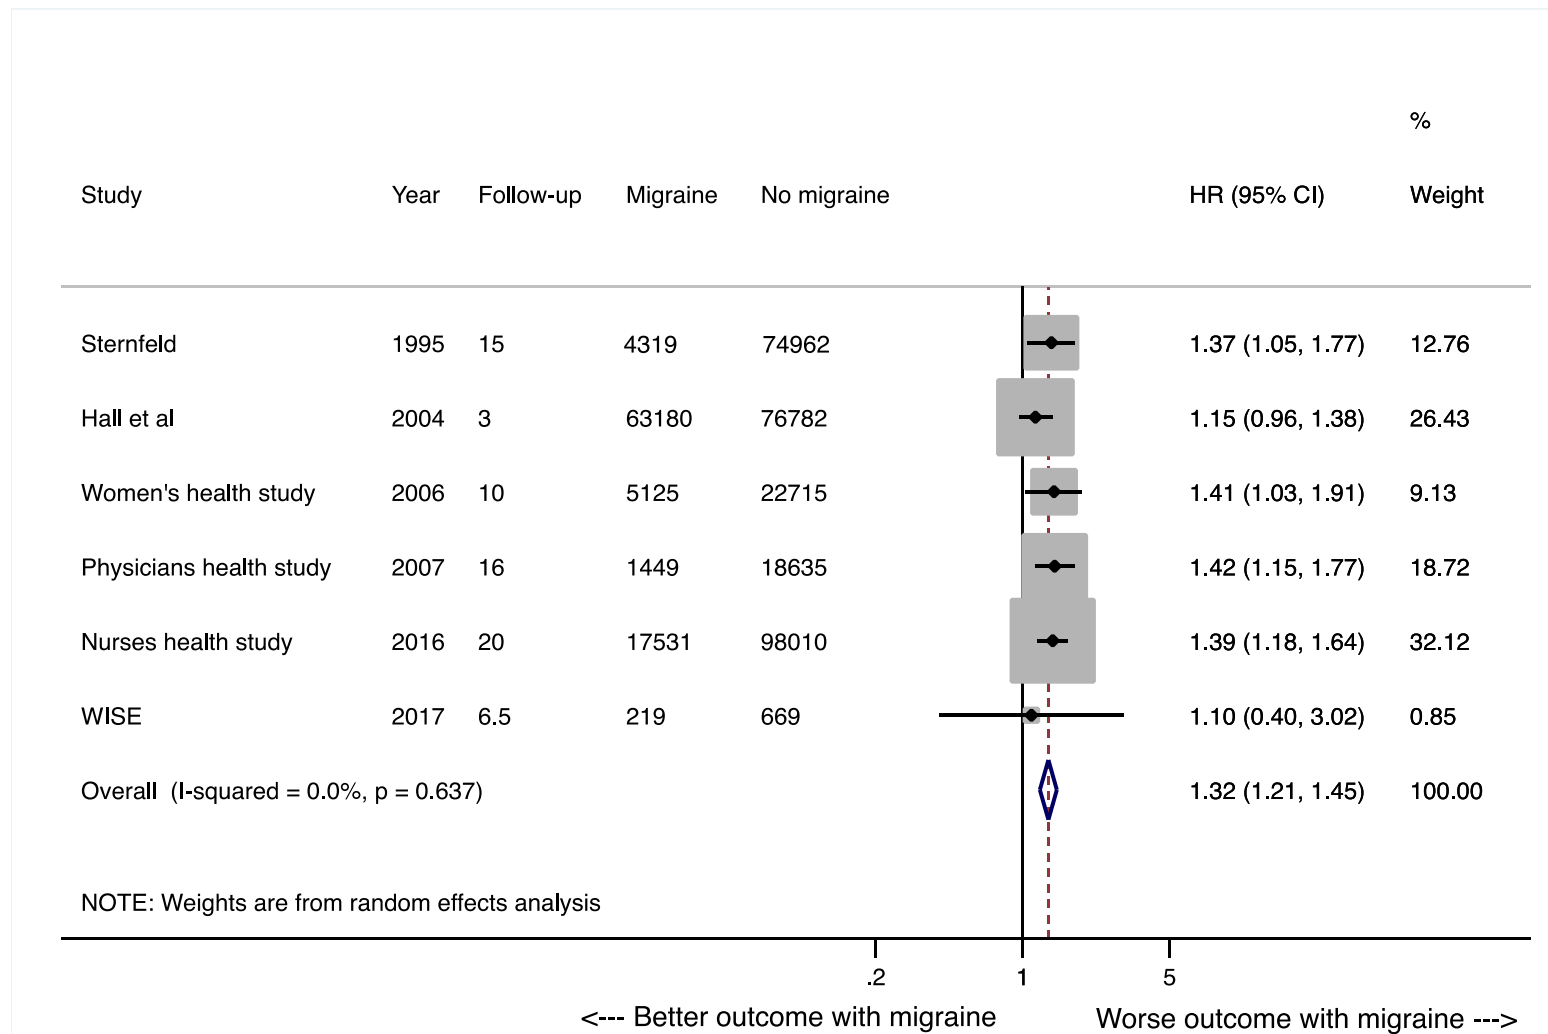

Supplemental figure 8: Funnel plot of all-cause mortality.



1  
2  
3  
4  
5  
6  
7  
8  
9  
10  
11  
12  
13  
14  
15  
16  
17  
18  
19  
20  
21  
22  
23  
24  
25  
26  
27  
28  
29  
30  
31  
32  
33  
34  
35  
36  
37  
38  
39  
40  
41  
42  
43  
44  
45  
46  
47

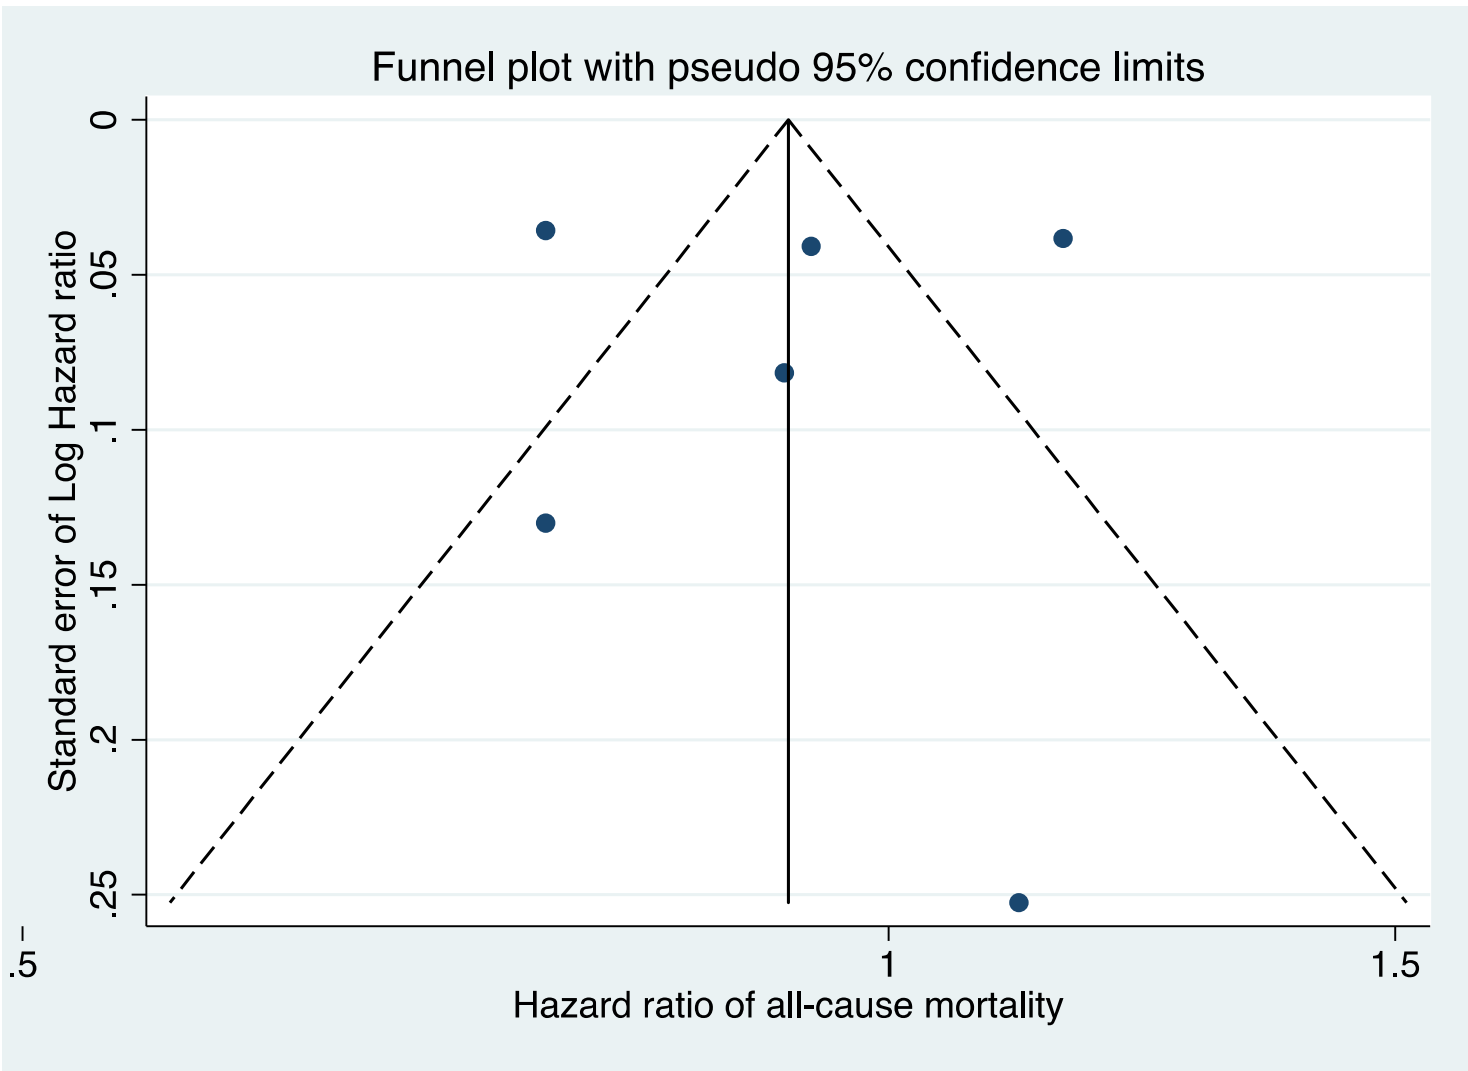

**Supplemental figure 9:** Random effects summary adjusted hazard ratio of all-cause mortality.

P-value is for Chi-square test of heterogeneity.

### All-cause mortality

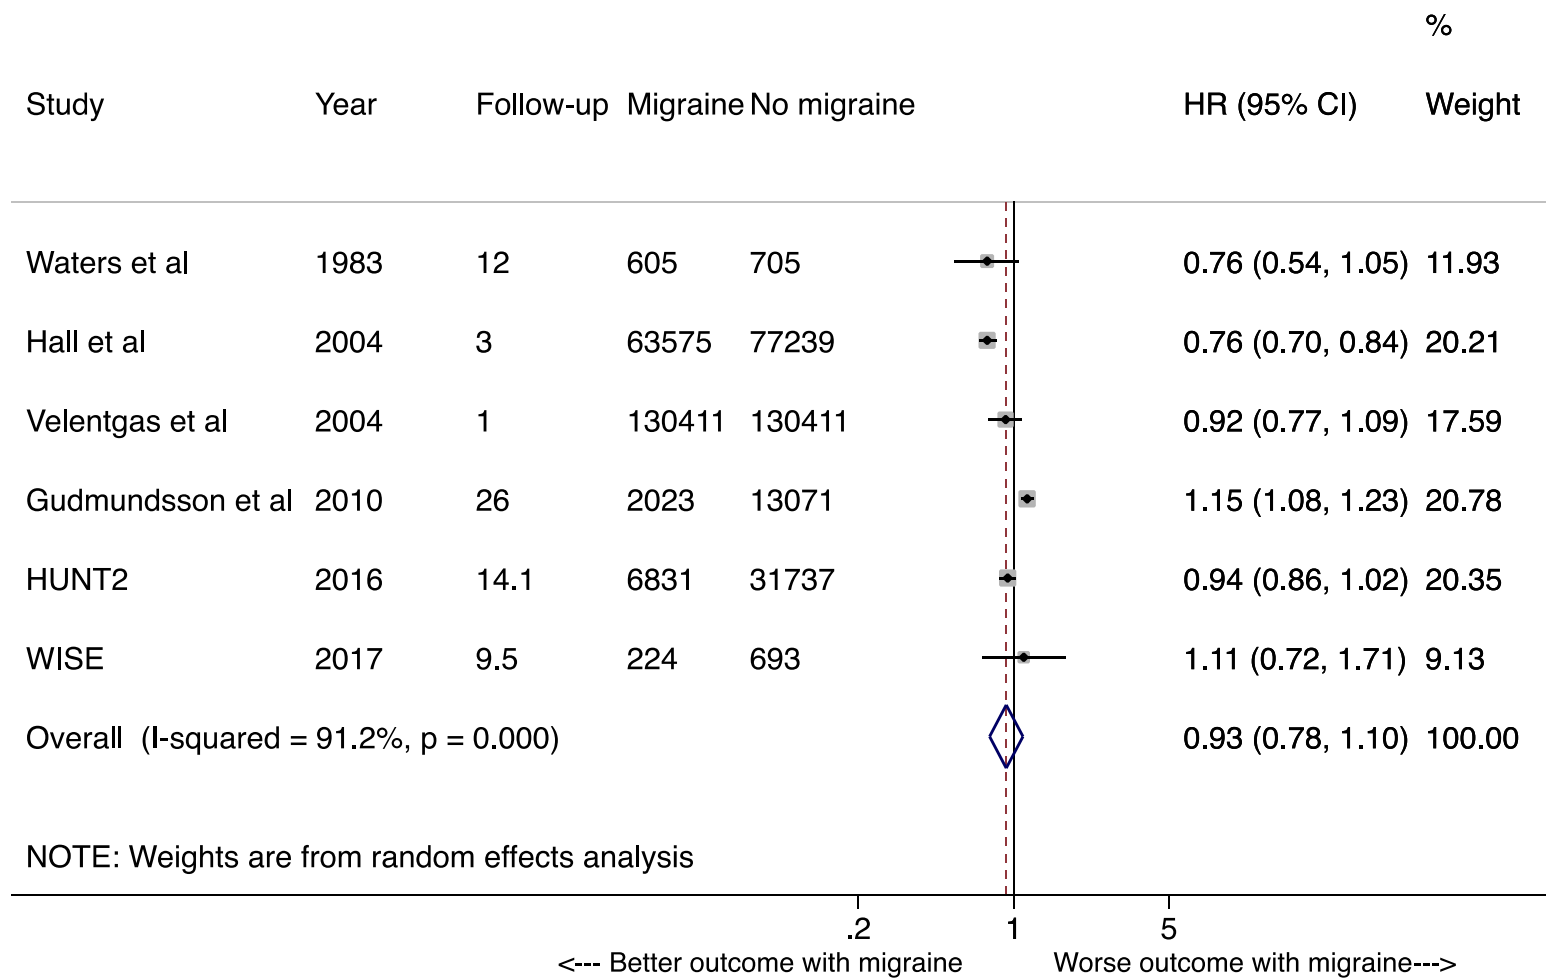

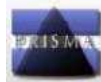

# PRISMA 2009 Checklist

| Section/topic                      | #  | Checklist item                                                                                                                                                                                                                                                                                              | Reported on page # |
|------------------------------------|----|-------------------------------------------------------------------------------------------------------------------------------------------------------------------------------------------------------------------------------------------------------------------------------------------------------------|--------------------|
| <b>TITLE</b>                       |    |                                                                                                                                                                                                                                                                                                             |                    |
| Title                              | 1  | Identify the report as a systematic review, meta-analysis, or both.                                                                                                                                                                                                                                         | 1                  |
| <b>ABSTRACT</b>                    |    |                                                                                                                                                                                                                                                                                                             |                    |
| Structured summary                 | 2  | Provide a structured summary including, as applicable: background; objectives; data sources; study eligibility criteria, participants, and interventions; study appraisal and synthesis methods; results; limitations; conclusions and implications of key findings; systematic review registration number. | 2                  |
| <b>INTRODUCTION</b>                |    |                                                                                                                                                                                                                                                                                                             |                    |
| Rationale                          | 3  | Describe the rationale for the review in the context of what is already known.                                                                                                                                                                                                                              | 4                  |
| Objectives                         | 4  | Provide an explicit statement of questions being addressed with reference to participants, interventions, comparisons, outcomes, and study design (PICOS).                                                                                                                                                  | 4                  |
| <b>METHODS</b>                     |    |                                                                                                                                                                                                                                                                                                             |                    |
| Protocol and registration          | 5  | Indicate if a review protocol exists, if and where it can be accessed (e.g., Web address), and, if available, provide registration information including registration number.                                                                                                                               | 4                  |
| Eligibility criteria               | 6  | Specify study characteristics (e.g., PICOS, length of follow-up) and report characteristics (e.g., years considered, language, publication status) used as criteria for eligibility, giving rationale.                                                                                                      | 5                  |
| Information sources                | 7  | Describe all information sources (e.g., databases with dates of coverage, contact with study authors to identify additional studies) in the search and date last searched.                                                                                                                                  | 4                  |
| Search                             | 8  | Present full electronic search strategy for at least one database, including any limits used, such that it could be repeated.                                                                                                                                                                               | Figure 1           |
| Study selection                    | 9  | State the process for selecting studies (i.e., screening, eligibility, included in systematic review, and, if applicable, included in the meta-analysis).                                                                                                                                                   | 5                  |
| Data collection process            | 10 | Describe method of data extraction from reports (e.g., piloted forms, independently, in duplicate) and any processes for obtaining and confirming data from investigators.                                                                                                                                  | 4,5                |
| Data items                         | 11 | List and define all variables for which data were sought (e.g., PICOS, funding sources) and any assumptions and simplifications made.                                                                                                                                                                       | 5                  |
| Risk of bias in individual studies | 12 | Describe methods used for assessing risk of bias of individual studies (including specification of whether this was done at the study or outcome level), and how this information is to be used in any data synthesis.                                                                                      | 5                  |
| Summary measures                   | 13 | State the principal summary measures (e.g., risk ratio, difference in means).                                                                                                                                                                                                                               | 5,6                |
| Synthesis of results               | 14 | Describe the methods of handling data and combining results of studies, if done, including measures of consistency (e.g., $I^2$ ) for each meta-analysis.                                                                                                                                                   | 5,6                |

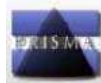

# PRISMA 2009 Checklist

Page 1 of 2

| Section/topic                 | #  | Checklist item                                                                                                                                                                                           | Reported on page #        |
|-------------------------------|----|----------------------------------------------------------------------------------------------------------------------------------------------------------------------------------------------------------|---------------------------|
| Risk of bias across studies   | 15 | Specify any assessment of risk of bias that may affect the cumulative evidence (e.g., publication bias, selective reporting within studies).                                                             | 6                         |
| Additional analyses           | 16 | Describe methods of additional analyses (e.g., sensitivity or subgroup analyses, meta-regression), if done, indicating which were pre-specified.                                                         | 6                         |
| <b>RESULTS</b>                |    |                                                                                                                                                                                                          |                           |
| Study selection               | 17 | Give numbers of studies screened, assessed for eligibility, and included in the review, with reasons for exclusions at each stage, ideally with a flow diagram.                                          | 6                         |
| Study characteristics         | 18 | For each study, present characteristics for which data were extracted (e.g., study size, PICOS, follow-up period) and provide the citations.                                                             | 6, Table 1                |
| Risk of bias within studies   | 19 | Present data on risk of bias of each study and, if available, any outcome level assessment (see item 12).                                                                                                | Supplemental Table 2      |
| Results of individual studies | 20 | For all outcomes considered (benefits or harms), present, for each study: (a) simple summary data for each intervention group (b) effect estimates and confidence intervals, ideally with a forest plot. | Figures 2,3               |
| Synthesis of results          | 21 | Present results of each meta-analysis done, including confidence intervals and measures of consistency.                                                                                                  | 7, Figures 2,3            |
| Risk of bias across studies   | 22 | Present results of any assessment of risk of bias across studies (see Item 15).                                                                                                                          | Supplemental Tables 1 & 6 |
| Additional analysis           | 23 | Give results of additional analyses, if done (e.g., sensitivity or subgroup analyses, meta-regression [see Item 16]).                                                                                    | Supplemental Figures      |
| <b>DISCUSSION</b>             |    |                                                                                                                                                                                                          |                           |
| Summary of evidence           | 24 | Summarize the main findings including the strength of evidence for each main outcome; consider their relevance to key groups (e.g., healthcare providers, users, and policy makers).                     | 9                         |
| Limitations                   | 25 | Discuss limitations at study and outcome level (e.g., risk of bias), and at review-level (e.g., incomplete retrieval of identified research, reporting bias).                                            | 9-11                      |
| Conclusions                   | 26 | Provide a general interpretation of the results in the context of other evidence, and implications for future research.                                                                                  | 11                        |
| <b>FUNDING</b>                |    |                                                                                                                                                                                                          |                           |
| Funding                       | 27 | Describe sources of funding for the systematic review and other support (e.g., supply of data); role of funders for the systematic review.                                                               | 12                        |

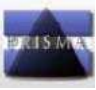

# PRISMA 2009 Checklist

1  
2  
3  
4  
5  
6  
7  
8  
9  
10  
11  
12  
13  
14  
15  
16  
17  
18  
19  
20  
21  
22  
23  
24  
25  
26  
27  
28  
29  
30  
31  
32  
33  
34  
35  
36  
37  
38  
39  
40  
41  
42  
43  
44  
45  
46  
47

doi:10.1371/journal.pmed1000097

For more information, visit: [www.prisma-statement.org](http://www.prisma-statement.org).

Page 2 of 2

For peer review only

# BMJ Open

## Migraine and the risk of cardiovascular and cerebrovascular events: A meta-analysis of 16 cohort studies including 1,151,407 subjects

|                                 |                                                                                                                                                                                                                                                                                                                                                                                                                                                                                                                                                                                                                               |
|---------------------------------|-------------------------------------------------------------------------------------------------------------------------------------------------------------------------------------------------------------------------------------------------------------------------------------------------------------------------------------------------------------------------------------------------------------------------------------------------------------------------------------------------------------------------------------------------------------------------------------------------------------------------------|
| Journal:                        | <i>BMJ Open</i>                                                                                                                                                                                                                                                                                                                                                                                                                                                                                                                                                                                                               |
| Manuscript ID                   | bmjopen-2017-020498.R1                                                                                                                                                                                                                                                                                                                                                                                                                                                                                                                                                                                                        |
| Article Type:                   | Research                                                                                                                                                                                                                                                                                                                                                                                                                                                                                                                                                                                                                      |
| Date Submitted by the Author:   | 20-Dec-2017                                                                                                                                                                                                                                                                                                                                                                                                                                                                                                                                                                                                                   |
| Complete List of Authors:       | Mahmoud, Ahmed; University of Florida, Medicine<br>Mentias, Amgad; University of Iowa,<br>Elgendy, Akram; University of Florida<br>Qazi, Abdul; University of Iowa<br>Barakat, Amr F. ; University of Pittsburgh Department of Medicine<br>Saad, Marwan; University of Arkansas for Medical Sciences<br>Mohsen, Ala; University of Iowa<br>Abuzaid, Ahmed; Sidney Kimmel Medical College at Thomas Jefferson<br>University/Christiana Care Health System<br>Mansoor, Hend; University of Florida<br>Mojadidi, Mohammad ; University of Florida<br>Elgendy, Islam; Division of Cardiovascular Medicine, University of Florida, |
| <b>Primary Subject Heading</b>: | Cardiovascular medicine                                                                                                                                                                                                                                                                                                                                                                                                                                                                                                                                                                                                       |
| Secondary Subject Heading:      | Epidemiology                                                                                                                                                                                                                                                                                                                                                                                                                                                                                                                                                                                                                  |
| Keywords:                       | Cardiac Epidemiology < CARDIOLOGY, Myocardial infarction < CARDIOLOGY, Migraine < NEUROLOGY, Stroke < NEUROLOGY                                                                                                                                                                                                                                                                                                                                                                                                                                                                                                               |
|                                 |                                                                                                                                                                                                                                                                                                                                                                                                                                                                                                                                                                                                                               |

SCHOLARONE™  
Manuscripts

**Migraine and the risk of cardiovascular and cerebrovascular events: A meta-analysis of 16 cohort studies including 1,151,407 subjects**

Ahmed N. Mahmoud, MD <sup>a\*</sup>; Amgad Mentias, MD <sup>b\*</sup>; Akram Elgendy, MD <sup>a</sup>; Abdul Qazi, MD <sup>b</sup>; Amr Barakat, MD <sup>c</sup>; Marwan Saad, MD, PhD <sup>d</sup>; Ala Mohsen, MD <sup>b</sup>; Ahmed Abuzaid, MD <sup>e</sup>; Hend Mansoor, PharmD, MS;<sup>f</sup> Mohammad K. Mojadidi, MD;<sup>a</sup> and Islam Y. Elgendy, MD<sup>a</sup>

<sup>a</sup> Department of Medicine, Division of Cardiovascular Medicine, University of Florida, Gainesville, FL

<sup>b</sup> Department of Medicine, Division of Cardiovascular Medicine, University of Iowa Carver College of Medicine, Iowa city, IA

<sup>c</sup> Department of Cardiology, University of Pittsburgh, PA

<sup>d</sup> Department of Medicine, Division of Cardiovascular Medicine, University of Arkansas for Medical Sciences, Little Rock, AR

<sup>e</sup> Department of Cardiovascular Medicine, Jefferson University Hospital/Christiana Care Health System, Newark, DE

<sup>f</sup> Department of Health Services Research, College of Public Health, University of Florida, Gainesville, FL

\*Both authors contributed equally to the current manuscript.

**Running title:** Migraine and cardiovascular outcomes

**Word count:** 3896 (excluding abstract and references)

**Disclosures and funding:** None

**Corresponding author:**

Islam Y. Elgendy, MD, FESC, FACP  
Department of Medicine, Division of Cardiovascular Medicine.  
University of Florida.  
1600 SW Archer road, Gainesville, FL, USA.  
32610  
Tel: 352.273.9089  
Fax: 352.392.3606  
Email: iyelgendy@gmail.com

**Abstract:**

*Objectives:* To perform an updated meta-analysis to evaluate the long-term cardiovascular and cerebrovascular outcomes among migraineurs.

*Setting:* A meta-analysis of cohort studies performed according to the Preferred Reporting Items for Systematic Reviews and Meta-Analyses guidelines.

*Data Sources:* The MEDLINE, Web of Science, and Cochrane Central Register of Controlled Trials (CENTRAL) databases were searched for relevant articles.

*Participants:* A total of 16 cohort studies with 394,942 migraineurs and 757,465 non-migraineurs were analysed.

*Primary and Secondary Outcome Measures:* Major cardiovascular and cerebrovascular adverse events (MACCE), stroke (i.e., ischemic, haemorrhagic or non-specified), myocardial infarction (MI), and all-cause mortality.

*Data Analysis:* Summary adjusted hazard ratios (HR) were calculated by random effects Der-Simonian and Liard model. The risk of bias was assessed by Newcastle-Ottawa scale.

*Results:* Migraine was associated with higher risk of MACCE (adjusted HR 1.42, 95% CI 1.26-1.60,  $P < 0.001$ ,  $I^2 = 40\%$ ) driven by a higher risk of stroke (adjusted HR 1.41, 95% CI 1.25-1.61,  $P < 0.001$ ,  $I^2 = 72\%$ ), and MI (adjusted HR 1.23, 95% CI 1.03-1.43,  $P = 0.006$ ,  $I^2 = 59\%$ ). There was no difference in the risk of all-cause mortality (adjusted HR 0.93, 95% CI 0.78-1.10,  $P = 0.38$ ,  $I^2 = 91\%$ ), with considerable degree of statistical heterogeneity between the included studies. The presence of aura appeared to be an effect modifier for stroke (adjusted HR aura 1.56, 95% CI 1.30-1.87 versus adjusted HR no aura 1.11, 95% CI 0.94-1.31,  $P_{\text{interaction}} = 0.01$ ) and all-cause mortality (adjusted HR Aura 1.20, 95% CI 1.12-1.30 versus adjusted HR No aura 0.96, 95% CI 0.86-1.07,  $P_{\text{interaction}} < 0.001$ ).

*Conclusion:* Migraine headaches appear to be associated with an increased risk of cardiovascular and cerebrovascular events on the long-term. This effect was due to an increased risk of stroke (both ischaemic and haemorrhagic) and MI. There was a moderate to severe degree of heterogeneity for the outcomes, which was partly explained by the presence of aura.

*Registration:* PROSPERO CRD42016052460.

No funding was provided for this study from any source.

**Keywords:** Migraine; Cardiovascular outcomes; Cerebrovascular outcomes; Myocardial infarction; Stroke; Mortality



**Article Summary:***Strengths and Limitations of this study:*

- Updated meta-analysis of cohort studies to evaluate the long-term cardiovascular and cerebrovascular outcomes of migraineurs compared with non-migraineurs.
- The quality of the included trials and the risk of bias were assessed using the components described by the Newcastle-Ottawa scale.
- Multiple subgroup and meta-regression analyses were conducted.
- The limitations include the variation in the methods of ascertainment of the migraine diagnosis and the outcomes among the studies.

For peer review only

## INTRODUCTION

1  
2  
3 Migraine headache is considered the most common primary headache syndrome worldwide, with a prevalence  
4 of 12% in the United States. [1] The estimated one-year prevalence of migraine is 5.6% in males and 17.1% in  
5 females. [1] The association between migraine and cardiovascular and cerebrovascular events has been a  
6 field of continuous interest. Migraine headaches, especially those complicated with aura, have been linked with  
7 cerebral hypoperfusion, systemic vasculopathy, endothelial dysfunction and hypercoagulable state. [2–4]  
8  
9 Theoretically, these factors might increase the risk of various cardiovascular and cerebrovascular adverse  
10 events. However, studies that investigated an association between migraine and cardiovascular and  
11 cerebrovascular outcomes demonstrated inconsistent associations. [5–8] Prior meta-analyses assessing the  
12 association between migraines and cardiovascular and cerebrovascular outcomes have been limited with a  
13 high degree of statistical heterogeneity for the outcomes, [9] and inclusion of case-control studies, which do not  
14 allow for assessment of longitudinal follow-up compared with cohort studies. [10] More recently, some cohorts  
15 reported the outcomes for extended follow-up. [6,11,12] Thus, the aim of this study was to conduct a  
16 comprehensive meta-analysis to evaluate the association of migraine on cardiovascular and cerebrovascular  
17 outcomes on long-term follow-up.  
18  
19  
20  
21  
22  
23  
24  
25  
26  
27  
28  
29  
30  
31  
32  
33  
34  
35

## METHODS

### *Data sources:*

36  
37  
38  
39  
40  
41  
42 An electronic search of the MEDLINE, Web of Science, and Cochrane Collaboration of Clinical Trials was  
43 performed from inception until December 2017 without language restriction, using keywords: “migraine”,  
44 “stroke”, “myocardial infarction”, “mortality” and “cardiovascular outcomes” (**Supplemental Table 1**).  
45  
46 Bibliographies of the included studies, relevant review articles, and meta-analyses were manually searched for  
47 any potential missed studies. The major cardiovascular conferences and proceedings, e.g. American College  
48 of Cardiology (ACC) and American Heart Association (AHA) conferences were screened for any abstracts  
49 addressing this topic. The current meta-analysis was registered with the International Prospective Register for  
50 Systemic Reviews or PROSPERO (CRD42016052460), and conducted according to the Meta-analysis Of  
51  
52  
53  
54  
55  
56  
57  
58  
59  
60

1 Observational Studies in Epidemiology (MOOSE) group and the Preferred Reporting Items for Systematic  
2 Reviews and Meta-Analyses (PRISMA) guidelines. [13,14]  
3  
4  
5  
6  
7

8 *Selection criteria and Data extraction:*  
9

10  
11 Observational cohort studies evaluating cardiovascular and cerebrovascular outcomes in adult subjects with  
12 migraine were included. In order to be included, studies were required to have reported outcomes in both a  
13 migraine and no migraine arm. Outcomes in non-migraine headaches were not included in our analysis. If a  
14 studied population reported more than one publication, the outcomes were preferentially reported at the  
15 longest follow-up duration. Since the aim was to determine the association of migraine on longitudinal follow-  
16 up, case-control or cross sectional studies were excluded. [15] Data were extracted by 2 independent groups,  
17 and revised by the second author (A.M.) for accuracy. Any discrepancy was resolved by consensus among the  
18 authors.  
19  
20  
21  
22  
23  
24  
25  
26  
27  
28  
29  
30

31 *Outcomes:*  
32

33  
34 The outcomes assessed in this study included: major cardiovascular and cerebrovascular adverse events  
35 (MACCE), stroke (i.e., ischemic, haemorrhagic or non-specified), myocardial infarction (MI), and all-cause  
36 mortality. All-cause mortality was evaluated, rather than cardiovascular mortality, as all-cause mortality is  
37 considered a preferable outcome in the evaluation of cardiovascular disease; [16] this would additionally  
38 increase the number of events and statistical power to detect any potential difference.  
39  
40  
41  
42  
43  
44  
45  
46  
47  
48

49 *Quality assessment:*  
50

51  
52 The quality of evidence was assessed at both the individual study level and outcome level. The Newcastle-  
53 Ottawa scale was used for assessment of the risk of bias of each study included. A study was considered high  
54 quality if it achieved 7 out of 9 points. **(Supplemental Material)** The Grades of Recommendation, Assessment,  
55  
56  
57  
58  
59

1 Development and Evaluation (GRADE) tool was used for assessment of the overall quality of evidence for  
2 each outcome. [17] This tool specifies 4 levels of quality (high, moderate, low and very low) depending on the  
3 design of the included studies, indirectness of evidence, unexplained heterogeneity or inconsistency of results,  
4 imprecision of the results, and high probability of publication bias.  
5  
6  
7  
8  
9  
10  
11

### 12 *Statistical analysis:*

13  
14  
15 All descriptive analyses were conducted using weighted means and ranges for continuous variables and  
16 weighted frequencies for categorical variables, with the weight corresponding to the sample size of each study.  
17 Since the included studies were cohort in design, risk ratio (RR) or hazards ratio (HR) with 95% confidence  
18 intervals (CI) were chosen to represent the effect size. For each outcome, an unadjusted summary RR was  
19 calculated using the reported events in both migraineurs and non-migraineurs arms. [18] The main summary  
20 effect size for each outcome was calculated using the adjusted HR or RR reported by each study. This was  
21 done to ensure a more accurate estimation of effect sizes after adjustment for potential confounders. If a study  
22 reported the effect size as OR, it was converted to RR using a previously described formula. [19] Both  
23 unadjusted and adjusted outcomes were calculated by random effects model using the Der-Simonian and  
24 Laird model. [18] A random effects model was selected as we anticipated some degree of statistical  
25 heterogeneity for the outcomes, as demonstrated in previous meta-analyses. Publication bias was assessed  
26 by both Egger's test and visual funnel plots. [20] The degree of statistical heterogeneity was evaluated by  $I^2$   
27 statistic. [17]  
28  
29  
30  
31  
32  
33  
34  
35  
36  
37  
38  
39  
40  
41  
42  
43

44 As prior studies had suggested that aura is a potential effect modifier,[21,22] a subgroup analysis was  
45 conducted to assess the impact of aura on each outcome, whenever feasible. Another pre-specified subgroup  
46 analysis was performed according to sex (i.e., females versus males), whenever applicable. Random effects  
47 meta-regression analyses were conducted to evaluate the impact of follow-up duration, as well as the midpoint  
48 of the enrolment period on the individual outcomes in the studies. A pre-specified sensitivity analysis was  
49 performed for high quality studies only as assessed by the Newcastle-Ottawa scale. All analyses were  
50 considered statistically significant if the P-value was <0.05 and all effect sizes were calculated with 95% CI.  
51  
52  
53  
54  
55  
56  
57  
58  
59  
60

1 The statistical analysis was conducted using STATA 9 software version 14 (StataCorp, College Station,  
2 Texas).  
3  
4  
5  
6  
7  
8

## 9 RESULTS

### 10 *Included studies:*

11  
12 The initial search yielded 2,836 articles (**Figure 1**), of which 2,758 were excluded upon revision of the titles and  
13 abstracts. Among the remaining 78 studies, 43 were excluded due to case control or cross sectional design, 8  
14 studies evaluated subclinical brain changes, 5 studies reported earlier results in overlapping cohorts, [23–27] 3  
15 studies restricted the inclusion to a certain age group either pediatric [28] or elderly subjects (>65, and 50  
16 years respectively). [29,30] One study was excluded since it focused only on cardiac related mortality [31].  
17  
18 Eighteen articles reporting 16 studies were included in the final analysis with a total number of 1,152,407  
19 subjects: 394,942 migraineurs and 757,465 non-migraineurs. [5–8,11,12,21,22,32–41] In the Women’s Health  
20 Study, all outcomes were reported in one publication except haemorrhagic stroke, which was reported  
21 separately. [21,22] Similarly, in the Physician’s Health Study, haemorrhagic stroke was reported in a separate  
22 publication. [7,39]  
23  
24  
25  
26  
27  
28  
29  
30  
31  
32  
33  
34

35 Study characteristics are shown in the **Table**. The included studies were from 7 countries and with a  
36 follow-up duration ranging from 1 to 26 years. Overall, 12 studies were high quality by the Newcastle-Ottawa  
37 scale, [5,7,12,21,22,32–37,41] while the remaining 4 were considered of low quality (**Supplemental Table 2**).  
38 [6,8,38,40] All of the included studies adjusted the HR by age and most of them also adjusted for hypertension,  
39 diabetes and hyperlipidemia (**Supplemental Table 3**). The method of migraine assessment was either through  
40 questionnaires or hospital records (physician diagnosis) (**Supplemental Table 4**). The baseline characteristics  
41 of included subjects are shown in **Supplemental Table 5**. Four studies were exclusively females, [6,8,12,21]  
42 one study included males only, [7] while the remaining studies enrolled both sexes. Information on aura status  
43 was available in 7 studies. [5,21,27,33,35,36,41]  
44  
45  
46  
47  
48  
49  
50  
51  
52  
53  
54  
55  
56  
57  
58  
59  
60

### Major adverse cardiac and cerebrovascular events (MACCE)

MACCE was reported by four studies. [6,7,12,21] Three studies were considered high quality by Newcastle-Ottawa scale (**Supplemental Table 2**). The definition of MACCE by each study is reported in **Supplemental Table 6**. There was no evidence of publication bias by both Egger's test ( $P=0.87$ ) and funnel plot visualization (**Supplemental Figure 1**). The level of evidence appeared to be high by GRADE assessment tool (**Supplemental Table 7**). At a mean follow-up duration of 18.5 years (range 10 to 20 years), the risk of MACCE was higher in migraineurs (unadjusted RR 1.09, 95% CI 0.98-1.22,  $P=0.12$ ,  $I^2=0\%$ ; adjusted HR 1.42, 95% CI 1.26-1.60,  $P<0.001$ ,  $I^2=40\%$ ) with low to moderate degree of statistical heterogeneity between studies (**Supplemental Figure 2**). The sensitivity analysis limited to high quality studies showed similar results (adjusted HR 1.39, 95% CI 1.24-1.57,  $P<0.001$ ,  $I^2=43\%$ ). Subgroup analysis by the presence of aura could not be performed due to the small number of studies. Meta-regression analyses showed that the length of follow-up duration, and the midpoint of the enrollment year were not a significant source of statistical heterogeneity ( $P=0.79$ , 0.49) (**Supplemental Figure 3**).

### Stroke:

Thirteen studies reported the outcome of stroke. [6,7,11,12,21,22,32-39,41] One study reported haemorrhagic stroke only [35], 2 reported ischemic stroke only [11,36], 4 studies reported both ischemic and haemorrhagic stroke [7,21,22,34,39,41], and 6 studies reported stroke without specification. [6,12,32,33,37,38] Eleven studies were considered high quality by the Newcastle-Ottawa scale (**Supplemental Table 2**). **Supplemental Table 8** summarises how each of the studies assessed the outcome of stroke. There was no evidence of publication bias by both Egger's test ( $P=0.66$ ) and funnel plot visualization (**Supplemental Figure 4**). The level of evidence was high by GRADE assessment tool (**Supplemental Table 7**). At a mean follow-up of 5.8 years (range 1 to 26 years), migraineurs had a higher risk of stroke (unadjusted RR 1.32, 95% CI 1.03-1.68,  $P=0.02$ ,  $I^2=93\%$ ; adjusted HR 1.42, 95% CI 1.25-1.61,  $P<0.001$ ,  $I^2=72\%$ ) (**Figure 2**). This was true for both ischemic stroke (adjusted HR 1.29, 95% CI 1.08-1.54,  $P=0.005$ ,  $I^2=67\%$ ) and haemorrhagic stroke (adjusted HR 1.43, 95% CI 1.03-1.99,  $P=0.03$ ,  $I^2=66\%$ ) (**Figure 2**). There was no evidence of publication bias by Egger's test ( $P=0.14$ ). The sensitivity analysis limited to high quality studies showed similar results (adjusted HR 1.39, 95% CI

1 1.21-1.60,  $P<0.001$ ,  $I^2=71\%$ ). There was evidence of considerable statistical heterogeneity between the  
2 included studies, which was less evident after performing a subgrouping analysis according to the aura status.  
3  
4 The risk of stroke was evident only in the migraineurs with aura (adjusted HR 1.56, 95% CI 1.30-1.87,  
5  
6  $P<0.001$ ,  $I^2=39\%$ ), but not in those without aura (adjusted HR 1.11, 95% CI 0.94-1.31,  $P=0.21$ ,  $I^2=27\%$ ),  $P$   
7  
8  $_{interaction}=0.01$ , with no evidence of statistical heterogeneity between the studies (**Figure 3**). Subgroup analysis  
9  
10 according to sex showed no difference based on sex (**Figure 4**). Meta-regression analyses showed that the  
11  
12 length of follow-up duration, and the midpoint of the enrollment year were not a significant source of statistical  
13  
14 heterogeneity ( $P=0.38$ , and  $0.85$ , respectively) (**Supplemental Figure 5**).

### 20 *Myocardial infarction (MI):*

21  
22  
23 Seven studies reported MI events. [6,7,12,21,34,37,40] Five studies were high quality by Newcastle-Ottawa  
24  
25 scale (**Supplemental Table 2**). MI definitions for each study are summarised in **Supplemental Table 9**. There  
26  
27 was no evidence of publication bias by both Egger's test and funnel plot (**Supplemental Figure 6**). The quality  
28  
29 of evidence was high by GRADE assessment tool (**Supplemental Table 7**). At a mean follow-up of 8.8 years  
30  
31 (range 1 to 20 years), migraine was associated with a higher risk of MI (unadjusted RR 1.37, 95% CI 1.10-  
32  
33 1.71,  $P=0.001$ ,  $I^2=54\%$ ; adjusted HR 1.23, 95% CI 1.03-1.43,  $P=0.006$ ,  $I^2=59\%$ ) with a substantial evidence of  
34  
35 statistical heterogeneity between studies (**Supplemental Figure 7**). The sensitivity analysis limited to high  
36  
37 quality studies showed improved statistical heterogeneity (adjusted HR 1.32, 95% CI 1.19-1.47,  $P<0.001$ ,  
38  
39  $I^2=7\%$ ). Subgroup analyses by aura could not be performed due to the limited number of studies reporting MI  
40  
41 outcome by aura (only one study). Subgroup analysis according to sex did not illustrate any differences  
42  
43 according to sex (**Figure 4**). The statistical heterogeneity of MI risk was improved by meta-regression by  
44  
45 follow-up duration, with evidence of higher risk of MI as the duration of follow-up was increased (coefficient  
46  
47 0.17, 95% CI 0.003-0.31,  $P=0.02$ ) and no residual statistical heterogeneity after model adjustment ( $I^2=0\%$ )  
48  
49 (**Supplemental Figure 8**). However, there was no significant correlation between the risk of MI and the  
50  
51 midpoint of the enrollment year ( $P= 0.42$ ).



### *All-cause mortality:*

Six studies reported all-cause mortality. [5,6,8,33,34,37] Four studies were considered high quality by Newcastle-Ottawa scale (**Supplemental Table 2**). There was no evidence of publication bias by both Egger's test ( $P=0.81$ ) and funnel plot (**Supplemental Figure 9**). The quality of evidence was high by GRADE assessment tool (**Supplemental Table 7**). At a mean of 4.9 years (range 1 to 26 years), the overall risk of all-cause mortality was similar between subjects with or without migraine (unadjusted RR 0.74, 95% CI 0.49-1.10,  $P=0.14$ ,  $I^2=99\%$ ; and adjusted HR 0.93, 95% CI 0.78-1.10,  $P=0.38$ ,  $I^2=91\%$ ), with considerable degree of statistical heterogeneity between studies (**Supplemental Figure 10**). The sensitivity analysis limited to high quality studies showed similar results (adjusted HR 0.94 95% CI 0.74-1.19,  $P=0.60$   $I^2=93\%$ ). The statistical heterogeneity decreased significantly on subgroup analysis by the presence of aura (adjusted HR 1.20, 95% CI 1.12-1.30,  $P<0.001$ ,  $I^2=0\%$ ) or absence of aura (adjusted HR 0.96, 95% CI 0.86-1.07,  $P=0.436$ ,  $I^2=53$ ),  $P_{\text{interaction}}<0.001$  (**Figure 3**). Subgroup analysis according to sex did not show any difference (**Figure 4**). Meta-regression demonstrated that the follow-up duration was a significant source of statistical heterogeneity, and there was evidence of higher risk of all-cause mortality as the duration of follow-up increased (coefficient 0.14, 95% CI 0.001-0.27,  $P=0.04$ ), with low to moderate residual statistical heterogeneity after adjustment ( $I^2=45\%$ ) (**Supplemental Figure 11**). However, there was no significant correlation between the risk of all-cause mortality and the midpoint of the enrollment year ( $P= 0.93$ ).

## DISCUSSION

In this meta-analysis of 16 observational cohort studies with over 1,150,000 subjects and an extended follow-up duration up to 26 years, we demonstrated that migraine is associated with a higher risk of MACCE, mainly driven by a higher risk of stroke and MI. Although the risk of all-cause mortality was not significantly higher in migraineurs, this outcome was characterized by a high degree of statistical heterogeneity. These associations were demonstrated on both the unadjusted analysis as well as the adjusted analysis (this was seen for all of the outcomes assessed except for MACCE, where the association was significant only in the adjusted



analysis). This was performed in an attempt to minimize the effect of confounding, given the observational nature of the included studies. Compared to those without aura, migraineurs with aura appeared to have worse cardiovascular and cerebrovascular outcomes including stroke (both ischemic and haemorrhagic) and MI. There was no noted difference related to sex. The risk of all-cause mortality and MI were time dependent with a higher risk of both outcomes on long-term follow-up. The degree of statistical heterogeneity was less evident for all outcomes, when the migraineurs were stratified by the presence of aura. There was also evidence of effect modification for stroke and all-cause mortality by the presence of aura. Hence, the presence of aura identified a subgroup of migraineurs, who were at risk for future cardiovascular and cerebrovascular events.

Interestingly, the variation of follow-up duration among the included studies had a noticeable impact on the outcomes of MI and all-cause mortality, with evidence of higher risk as the duration of follow-up increases. The meta-regression by follow-up duration explained all of MI and 80% of all-cause mortality effect size variability between the included studies, with low to moderate residual statistical heterogeneity after model adjustment. This suggests a possible time dependent nature for these outcomes, with higher risk of developing an outcome as the duration of follow-up increases. These findings are also in agreement with prior studies that followed migraineurs for a longer duration and found a significant association of migraine (especially those with aura) with higher risk of MI and cardiovascular mortality [42,43]. The difference in the duration of follow up could explain why this association was not demonstrated for the outcome of stroke. In our study, the mean follow up for MI was 8.8 years, as opposed to 5.8 years for stroke. This effect was also noted in some studies such as the Women's Ischaemia Syndrome Evaluation study, where there was no association between migraine and cardiovascular events, including stroke, at a median of 4.4 years [23], but there was an increased risk of cardiovascular events, driven by a higher risk of stroke, at a median of 6.5 years [6].

Although the underlying etiology for the association between migraine and cardiovascular and cerebrovascular events such as stroke and MI remains unclear, several factors might help explain such association. Migraineurs were found to have higher levels of platelet aggregation, von Willebrand factor, and higher prevalence of hypercoagulable states. [4,44,45] Neurophysiological studies have linked migraine aura to cortical spreading depression, which is known to predispose the brain to cerebral hypoperfusion and arterial ischemia. [46] Thus, migraine as a disorder seems to be a systemic vascular disorder, as evident by arterial

1 stiffness and endothelial dysfunction in peripheral vasculature in migraineurs. [47] Although some authors had  
2 suggested that the higher risk of cardiovascular and cerebrovascular events in these subjects might be  
3 attributed to the higher prevalence of other cardiovascular risk factors such as smoking, hyperlipidemia and  
4 hypertension among migraineurs. Our adjusted analyses corrected for most of the conventional cardiovascular  
5 risk factors and demonstrated an association between migraine and stroke and MI.  
6  
7  
8  
9

10  
11 A number of studies have reported patent foramen ovale (PFO) mediated right-to-left shunting as a  
12 culprit for migraine with aura and cryptogenic stroke [48]. While PFO occurs in 20-25% of the adult population,  
13 up to 50% of patients who have migraine with aura or cryptogenic stroke have been found to have a PFO.  
14 [49,50] Randomized clinical trials have demonstrated that percutaneous PFO closure reduces the risk of  
15 recurrent stroke compared with medical therapy, in patients with cryptogenic ischemic stroke. [51] However,  
16 PFO closure for migraineurs remains controversial, but randomized data suggest that a subset of migraineurs  
17 who have frequent aura experience a decrease in the frequency and duration of their migraine attacks with  
18 device closure. [52,53]  
19  
20  
21  
22  
23  
24  
25  
26  
27  
28

29 The findings from this meta-analysis demonstrated that migraine, particularly with aura, is a risk factor  
30 for future cardiovascular and cerebrovascular events, namely stroke and MI. In the updated United Kingdom  
31 QRISK3 risk prediction algorithms to estimate future risk of cardiovascular disease, a history of migraine with  
32 or without an aura has been recently included as an additional clinical variable. [54] However this updated risk  
33 prediction score does not take into account other migraine features such as frequency of attacks, which have  
34 been linked to stroke occurrence, but not for other cardiovascular outcomes. [55] The efficacy of adequate  
35 migraine control with triptans and the use of antiplatelet agents or statins for primary prevention are all areas of  
36 research which might provide insight on the best therapy for prevention of cardiovascular and cerebrovascular  
37 events among migraineurs. [56]  
38  
39  
40  
41  
42  
43  
44  
45  
46  
47  
48

49 To the best of our knowledge, the current meta-analysis represents the largest and most updated meta-  
50 analysis of cohort studies evaluating the association between migraine and cardiovascular and  
51 cerebrovascular outcomes. The strengths of this study include: the large sample size, the use of adjusted  
52 summary estimates which attempted to minimize the risk of confounding, and the wide variety of analyses  
53 which were conducted to assess for the reasons of statistical heterogeneity among the included studies. Unlike  
54  
55  
56  
57  
58  
59

1 other meta-analyses which focused on one outcome such as mortality [10], MI and angina [43], ischemic  
2 stroke [57], haemorrhagic stroke [58], or any stroke [59], this meta-analysis evaluated a wide range of  
3 cardiovascular and cerebrovascular outcomes. In addition, we included only cohort studies, which are  
4 considered of higher evidence as compared to case-control studies. By using the totality of evidence to date,  
5 this meta-analysis provided more refined estimates for the outcome of stroke and demonstrated a significant  
6 association between migraine and the risk of MI as compared with the prior meta-analysis by Schürks et al  
7 [10]. Although a recent meta-analysis of cohort studies which included 2,221,888 participants demonstrated  
8 that migraine was associated with a higher risk of stroke, particularly ischemic stroke, but there was no  
9 difference in the risk of haemorrhagic stroke [59], unlike our meta-analysis. The difference in the inclusion  
10 criteria could explain these differences. In our meta-analysis, we excluded the study by Gelfand et al [28],  
11 since this study enrolled only pediatric subjects (i.e., ~1.6 million subjects).  
12  
13  
14  
15  
16  
17  
18  
19  
20  
21  
22  
23

24 This study has a few limitations which are worth mentioning. Despite multiple subgroup and sensitivity  
25 analyses, there was still a considerable degree of statistical heterogeneity for most outcomes. This could be  
26 attributed to several factors: migraine is a heterogeneous disease itself with many subtypes and variability in  
27 symptoms and classifying migraine into aura and no aura is a crude classification. Second, methods of  
28 ascertainment of the migraine diagnosis varied among the studies between questionnaire, self-reporting,  
29 physician diagnosis, and retrospective collection on national health data. Third, methods of ascertainment for  
30 the outcomes varied significantly between phone calls, interviews, or physician office visits. Fourth, although  
31 we performed several subgroup and meta-regression analyses to further explore the statistical heterogeneity,  
32 some considerations of clinical and methodological heterogeneity are worth mentioning. For example, the  
33 studies included several races and ethnicities, with some only including Asians and others done in Europe or  
34 the United States. Due to the lack of patient level data, further stratification for race and ethnicity could not be  
35 performed. In addition, some of the included studies used HRs and others used RR; this approach of using RR  
36 and HR interchangeably has been adopted in prior meta-analyses on this topic [43], however, this approach  
37 could have resulted in methodological heterogeneity. Fifth, the included studies were non-randomized;  
38 however, most of the studies were considered high quality and had reported adjusted outcomes. Sixth, data  
39 regarding the frequency of attacks was not collected in most of the studies, so an analysis based on the  
40 frequency of migraine attacks could not be performed. Seventh, we could not comment on the potential impact  
41  
42  
43  
44  
45  
46  
47  
48  
49  
50  
51  
52  
53  
54  
55  
56  
57  
58  
59

1 of some therapies such as non-steroidal anti-inflammatory drugs as this information was not reported by the  
2 studies. Eighth, the power of the funnel plot to detect publication bias is limited in the scenarios where there  
3 are few studies included in the analysis. Ninth, we did not assess the association between migraine and other  
4 vascular disorders such as peripheral arterial disease and venous thrombosis, which has been suggested in  
5 some studies [47]. Finally, we could not exclude the possibility that some subjects in the control arm may have  
6 had non-migraine headache, this comparison might contribute to the increased clinical heterogeneity between  
7 the studies.  
8  
9  
10  
11  
12  
13  
14  
15  
16  
17

## 18 **Conclusions:**

19  
20  
21 Migraine headaches is associated with an increased risk of long-term cardiovascular and cerebrovascular  
22 events. This association was driven mainly by a higher risk of stroke (both ischaemic and haemorrhagic) and  
23 MI. The presence of aura is associated with an increased risk of events compared with those without aura.  
24  
25  
26  
27  
28 Future studies should be directed towards reducing the risk of cardiovascular and cerebrovascular events  
29 among migraineurs, particularly those with aura.  
30  
31  
32  
33  
34  
35

## 36 **Funding Sources**

37  
38  
39 This research received no specific grant from any funding agency in the public, commercial or not-for-profit  
40 sectors.  
41  
42  
43  
44  
45  
46

## 47 **Conflict of Interest**

48  
49 All authors have nothing to disclose.  
50  
51  
52  
53  
54  
55

## 56 **Contributorship Statement**

1 ANM: data analysis, data interpretation, drafting manuscript, final critical revision of the manuscript and final  
2 approval. AM: data collection, data interpretation, drafting manuscript, final critical revision of the manuscript  
3 and final approval. AE: contributed to data extraction. AQ: contributed to data extraction. AB: contributed to  
4 data extraction and final critical revision of the manuscript. MS: final critical revision of the manuscript. Ala  
5 Mohsen: contributed to data extraction. AA: contributed to data extraction and final critical revision of the  
6 manuscript. HM: final critical revision of the manuscript; MKM: final critical revision of the manuscript; IE: data  
7 analysis, data interpretation, drafting manuscript, final critical revision of the manuscript and final approval.  
8  
9  
10  
11  
12  
13  
14  
15  
16  
17

### 18 **Data Sharing Statement**

19 No additional data are available.  
20  
21  
22  
23  
24  
25  
26

27 **Acknowledgements:** None  
28  
29  
30  
31  
32  
33  
34  
35  
36  
37  
38  
39  
40  
41  
42  
43  
44  
45  
46  
47  
48  
49  
50  
51  
52  
53  
54  
55  
56  
57  
58  
59  
60

**References:**

1. Lipton RB, Bigal ME, Diamond M, et al. Migraine prevalence, disease burden, and the need for preventive therapy. *Neurology* 2007;68:343–9.
2. Woods RP, Iacoboni M, Mazziotta JC. Brief report: bilateral spreading cerebral hypoperfusion during spontaneous migraine headache. *N Engl J Med* 1994;331:1689–92.
3. Tietjen GE. Migraine as a systemic vasculopathy. *Cephalalgia* 2009;29:987–96.
4. Martínez-Sánchez P, Martínez-Martínez M, Fuentes B, et al. Migraine and hypercoagulable states in ischemic stroke. *Cephalalgia* 2011;31:1609–17.
5. Åsberg AN, Stovner LJ, Zwart J-A, et al. Migraine as a predictor of mortality: The HUNT study. *Cephalalgia* 2016;36:351–7.
6. Rambarat CA, Elgendy IY, Johnson BD, et al. Migraine Headache and Long Term Cardiovascular Outcomes: An extended follow-up of the Women's Ischemia Syndrome Evaluation. *Am J Med* 2017;130:738-743.
7. Kurth T, Gaziano JM, Cook NR, et al. Migraine and risk of cardiovascular disease in men. *Arch Intern Med* 2007;167:795–801.
8. Waters WE, Campbell MJ, Elwood PC. Migraine, headache, and survival in women. *Br Med J* 1983;287:1442–3.
9. Schürks M, Rist PM, Shapiro RE, et al. Migraine and mortality: a systematic review and meta-analysis. *Cephalalgia* 2011;31:1301–14.
10. Schürks M, Rist PM, Bigal ME, et al. Migraine and cardiovascular disease: systematic review and meta-analysis. *BMJ* 2009;339:b3914.
11. Androulakis XM, Kodumuri N, Giamberardino LD, et al. Ischemic stroke subtypes and migraine with visual aura in the ARIC study. *Neurology* 2016;87:2527–32.

- 1 12. Kurth T, Winter AC, Eliassen AH, et al. Migraine and risk of cardiovascular disease in women: prospective  
2 cohort study. *BMJ* 2016;353:i2610.  
3
- 4
- 5 13. Stroup DF, Berlin JA, Morton SC, et al. Meta-analysis of observational studies in epidemiology: a proposal  
6 for reporting. Meta-analysis Of Observational Studies in Epidemiology (MOOSE) group. *JAMA* 2000;283:2008–  
7  
8 12.  
9
- 10
- 11
- 12 14. Moher D, Liberati A, Tetzlaff J, et al. Preferred reporting items for systematic reviews and meta-analyses:  
13 the PRISMA statement. *BMJ* 2009;339:b2535.  
14
- 15
- 16
- 17 15. Kopec JA, Esdaile JM. Bias in case-control studies. A review. *J Epidemiol Community Health*  
18  
19 1990;44:179–86.  
20
- 21
- 22 16. Lauer MS, Blackstone EH, Young JB, et al. Cause of death in clinical research: Time for a reassessment?  
23  
24 *J Am Coll Cardiol* 1999;34:618–20.  
25
- 26
- 27 17. Higgins JP, Green S. Cochrane Handbook for Systematic Reviews of. Cochrane Collab. 2008. Available  
28 from: <http://onlinelibrary.wiley.com/doi/10.1002/9780470712184.fmatter/summary>  
29
- 30
- 31
- 32 18. DerSimonian R, Laird N. Meta-analysis in clinical trials. *Control Clin Trials* 1986;7:177–88.  
33
- 34
- 35 19. Grant RL. Converting an odds ratio to a range of plausible relative risks for better communication of  
36 research findings. *BMJ* 2014;348:f7450.  
37
- 38
- 39
- 40 20. Egger M, Davey Smith G, Schneider M, et al. Bias in meta-analysis detected by a simple, graphical test.  
41  
42 *BMJ* 1997;315:629–34.  
43
- 44
- 45 21. Kurth T, Gaziano JM, Cook NR, et al. Migraine and risk of cardiovascular disease in women. *JAMA*  
46  
47 2006;296:283–91.  
48
- 49
- 50 22. Kurth T, Kase CS, Schürks M, et al. Migraine and risk of haemorrhagic stroke in women: prospective  
51 cohort study. *BMJ* 2010;341:c3659.  
52
- 53
- 54
- 55 23. Ahmed B, Bairey Merz CN, McClure C, et al. Migraines, angiographic coronary artery disease and  
56 cardiovascular outcomes in women. *Am J Med* 2006;119:670–5.  
57
- 58
- 59
- 60

24. Cook NR, Benseñor IM, Lotufo PA, et al. Migraine and coronary heart disease in women and men. *Headache* 2002;42:715–27.
25. Kurth T, Slomke MA, Kase CS, et al. Migraine, headache, and the risk of stroke in women: a prospective study. *Neurology* 2005;64:1020–6.
26. Becker C, Brobert GP, Almqvist PM, et al. Migraine and the risk of stroke, TIA, or death in the UK. *Headache* 2007;47:1374–84.
27. Stang PE, Carson AP, Rose KM, et al. Headache, cerebrovascular symptoms, and stroke: The atherosclerosis risk in communities study. *Neurology* 2005;64:1573–7.
28. Gelfand AA, Fullerton HJ, Jacobson A, et al. Is migraine a risk factor for pediatric stroke? *Cephalalgia* 2015;35:1252–60.
29. Norton J, Portet F, Gabelle A, et al. Are migraine and non-migrainous headache risk factors for stroke in the elderly? Findings from a 12-year cohort follow-up. *Eur J Neurol* 2016;23:1463–70.
30. Monteith TS, Gardener H, Rundek T, et al. Migraine and risk of stroke in older adults: Northern Manhattan Study. *Neurology* 2015;85:715–21.
31. Liew G, Wang JJ, Mitchell P. Migraine and coronary heart disease mortality: a prospective cohort study. *Cephalalgia* 2007;27:368–71.
32. Wang Y-C, Lin C-W, Ho Y-T, et al. Increased risk of ischemic heart disease in young patients with migraine: a population-based, propensity score-matched, longitudinal follow-up study. *Int J Cardiol* 2014;172:213–6.
33. Gudmundsson LS, Scher AI, Aspelund T, et al. Migraine with aura and risk of cardiovascular and all cause mortality in men and women: prospective cohort study. *BMJ* 2010;341:c3966.
34. Hall GC, Brown MM, Mo J, et al. Triptans in migraine: the risks of stroke, cardiovascular disease, and death in practice. *Neurology* 2004;62:563–8.
35. Kuo C-Y, Yen M-F, Chen L-S, et al. Increased risk of hemorrhagic stroke in patients with migraine: a



1 population-based cohort study. *PLoS One* 2013;8:e55253.

2  
3 36. Peng K-P, Chen Y-T, Fuh J-L, et al. Migraine and incidence of ischemic stroke: A nationwide population-  
4 based study. *Cephalalgia* 2017;37:327-335..

5  
6  
7  
8 37. Velentgas P, Cole JA, Mo J, et al. Severe vascular events in migraine patients. *Headache* 2004;44:642–51.

9  
10  
11 38. Merikangas KR, Fenton BT, Cheng SH, et al. Association between migraine and stroke in a large-scale  
12 epidemiological study of the United States. *Arch Neurol* 1997;54:362–8.

13  
14  
15  
16 39. Buring JE, Hebert P, Romero J, et al. Migraine and subsequent risk of stroke in the Physicians' Health  
17 Study. *Arch Neurol* 1995;52:129–34.

18  
19  
20  
21 40. Sternfeld B, Stang P, Sidney S. Relationship of migraine headaches to experience of chest pain and  
22 subsequent risk for myocardial infarction. *Neurology* 1995;45:2135–42.

23  
24  
25  
26 41. Lantz M, Sieurin J, Sjölander A, et al. Migraine and risk of stroke: a national population-based twin study.  
27  
28 *Brain* 2017;140:2653-2662.

29  
30  
31 42. Rossi E, Benemei S, Messori A. Association between migraine and cardiovascular mortality: Is there a  
32 temporal trend? *Cephalalgia* 2013;33:1059-60.

33  
34  
35  
36 43. Sacco S, Ornello R, Ripa P, et al. Migraine and risk of ischaemic heart disease: a systematic review and  
37 meta-analysis of observational studies. *Eur J Neurol* 2015;22:1001-11.

38  
39  
40  
41 44. D'Andrea G, Hasselmark L, Alecci M, et al. Platelet secretion from dense and alpha-granules in vitro in  
42 migraine with or without aura. *J Neurol Neurosurg Psychiatry*. 1994;57:557–61.

43  
44  
45  
46 45. Tietjen GE, Al-Qasbi MM, Athanas K, et al. Increased von Willebrand factor in migraine. *Neurology*  
47  
48 2001;57:334–6.

49  
50  
51 46. Pietrobon D, Moskowitz MA. Pathophysiology of migraine. *Annu Rev Physiol*. 2013;75:365–91.

52  
53  
54 47. Sacco S, Ripa P, Grassi D, et al. Peripheral vascular dysfunction in migraine: a review. *J Headache Pain*  
55  
56 2013;14:80.

- 1  
2  
3  
4  
5  
6  
7  
8  
9  
10  
11  
12  
13  
14  
15  
16  
17  
18  
19  
20  
21  
22  
23  
24  
25  
26  
27  
28  
29  
30  
31  
32  
33  
34  
35  
36  
37  
38  
39  
40  
41  
42  
43  
44  
45  
46  
47  
48  
49  
50  
51  
52  
53  
54  
55  
56  
57  
58  
59  
60
48. Khessali H, Mojadidi MK, Gevorgyan R, et al. The effect of patent foramen ovale closure on visual aura without headache or typical aura with migraine headache. *JACC Cardiovasc Interv* 2012;5:682-7.
49. Schwedt TJ, Demaerschalk BM, Dodick DW. Patent foramen ovale and migraine: a quantitative systematic review. *Cephalalgia* 2008;28:531-40.
50. Mojadidi MK, Christia P, Salamon J, et al. Patent foramen ovale: Unanswered questions. *Eur J Intern Med* 2015;26:743-51.
51. Mojadidi MK, Elgendy AY, Elgendy IY, et al. Transcatheter patent foramen ovale closure after cryptogenic stroke: An updated meta-analysis of randomized trials. *JACC Cardiovasc Interv* 2017;10:2228-30.
52. Tobis JM, Charles A, Silberstein SD, et al. Percutaneous closure of patent foramen ovale in patients with migraine: The PREMIUM Trial. *J Am Coll Cardiol* 2017;70:2766-74.
53. Mattle HP, Evers S, Hildick-Smith D, et al. Percutaneous closure of patent foramen ovale in migraine with aura, a randomized controlled trial. *Eur Heart J* 2016;37:2029-36.
54. Hippisley-Cox J, Coupland C, Brindle P. Development and validation of QRISK3 risk prediction algorithms to estimate future risk of cardiovascular disease: prospective cohort study. *BMJ* 2017;357:j2099.
55. Kurth T, Schürks M, Logroscino G, et al. Migraine frequency and risk of cardiovascular disease in women. *Neurology* 2009;73:581-8.
56. Liberopoulos EN, Mikhailidis DP. Could statins be useful in the treatment of patients with migraine? *Headache* 2006;46:672-5.
57. Spector JT, Kahn SR, Jones MR, et al. Migraine headache and ischemic stroke risk: an updated meta-analysis. *Am J Med* 2010;123:612-24.
58. Sacco S, Ornello R, Ripa P, et al. Migraine and hemorrhagic stroke: a meta-analysis. *Stroke* 2013;44:3032-8.
59. Hu X, Zhou Y, Zhao H, et al. Migraine and the risk of stroke: an updated meta-analysis of prospective cohort studies. *Neurol Sci* 2017;38:33-40.

**Figure legends:**

**Figure 1:** Summary of how the systematic search was conducted and eligible studies were identified (PRISMA flow diagram).

**Figure 2:** Random effects summary adjusted hazard ratio of stroke according to the stroke type.

HR= Hazard ratio, CI= Confidence interval.

The P-value is for Chi-square test of heterogeneity.

N.B: Haemorrhagic and ischemic stroke outcomes were reported in separate publications for Physician Health Study and Women Health Study.

**Figure 3:** Random effects summary adjusted hazard ratio of stroke and all-cause mortality according to the aura status.

HR= Hazard ratio, CI= Confidence interval.

The P-value is for Chi-square test of heterogeneity.

**Figure 4:** Random effects summary adjusted hazard ratio of stroke, myocardial infarction and all-cause mortality according to sex.

ACM= all-cause mortality, HR= Hazard ratio, CI= Confidence interval, MI= myocardial infarction

Table: Baseline characteristics of studies included in the analysis

1

| 2  | Study (Ref.)              | Year | Country | Design        | Registry                                            | Total         | Enrollment              | Follow-up | Outcomes reported                            |
|----|---------------------------|------|---------|---------------|-----------------------------------------------------|---------------|-------------------------|-----------|----------------------------------------------|
| 3  |                           |      |         |               |                                                     | subjects*     | period                  | (years)   |                                              |
| 4  | Waters et al [8]          | 1983 | Wales   | Prospective   | Rhonda Valley                                       | 605/705       | 1967                    | 12        | All-cause mortality                          |
| 5  | Sternfeld et al [40] **   | 1995 | USA     | Retrospective | Northern California Kaiser<br>Permanente            | 4319/74962*   | 1971-1973               | 15        | MI                                           |
| 7  | Merikangas et al [38]     | 1997 | USA     | Prospective   | National Health and Nutrition<br>Examination Survey | 1109/10982    | 1971-1975               | 10        | Stroke                                       |
| 9  | Hall et al [34]           | 2004 | UK      | Retrospective | General practice research<br>database               | 63575/77239   | 1992-1999               | 3         | All-cause mortality, stroke,<br>and MI       |
| 11 | Velentgas et al [37]      | 2004 | USA     | Retrospective | United Health care                                  | 130411/130411 | 1995-1999               | 1         | All-cause mortality, stroke,<br>and MI       |
| 13 | Kurth et al (WHS) [21,22] | 2006 | USA     | Prospective   | Women's Health Study                                | 5125/22715    | 1992-1995               | 10        | MACCE, stroke and MI                         |
| 14 | Kurth et al (PHS) [7,39]  | 2007 | USA     | Prospective   | Physician's Health Study                            | 1449/18635    | 1981-1984               | 16        | MACCE, stroke and MI                         |
| 15 | Gudmundsson et al [33]    | 2010 | Iceland | Prospective   | Reykjavik study                                     | 2023/1371     | 1967-1991               | 26        | All-cause mortality and<br>stroke            |
| 17 | Kuo et al [35]            | 2013 | Taiwan  | Retrospective | Taiwan National Health insurance                    | 20925/104625  | 2001                    | 2         | Stroke                                       |
| 18 | Wang et al [32]           | 2014 | Taiwan  | Retrospective | Taiwan National Health insurance                    | 11541/11541   | 2001                    | 2.5       | Stroke and MI                                |
| 19 | Åsberg et al [5]          | 2016 | Norway  | Prospective   | HUNT2 study                                         | 6831/31737    | 1995-1997               | 14.1      | All-cause mortality                          |
| 20 | Peng et al [36]           | 2016 | Taiwan  | Prospective   | Taiwan National Health insurance                    | 119017/119107 | 2005-2009               | 3.6       | Stroke                                       |
| 21 | Kurth et al (NHS) [12]    | 2016 | USA     | Retrospective | Nurses' Health Study                                | 17531/98010   | 1989                    | 20        | MACCE, stroke and MI                         |
| 22 | Androulakis et al [11]    | 2016 | USA     | Prospective   | Atherosclerosis Risk in<br>Communities study        | 1622/10053    | 1987-1989               | 20        | Stroke                                       |
| 24 | Rambarat et al [6]        | 2017 | USA     | Prospective   | Women's Ischemia Syndrome<br>Evaluation             | 224/693       | 1996-1999               | 6.5       | MACCE, Stroke, all-cause<br>mortality and MI |
| 26 | Lantz et al [41]          | 2017 | Sweden  | Retrospective | Swedish population-based twin<br>cohort             | 8635/44769    | 1998-2002,<br>2005-2006 | 11.9      | Stroke                                       |

28

29 \*Total patients are reported as migraine/no migraine arms.

30 MI: Myocardial infarction.

31 WHS: Women's Health Study, PHS: Physician's Health Study, NHS: Nurses' Health Study

32 \*\*This study included two cohorts with different methods of assessment of migraine

33

34

35

36

37

38

39

40

41

42

43

44

45

46

47

48

49

50

51

52

53

54

55

56

57

58

59

60

1  
2  
3  
4  
5  
6  
7  
8  
9  
10  
11  
12  
13  
14  
15  
16  
17  
18  
19  
20  
21  
22  
23  
24  
25  
26  
27  
28  
29  
30  
31  
32  
33  
34  
35  
36  
37  
38  
39  
40  
41  
42  
43  
44  
45  
46  
47  
48  
49  
50  
51  
52  
53  
54  
55  
56  
57  
58  
59  
60

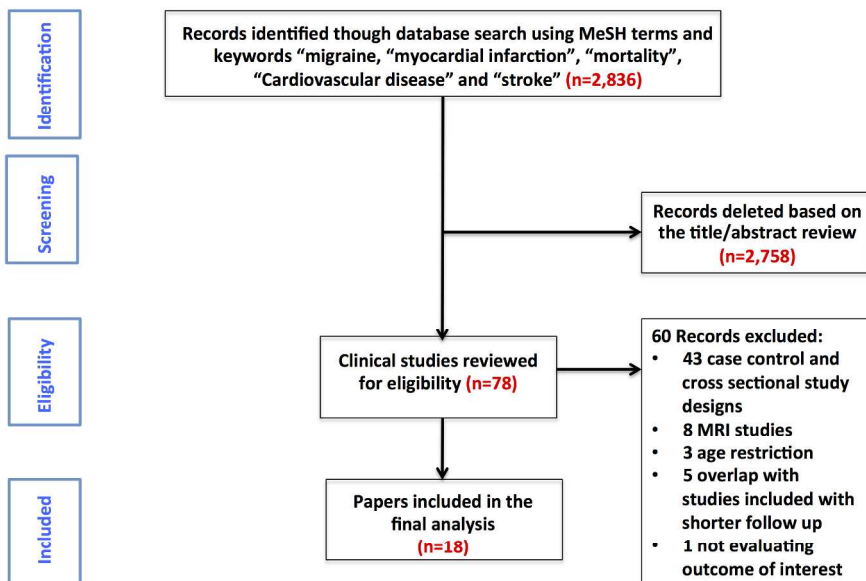

Figure 1: Summary of how the systematic search was conducted and eligible studies were identified (PRISMA flow diagram).

254x190mm (300 x 300 DPI)

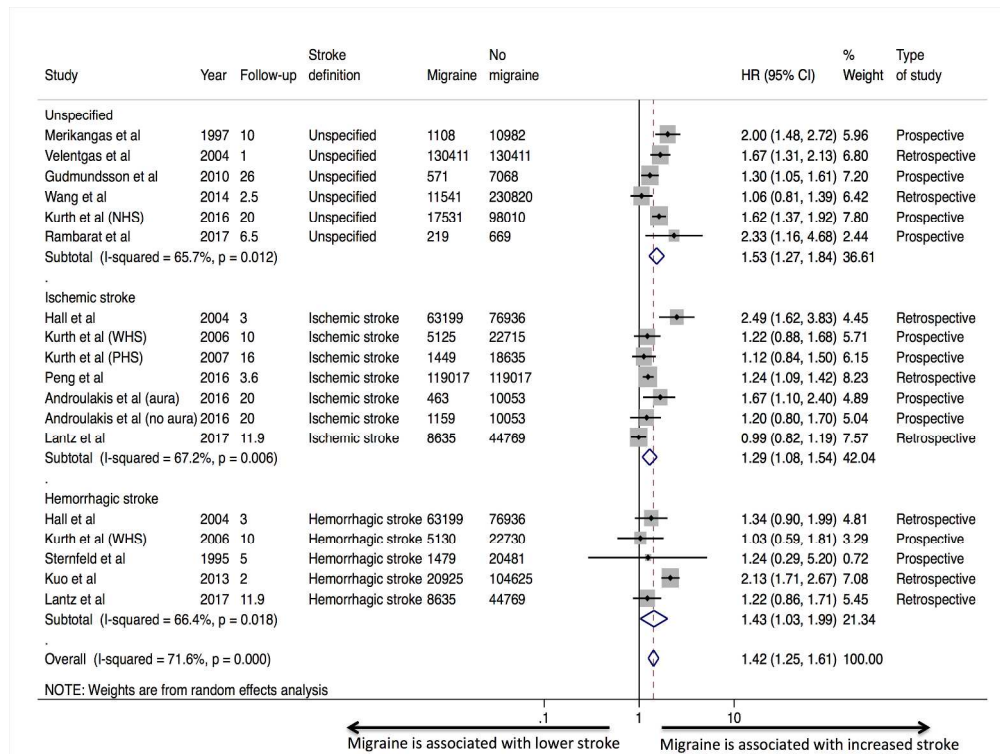

Figure 2: Random effects summary adjusted hazard ratio of stroke according to the stroke type.  
 HR= Hazard ratio, CI= Confidence interval.

The P-value is for Chi-square test of heterogeneity.

N.B: Haemorrhagic and ischemic stroke outcomes were reported in separate publications for Physician Health Study and Women Health Study.

254x190mm (300 x 300 DPI)

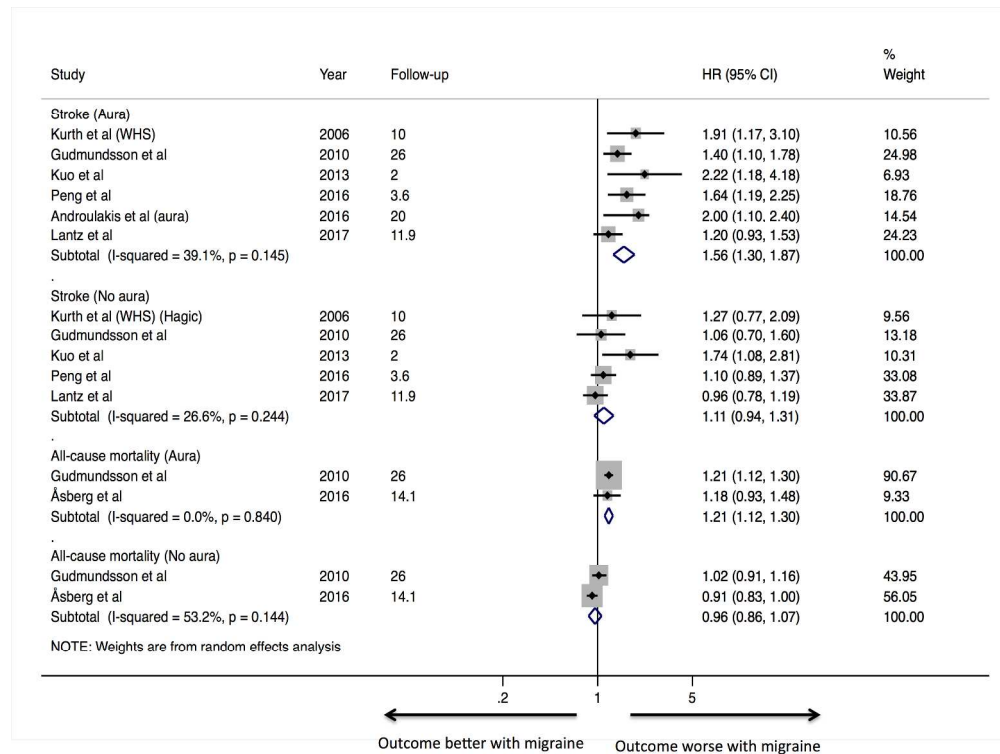

Figure 3: Random effects summary adjusted hazard ratio of stroke and all-cause mortality according to the aura status.

HR= Hazard ratio, CI= Confidence interval.  
The P-value is for Chi-square test of heterogeneity.

254x190mm (300 x 300 DPI)

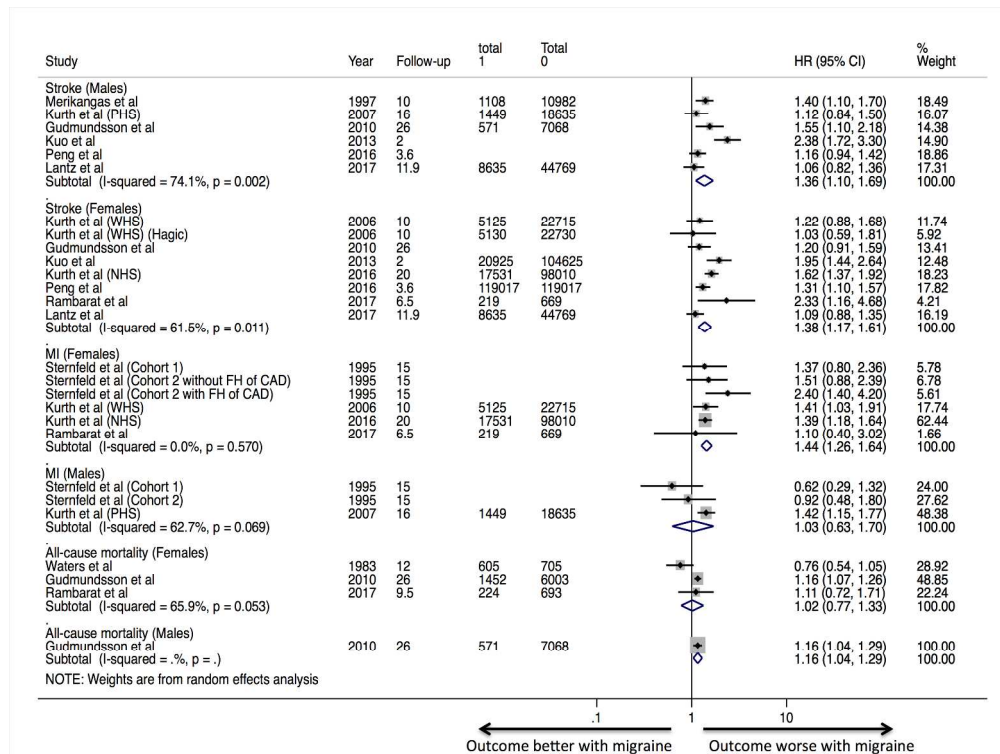

Figure 4: Random effects summary adjusted hazard ratio of stroke, myocardial infarction and all-cause mortality according to sex.

ACM= all-cause mortality, HR= Hazard ratio, CI= Confidence interval, MI= myocardial infarction

254x190mm (300 x 300 DPI)



1  
2  
3  
4  
5  
6  
7  
8  
9  
10  
11  
12  
13  
14  
15  
16  
17  
18  
19  
20  
21  
22  
23  
24  
25  
26  
27  
28  
29  
30  
31  
32  
33  
34  
35  
36  
37  
38  
39  
40  
41  
42  
43  
44  
45  
46  
47

**Supplemental Table 1: Search strategy**

|                                                    |                                                                                                                                                                                                                                                                                                                                                                                                                                                                                                                                                                                                                                                                                                |
|----------------------------------------------------|------------------------------------------------------------------------------------------------------------------------------------------------------------------------------------------------------------------------------------------------------------------------------------------------------------------------------------------------------------------------------------------------------------------------------------------------------------------------------------------------------------------------------------------------------------------------------------------------------------------------------------------------------------------------------------------------|
| For PubMed                                         | (((("migraine disorders"[MeSH Terms] OR ("migraine"[All Fields] AND "disorders"[All Fields]) OR "migraine disorders"[All Fields] OR "migraine"[All Fields]) AND ("mortality"[Subheading] OR "mortality"[All Fields] OR "mortality"[MeSH Terms])) OR ((("migraine disorders"[MeSH Terms] OR ("migraine"[All Fields] AND "disorders"[All Fields]) OR "migraine disorders"[All Fields] OR "migraine"[All Fields]) AND ("stroke"[MeSH Terms] OR "stroke"[All Fields]))) OR ((("migraine disorders"[MeSH Terms] OR ("migraine"[All Fields] AND "disorders"[All Fields]) OR "migraine disorders"[All Fields] OR "migraine"[All Fields]) AND ("infarction"[MeSH Terms] OR "infarction"[All Fields]))) |
| For Cochrane Central Register of Controlled Trials | #1: MeSH descriptor: [Migraine]<br>#2: MeSH descriptor: [Mortality]<br>#3: MeSH descriptor: [Stroke]<br>#4: MeSH descriptor: [Infarction]<br>#5: #1 and (#2 or #3 or #4)                                                                                                                                                                                                                                                                                                                                                                                                                                                                                                                       |

MeSH = Medical subject heading

1  
2  
3 **Supplemental material: quality assessment tool by the Newcastle-Ottawa scale**  
4

5 **Selection:**  
6

7 **1:** Are cases truly representative or somewhat representative of population? (Yes \*/No)  
8

9 **2:** Are cases drawn from the same population? (Yes \*/No)  
10

11 **3:** How was diagnosis of migraine ascertained? (Health records or physician diagnosis \*/self diagnosis)  
12

13 **4:** Did the study demonstrate that outcome of interest was not present at the beginning of the study? (Yes\*/No)  
14

15 **Comparability:**  
16

17 Did the study adjust for possible confounders in statistical analysis?  
18

19 **1:** Age and Gender\*  
20

21 **2:** other additional factors\*  
22

23 **Outcome**  
24

25 **1:** How was the outcome assessed? (Health records, physician diagnosis, imaging\*/self report or not reported)  
26

27 **2:** Was follow up duration long enough (>6 months)? (Yes\*/No)  
28

29 **3:** How was completeness of follow up? (>80%\*/<80%)  
30  
31  
32  
33  
34  
35  
36  
37  
38  
39  
40  
41  
42  
43  
44  
45  
46  
47

**Supplemental Table 2:** Quality of included studies by Newcastle-Ottawa scale.

| Study [Ref.]                 | Selection | Comparability | Outcome | Quality* |
|------------------------------|-----------|---------------|---------|----------|
| Waters et al [8]             | **        |               | ***     | Low      |
| Sternfeld et al [40]         | **        | **            | **      | Low      |
| Merikangas et al [38]        | **        | *             | ***     | Low      |
| Hall et al [34]              | ****      | *             | ***     | High     |
| Velentgas et al [37]         | ****      | **            | ***     | High     |
| Kurth et al (WHS)<br>[21,22] | ***       | **            | ***     | High     |
| Kurth et al (PHS) [7,39]     | ***       | **            | ***     | High     |
| Gudmundsson et al [33]       | ***       | **            | ***     | High     |
| Kuo et al [35]               | ****      | **            | ***     | High     |
| Wang et al [32]              | ****      | **            | **      | High     |
| Åsberg et al [5]             | **        | **            | ***     | High     |
| Peng et al [36]              | ****      | **            | ***     | High     |
| Kurth et al (NHS) [12]       | ****      | **            | ***     | High     |
| Androulakis et al [11]       | ***       | **            | **      | High     |
| Rambarat et al [6]           | *         | **            | ***     | Low      |
| Lantz et al [41]             | **        | **            | ***     | High     |

A study with 7 or more stars out of 9 was considered a high quality study

WHS: Women’s Health Study, PHS: Physician’s Health Study, NHS: Nurses’ Health Study

**Supplemental Table 3:** Variables adjusted for the hazard ratio reported in each study included

| Study [Ref.]              | Age | HTN | DM | BMI | Smoking | Alcohol | Exercise | Post-menopausal | OCP | HPL | FH of premature CAD | Aspirin |
|---------------------------|-----|-----|----|-----|---------|---------|----------|-----------------|-----|-----|---------------------|---------|
| Waters et al [8]          | X   |     |    |     | X       |         |          |                 |     |     |                     |         |
| Sternfeld et al [40]      | X   | X   | X  | X   |         |         |          |                 |     | X   |                     |         |
| Merikangas et al [38]     | X   | X   | X  |     |         |         |          |                 |     |     |                     |         |
| Hall et al [34]           | X   | X   | X  | X   | X       |         |          |                 | X   | X   |                     |         |
| Velentgas et al [37]      | X   | X   | X  | X   |         |         |          |                 | X   | X   |                     |         |
| Kurth et al (WHS) [21,22] | X   | X   | X  | X   | X       | X       | X        | X               | X   | X   | X                   | X       |
| Kurth et al (PHS) [7,39]  | X   | X   | X  | X   | X       | X       | X        |                 |     | X   | X                   |         |
| Gudmundsson et al [33]    | X   | X   | X  | X   | X       |         |          |                 | X   | X   |                     |         |
| Kuo et al [35]            | X   | X   | X  | X   |         |         |          |                 |     | X   |                     | X       |
| Wang et al [32]           | X   | X   | X  | X   |         |         |          |                 |     | X   |                     |         |
| Åsberg et al [5]          | X   | X   | X  | X   | X       | X       | X        |                 |     | X   |                     |         |
| Peng et al [36]           | X   | X   | X  | X   |         |         |          |                 |     | X   |                     |         |
| Kurth et al (NHS) [12]    | X   | X   | X  | X   | X       | X       | X        | X               | X   | X   | X                   | X       |
| Androulakis et al [11]    | X   | X   | X  | X   | X       | X       | X        |                 |     | X   |                     |         |
| Rambarat et al [6]        | X   | X   | X  | X   | X       |         |          |                 |     | X   | X                   | X       |
| Lantz et al [41]          | X   | X   | X  | X   | X       |         |          |                 |     | X   |                     |         |

\* Adjusted by propensity score matching for chronic renal disease, chronic liver disease, valvular heart disease, smoking, atrial fibrillation, myocardial infarction, and peripheral vascular disease.

HTN: Hypertension, DM: Diabetes mellitus, BMI: Body mass index, OCP: Oral contraceptive pills, HPL: hyperlipidemia, FH: family history, CAD: coronary artery disease, WHS: Women's Health Study, PHS: Physician's Health Study, NHS: Nurses' Health Study

**Supplemental Table 4:** Methods of assessment of migraine status in study participants

| <b>Study [Ref.]</b>       | <b>Method of assessment</b>                                                                          |
|---------------------------|------------------------------------------------------------------------------------------------------|
| Waters et al [8]          | Questionnaire: Self-reporting symptoms                                                               |
| Sternfeld et al [40]      | Cohort 1: Questionnaire self-reporting symptoms<br>Cohort 2: Questionnaire about physician diagnosis |
| Merikangas et al [38]     | Not reported                                                                                         |
| Hall et al [34]           | Health records (physician diagnosis)                                                                 |
| Velentgas et al [37]      | Health records (physician diagnosis)                                                                 |
| Kurth et al (WHS) [21,22] | Questionnaire self-reporting symptoms                                                                |
| Kurth et al (PHS) [7,39]  | Questionnaire self-reporting symptoms                                                                |
| Gudmundsson et al [33]    | Questionnaire self-reporting symptoms                                                                |
| Kuo et al [35]            | Health records (physician diagnosis)                                                                 |
| Wang et al [32]           | Health records (physician diagnosis)                                                                 |
| Åsberg et al [5]          | Questionnaire self-reporting symptoms                                                                |
| Peng et al [36]           | Health records (physician diagnosis)                                                                 |
| Kurth et al (NHS) [12]    | Questionnaire about physician diagnosis                                                              |
| Androulakis et al [11]    | Questionnaire self-reporting symptoms                                                                |
| Rambarat et al [6]        | Questionnaire self-reporting symptoms                                                                |
| Lantz et al [41]          | Questionnaire self-reporting symptoms                                                                |

WHS: Women's Health Study, PHS: Physician's Health Study, NHS: Nurses' Health Study

**Supplemental Table 5:** Baseline patient characteristics of the included studies

| Study [Ref.]              | Age,% | Female,<br>% | Hypertension,<br>% | DM,%  | Hyperlipidemia,<br>% | Smoker,<br>% | BMI,<br>kg/m <sup>2</sup> | Aura,% |
|---------------------------|-------|--------------|--------------------|-------|----------------------|--------------|---------------------------|--------|
| Waters et al [8]          | NR/NR | 100/100      | NR/NR              | NR/NR | NR/NR                | NR/NR        | NR/NR                     | NR     |
| Sternfeld et al [40]      | 39/42 | 76/52        | NR/NR              | NR/NR | NR/NR                | 38/30        | 25/25                     | NR     |
| Merikangas et al [38]     | NR/NR | 84/58        | NR/NR              | NR/NR | NR/NR                | NR/NR        | NR/NR                     | NR     |
| Hall et al [34]           | NR/NR | NR/NR        | NR/NR              | NR/NR | NR/NR                | NR/NR        | NR/NR                     | NR     |
| Velentgas et al [37]      | 38/38 | 76/76        | 22/10              | 2/2   | 8/5                  | NR/NR        | NR/NR                     | NR     |
| Kurth et al (WHS) [21,22] | 54/55 | 100/100      | 27/25              | 2/3   | 3/3                  | 11/12        | 26/26                     | 28     |
| Kurth et al (PHS) [7,39]  | 57/58 | 0/0          | 34/31              | 3/4   | 11/10                | 6/7          | 25/25                     | NR     |
| Gudmundsson et al [33]    | 51/54 | 72/46        | 9/9                | 4/4   | NR/NR                | 48/48        | 25/26                     | 69     |
| Kuo et al [35]            | 43/43 | 70/70        | 16/12              | 6/6   | 8/5                  | NR/NR        | NR/NR                     | 8.8    |
| Wang et al [32]           | 32/32 | 71/71        | 3/3                | 1/1   | 2/2                  | NR/NR        | NR/NR                     | NR     |
| Åsberg et al [5]          | 44/53 | 72/47        | NR/NR              | NR/NR | NR/NR                | 31/25        | 26/26                     | 14     |
| Peng et al [36]           | 41/41 | 72/72        | 17/17              | 7/7   | 13/13                | NR/NR        | NR/NR                     | 12     |
| Kurth et al (NHS) [12]    | 35/34 | 100/100      | 9/5                | 1/1   | 15/10                | 15/13        | NR/NR                     | NR/NR  |
| Androulakis et al [11]    | 59/60 | 77/51        | 40/40              | 8/10  | 77/78                | 53/50        | NR/NR                     | 29     |
| Rambarat et al [6]        | 54/59 | 100/100      | 57/59              | 19/26 | 49/57                | 24/19        | NR/NR                     | NR/NR  |
| Lantz et al [41]          | 44/46 | 76/50        | 19/14              | 2/2   | 6/8                  | 18/18        | NR/NR                     | 41     |

Data is reported as Migraine/non-migraine arms.

DM: Diabetes Mellitus, BMI: Body mass index, CAD: Coronary artery disease, NR: Not reported

WHS: Women's Health Study, PHS: Physician's Health Study, NHS: Nurses' Health Study

1  
2  
3  
4  
5  
6  
7  
8  
9  
10  
11  
12  
13  
14  
15  
16  
17  
18  
19  
20  
21  
22  
23  
24  
25  
26  
27  
28  
29  
30  
31  
32  
33  
34  
35  
36  
37  
38  
39  
40  
41  
42  
43  
44  
45  
46  
47

**Supplemental Table 6:** Major adverse cardiac and cerebrovascular event definitions in included studies

| <b>Study [Ref.]</b>       | <b>Non-fatal stroke</b> | <b>Non-fatal myocardial infarction</b> | <b>Congestive heart failure</b> | <b>Death due to cardiovascular disease</b> |
|---------------------------|-------------------------|----------------------------------------|---------------------------------|--------------------------------------------|
| Kurth et al (WHS) [21,22] | X                       | X                                      |                                 | X                                          |
| Kurth et al (PHS) [7,39]  | X                       | X                                      |                                 | X                                          |
| Kurth et al (NHS) [12]    | X                       | X                                      |                                 | X                                          |
| Rambarat et al [6]        | X                       | X                                      | X                               | X                                          |

WHS: Women’s Health Study, PHS: Physician’s Health Study, NHS: Nurses’ Health Study

For peer review only

**Supplemental Table 7: GRADE assessment tool for quality of evidence**

| № of studies                                                                        | Quality assessment    |              |                          |              |             |                                                                         | Effect            |                    |                                                 | Quality      | Importance |
|-------------------------------------------------------------------------------------|-----------------------|--------------|--------------------------|--------------|-------------|-------------------------------------------------------------------------|-------------------|--------------------|-------------------------------------------------|--------------|------------|
|                                                                                     | Study design          | Risk of bias | Inconsistency            | Indirectness | Imprecision | Other considerations                                                    | № of events       | № of individuals   | HR (95% CI)                                     |              |            |
| <b>Major adverse cardiac and cerebrovascular event (follow up: mean 18.5 years)</b> |                       |              |                          |              |             |                                                                         |                   |                    |                                                 |              |            |
| 4                                                                                   | observational studies | not serious  | not serious <sup>a</sup> | not serious  | not serious | all plausible residual confounding would reduce the demonstrated effect | 332 <sup>b</sup>  | 24329 <sup>b</sup> | 1.42 per Adjusted HR (1.26 to 1.6) <sup>b</sup> | ⊕⊕⊕⊕<br>HIGH |            |
| <b>All-cause mortality (follow up: mean 4.9 years)</b>                              |                       |              |                          |              |             |                                                                         |                   |                    |                                                 |              |            |
| 6                                                                                   | observational studies | not serious  | not serious <sup>a</sup> | not serious  | not serious | all plausible residual confounding would reduce the demonstrated effect | 2695 <sup>b</sup> | 203669             | 0.93 per Adjusted HR (0.78 to 1.1)              | ⊕⊕⊕⊕<br>HIGH |            |
| <b>cardiovascular mortality (follow up: mean 9.3 years)</b>                         |                       |              |                          |              |             |                                                                         |                   |                    |                                                 |              |            |
| 9                                                                                   | observational studies | not serious  | not serious <sup>a</sup> | not serious  | not serious | all plausible residual confounding would reduce the demonstrated effect | 904 <sup>b</sup>  | 226621             | 1.04 per adjusted HR (0.89 to 1.23)             | ⊕⊕⊕⊕<br>HIGH |            |
| <b>Myocardial infarction (follow up: mean 8.8 years)</b>                            |                       |              |                          |              |             |                                                                         |                   |                    |                                                 |              |            |
| 7                                                                                   | observational studies | not serious  | not serious <sup>a</sup> | not serious  | not serious | all plausible residual confounding would reduce the demonstrated effect | 787 <sup>b</sup>  | 229456             | 1.23 per adjusted HR (1.03 to 1.43)             | ⊕⊕⊕⊕<br>HIGH |            |
| <b>Stroke (follow up: mean 5.8 years)</b>                                           |                       |              |                          |              |             |                                                                         |                   |                    |                                                 |              |            |
| 13                                                                                  | observational studies | not serious  | not serious <sup>a</sup> | not serious  | not serious | all plausible residual confounding would reduce the demonstrated effect | 1972 <sup>b</sup> | 386483             | 1.42 per adjusted HR (1.25 to 1.61)             | ⊕⊕⊕⊕<br>HIGH |            |

a. As the heterogeneity was explained by our subgroup analysis and meta-regression.

b. Nurse's Health Study did not report number of events separately in each group



**Supplemental Table 8:** Assessment of the outcome of stroke among the included studies

| <b>Study [Ref.]</b>       | <b>Assessment of the outcome of stroke</b>                                                     |
|---------------------------|------------------------------------------------------------------------------------------------|
| Merikangas et al [38]     | Self-reported physician diagnosis of the condition                                             |
| Hall et al [34]           | Identification with ICD-9 codes                                                                |
| Velentgas et al [37]      | Identification with ICD-9 codes                                                                |
| Kurth et al (WHS) [21,22] | Self-reported on follow up questionnaires then confirmed by medical record review by physician |
| Kurth et al (PHS) [7,39]  | Follow up questionnaires then confirmed by medical records review                              |
| Gudmundsson et al [33]    | Identification with ICD-9 and 10 codes                                                         |
| Kuo et al [35]            | Identification with ICD-9 codes                                                                |
| Wang et al [32]           | Identification with ICD-9 codes                                                                |
| Åsberg et al [5]          | Identification with ICD-10 codes                                                               |
| Peng et al [36]           | Hospitalizations claims (accuracy validated prior study to be 94%)                             |
| Kurth et al (NHS) [12]    | Self-reported on follow up questionnaires then confirmed by medical record review by physician |
| Androulakis et al [11]    | Reviewing reports of CT or MRI brain imaging                                                   |
| Rambarat et al [6]        | Follow up phone interviews, and confirmed by reaching the referring physician.                 |
| Lantz et al [41]          | Identification with ICD-9 codes                                                                |

ICD: International Classification of Disease, WHS: Women's Health Study, PHS: Physician's Health Study, NHS: Nurses' Health Study

**Supplemental Table 9:** Myocardial infarction definitions in included studies.

| <b>Study [Ref.]</b>       | <b>Definition of myocardial infarction</b>                                                                                                           |
|---------------------------|------------------------------------------------------------------------------------------------------------------------------------------------------|
| Sternfeld et al [40]      | Identification with ICD-9 codes                                                                                                                      |
| Hall et al [34]           | Identification with ICD-9 codes                                                                                                                      |
| Velentgas et al [37]      | Identification with ICD-9 codes                                                                                                                      |
| Kurth et al (WHS) [21,22] | Occurrence of typical symptoms by World Health Organization definition, in addition to diagnostic electrocardiographic or cardiac enzymes elevation. |
| Kurth et al (PHS) [7,39]  | Occurrence of typical symptoms by World Health Organization definition, in addition to diagnostic electrocardiographic or cardiac enzymes elevation. |
| Kurth et al (NHS) [12]    | Occurrence of typical symptoms by World Health Organization definition, in addition to diagnostic electrocardiographic or cardiac enzymes elevation. |
| Rambarat et al [6]        | Asking patients about MI diagnosis, then confirming by contacting the referring physician or obtaining health records                                |

ICD: International Classification of Disease, WHS: Women's Health Study, PHS: Physician's Health Study, NHS: Nurses' Health Study

**Supplemental Figure 1:** Funnel plot of major adverse cardiac and cerebrovascular events (MACCE)

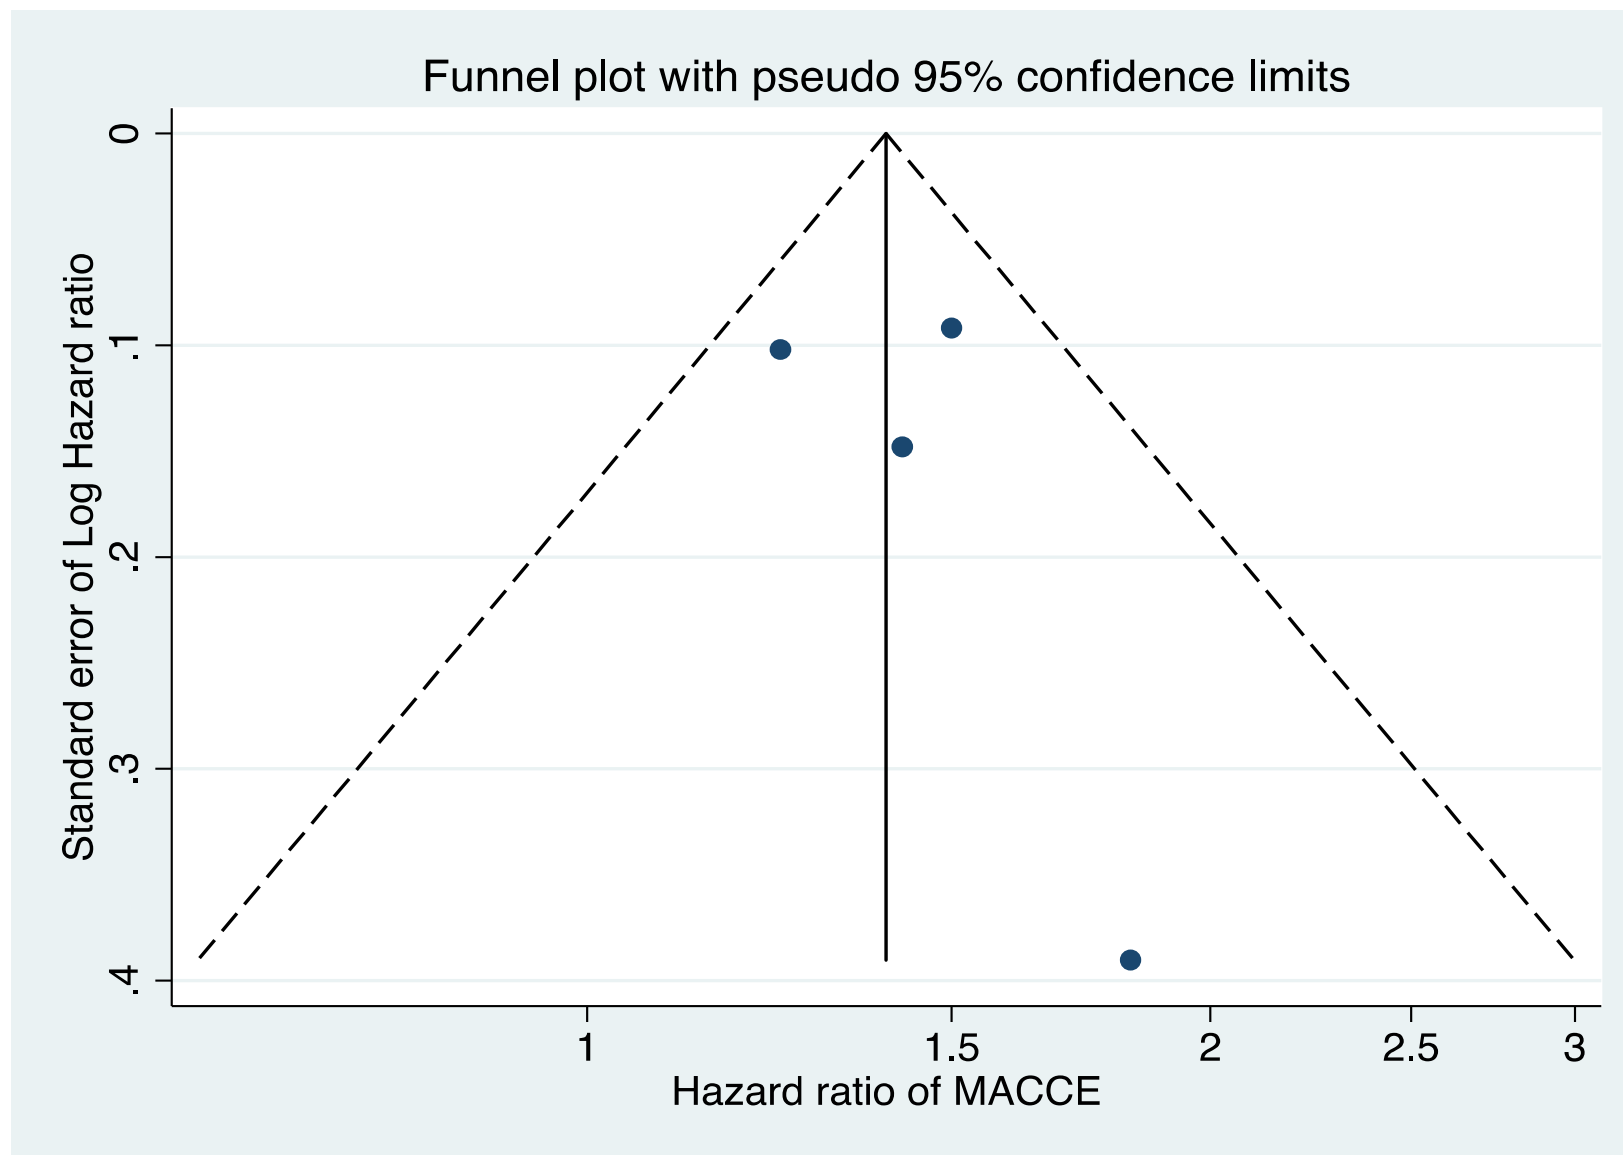

**Supplemental Figure 2:** Random effects summary adjusted hazard ratio of major adverse cardiovascular and cerebrovascular events

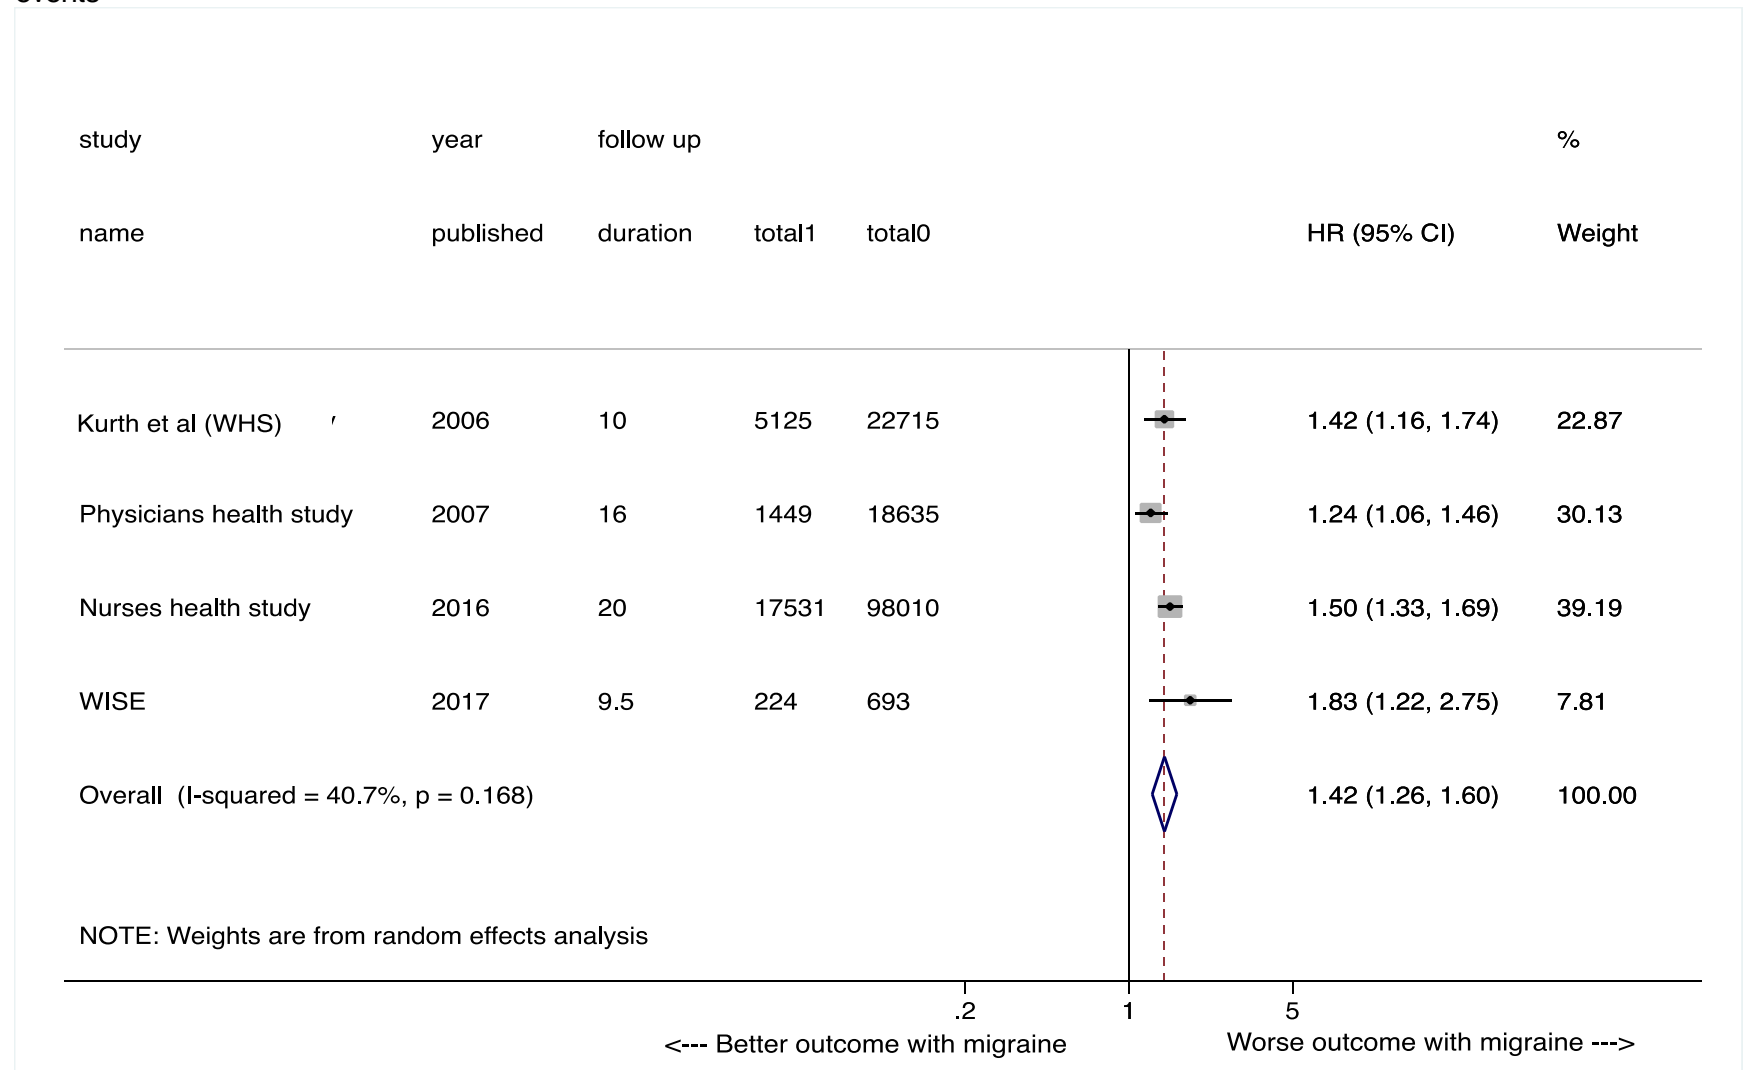

**Supplemental Figure 3:** Random effects meta-regression analysis of major adverse cardiac and cerebrovascular events by the duration of follow-up of each study

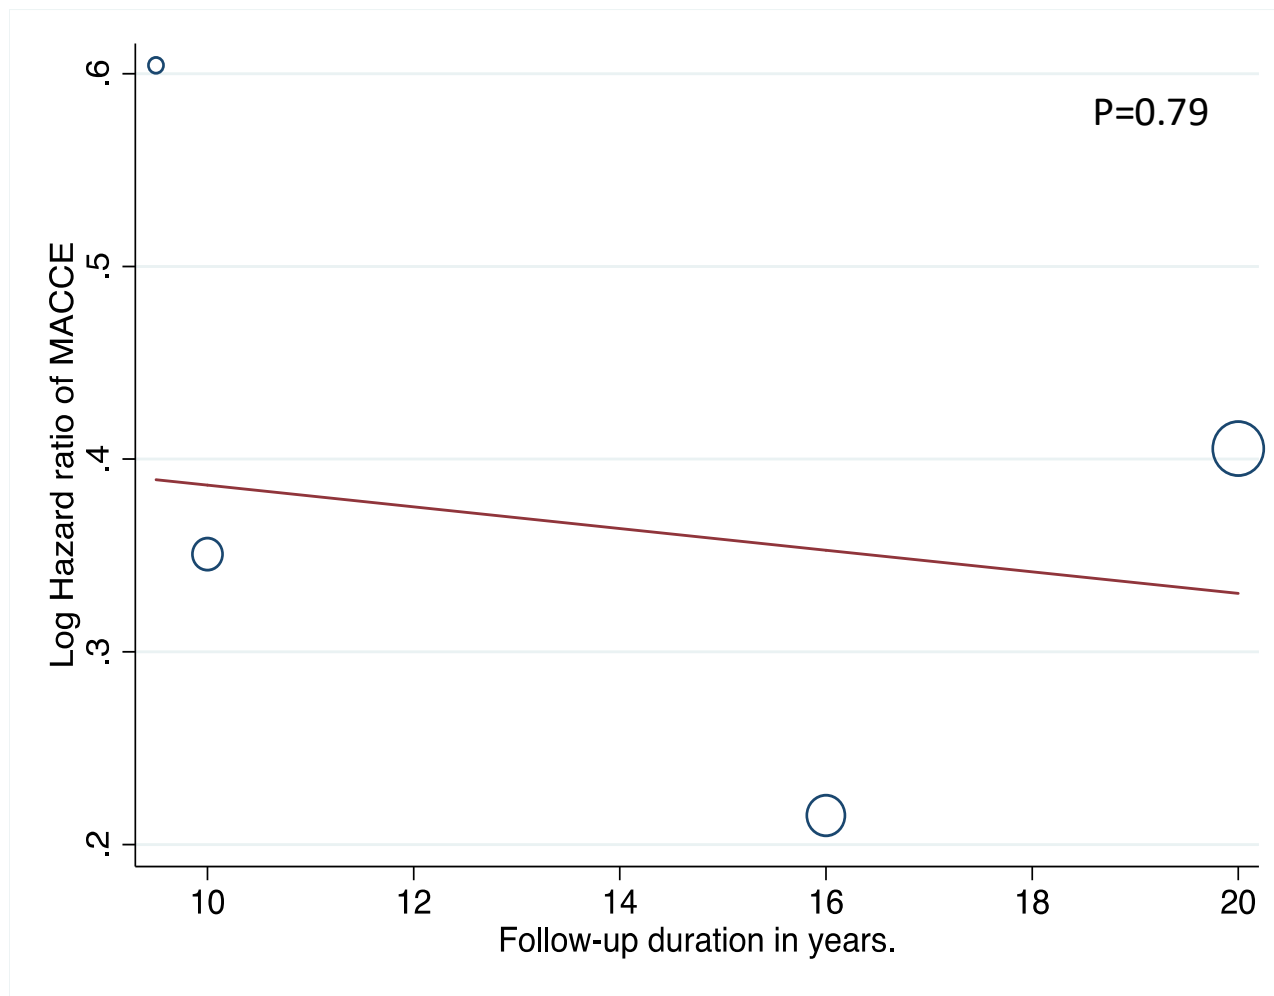

Supplemental Figure 4: Funnel plot of stroke

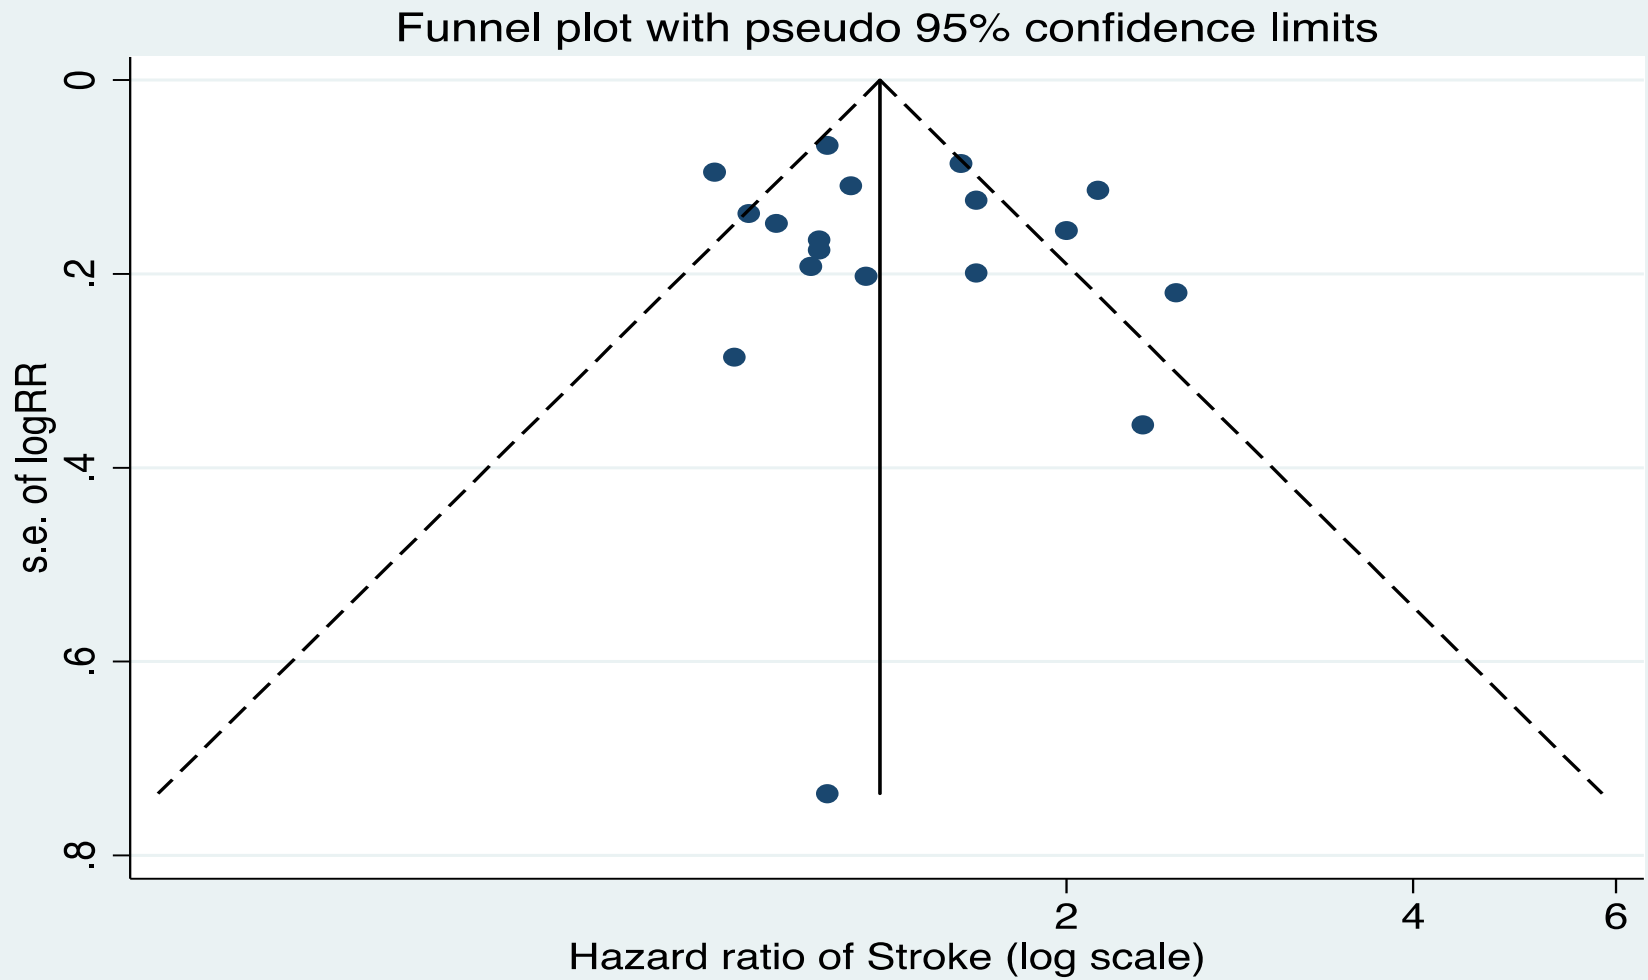

**Supplemental Figure 5:** Random effects meta-regression analysis of stroke by the duration of follow-up of each study

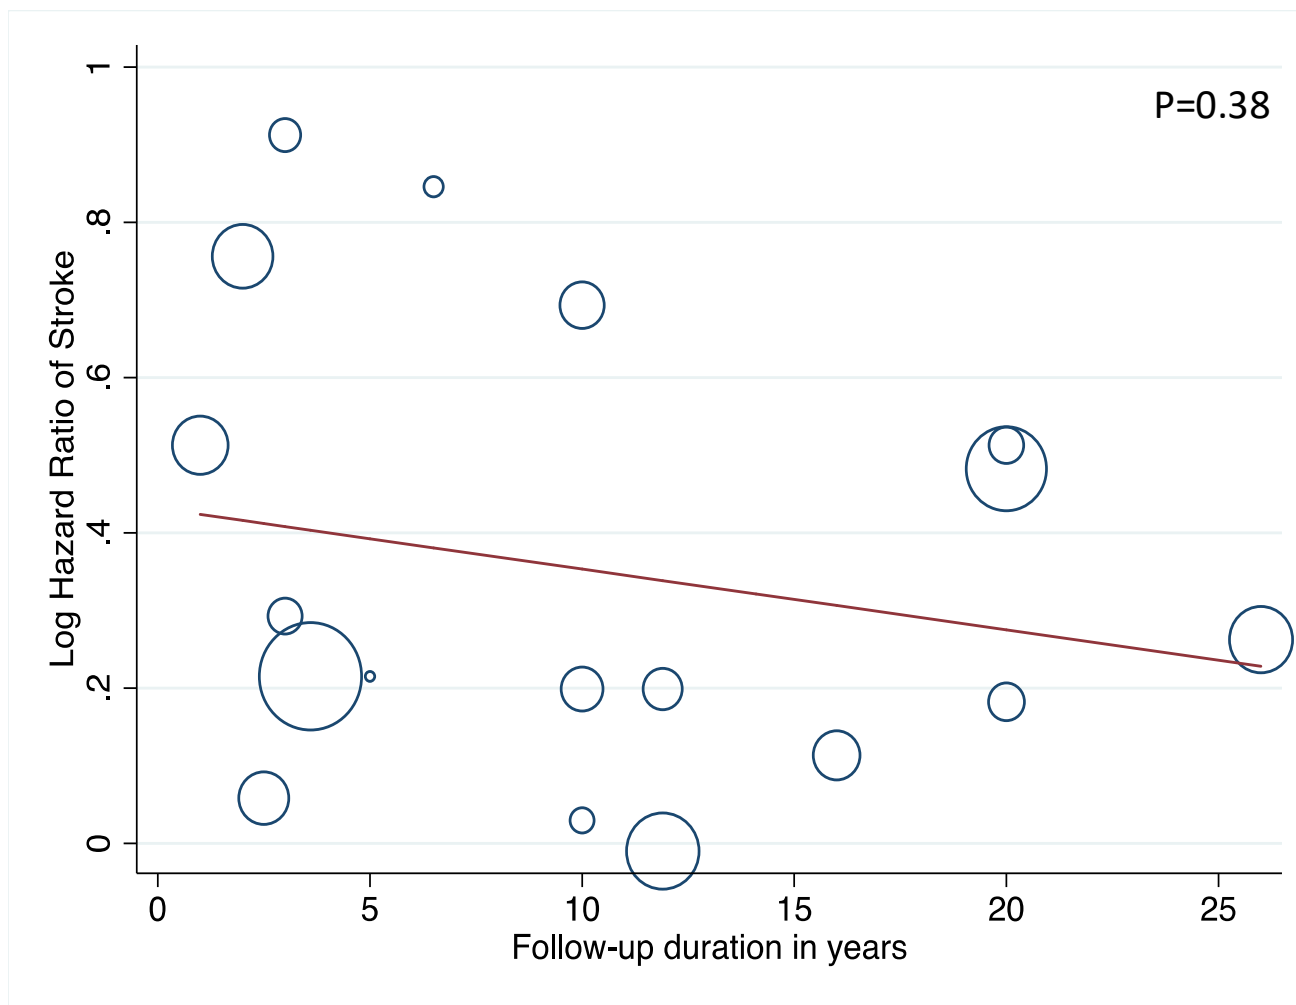

Supplemental Figure 6: Funnel plot of myocardial infarction.

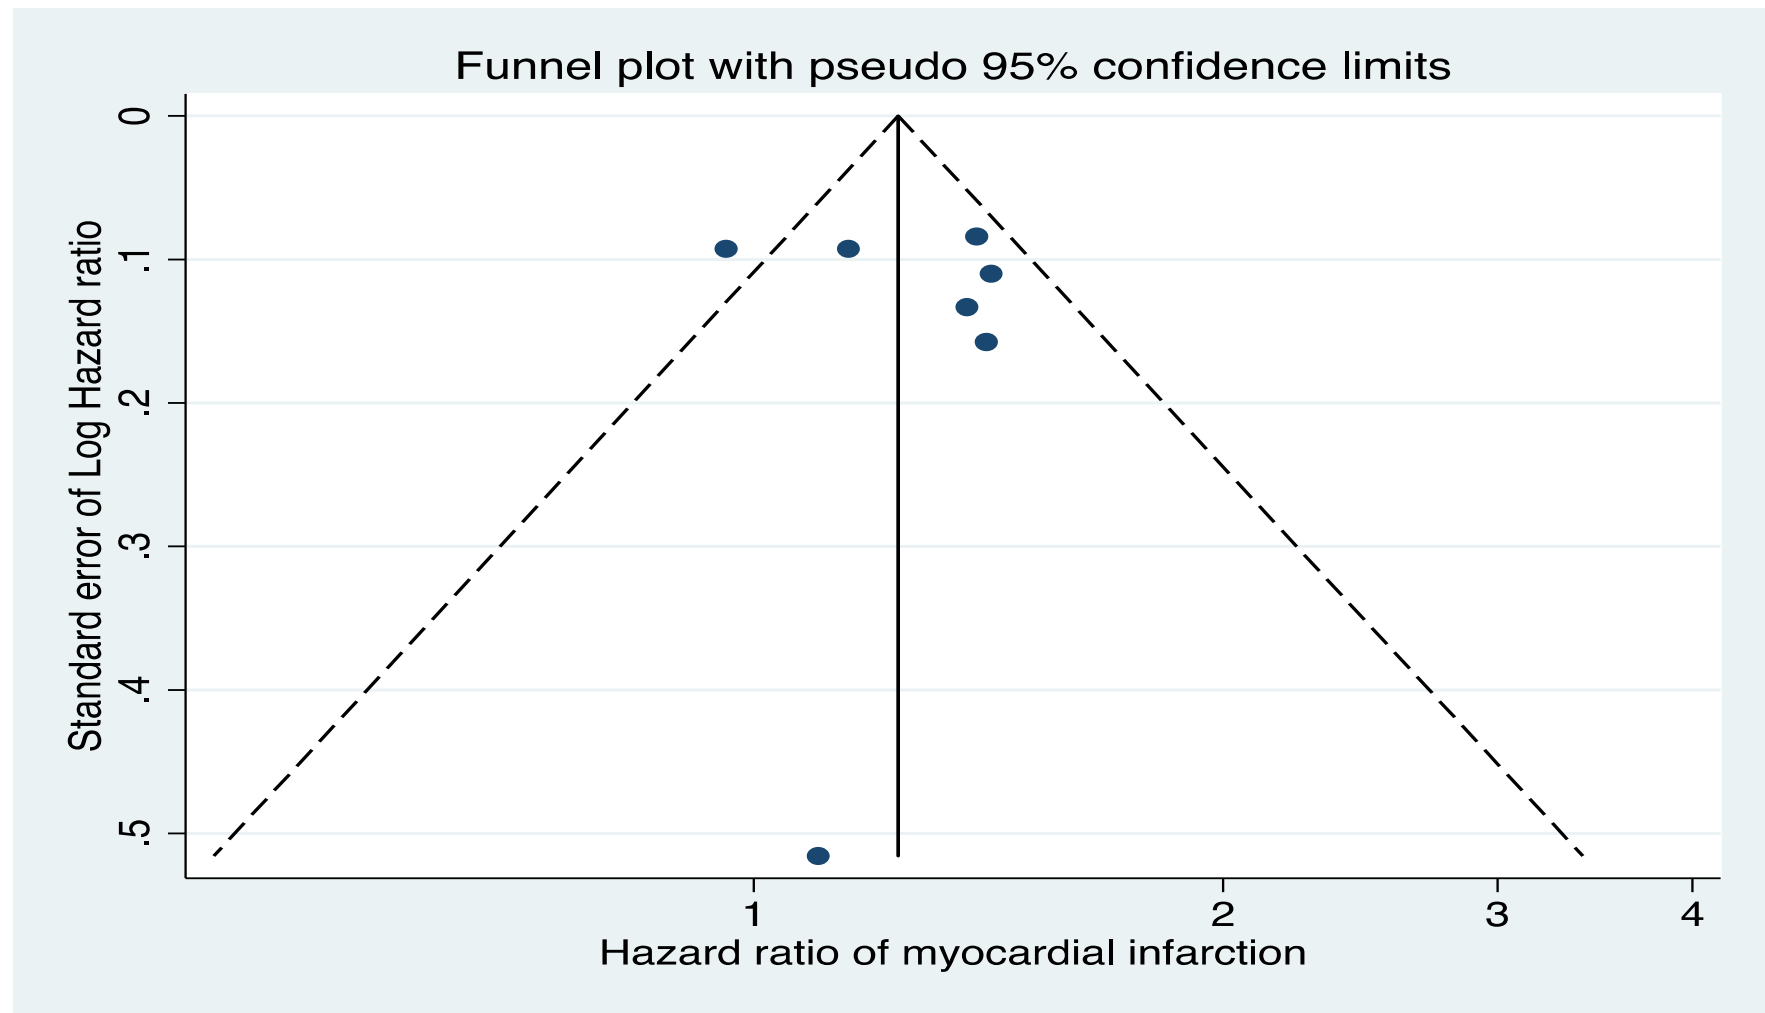

**Supplemental Figure 7:** Random effects summary adjusted hazard ratio of myocardial infarction.

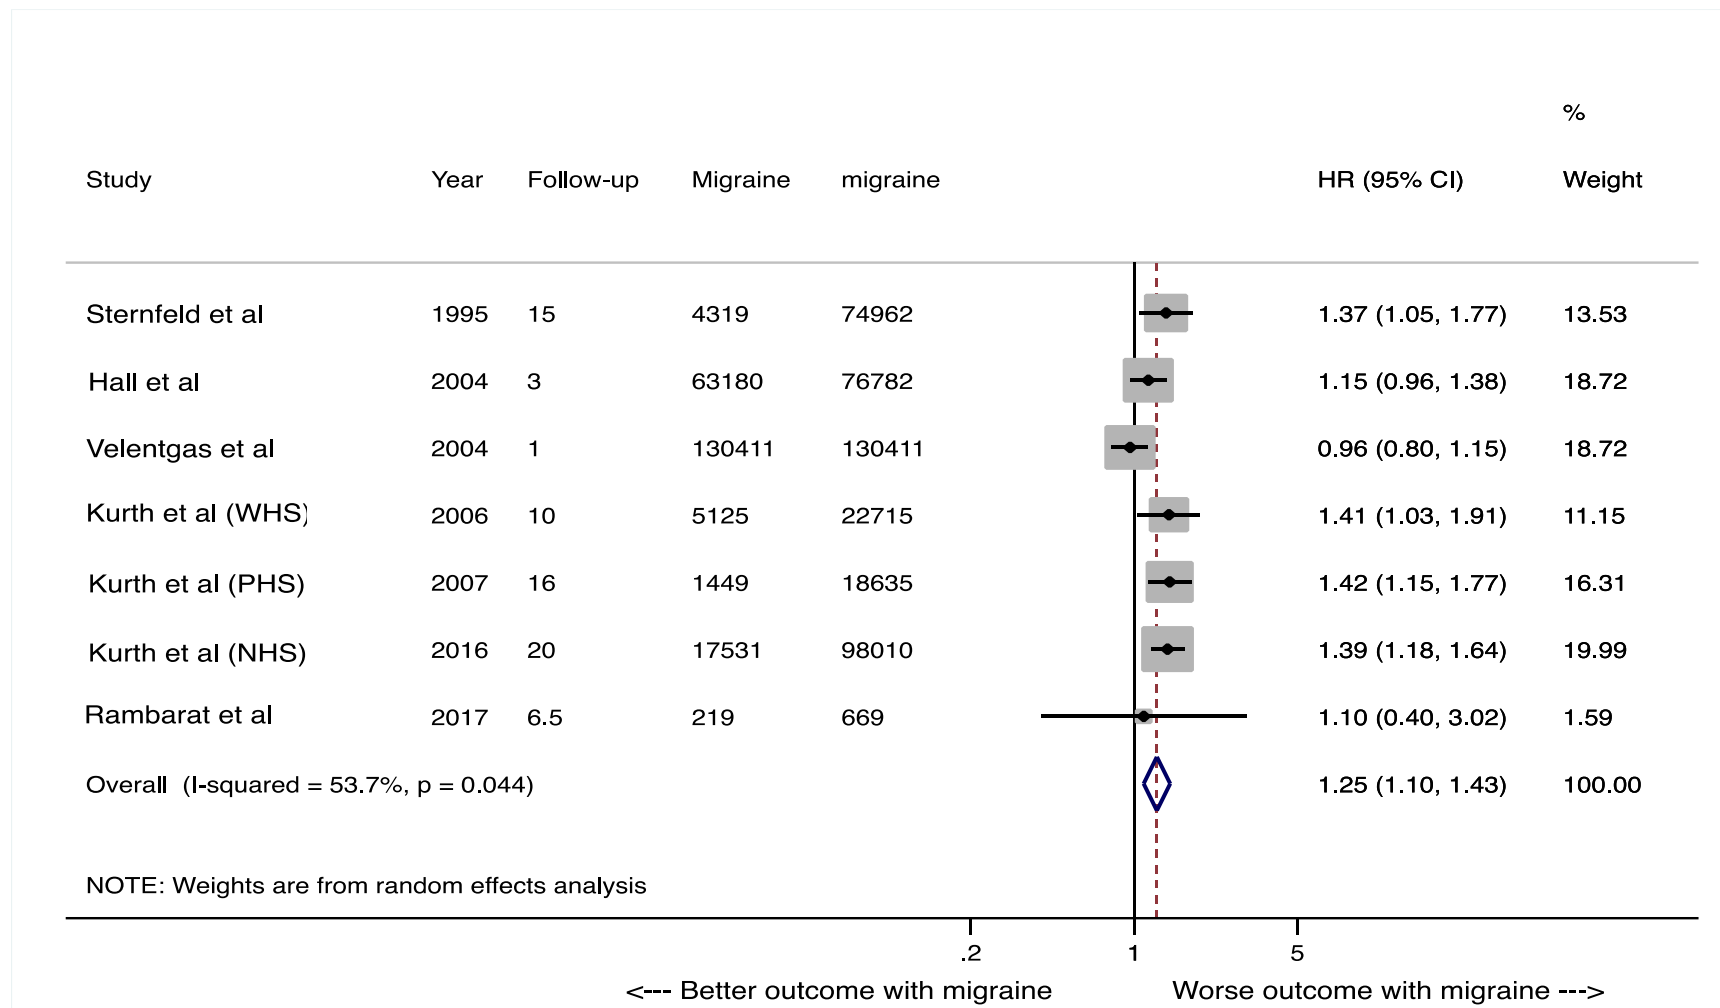



1  
2  
3  
4  
5  
6  
7  
8  
9  
10  
11  
12  
13  
14  
15  
16  
17  
18  
19  
20  
21  
22  
23  
24  
25  
26  
27  
28  
29  
30  
31  
32  
33  
34  
35  
36  
37  
38  
39  
40  
41  
42  
43  
44  
45  
46  
47

**Supplemental Figure 8:** Random effects meta-regression analysis of myocardial infarction by the duration of follow-up of each study

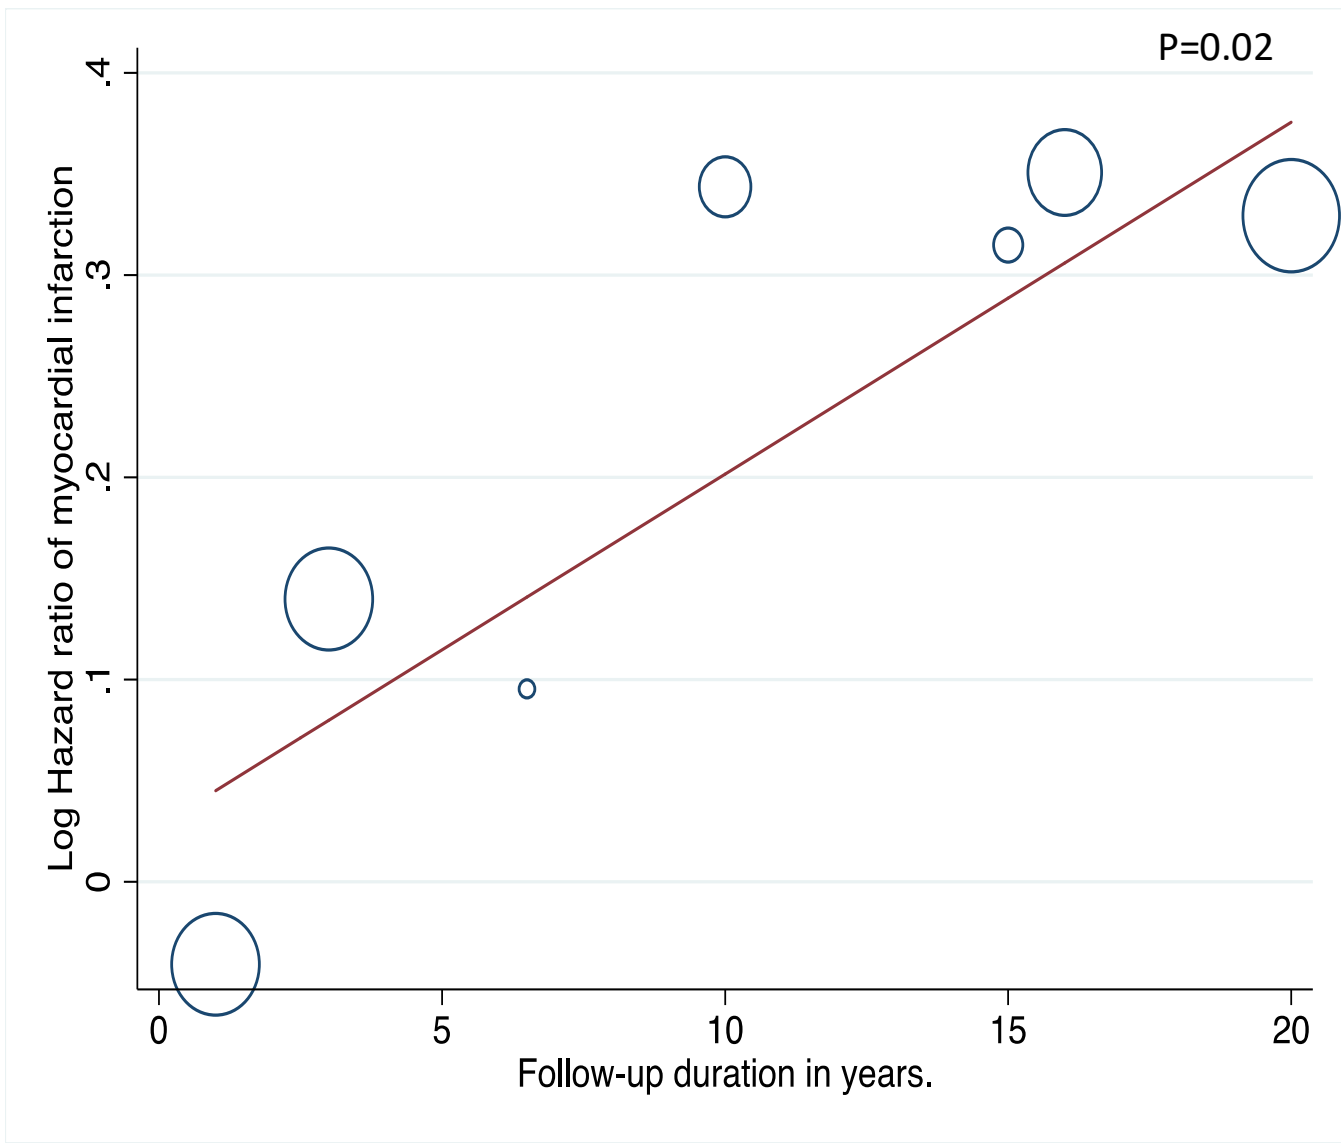

Supplemental Figure 9: Funnel plot of all-cause mortality.

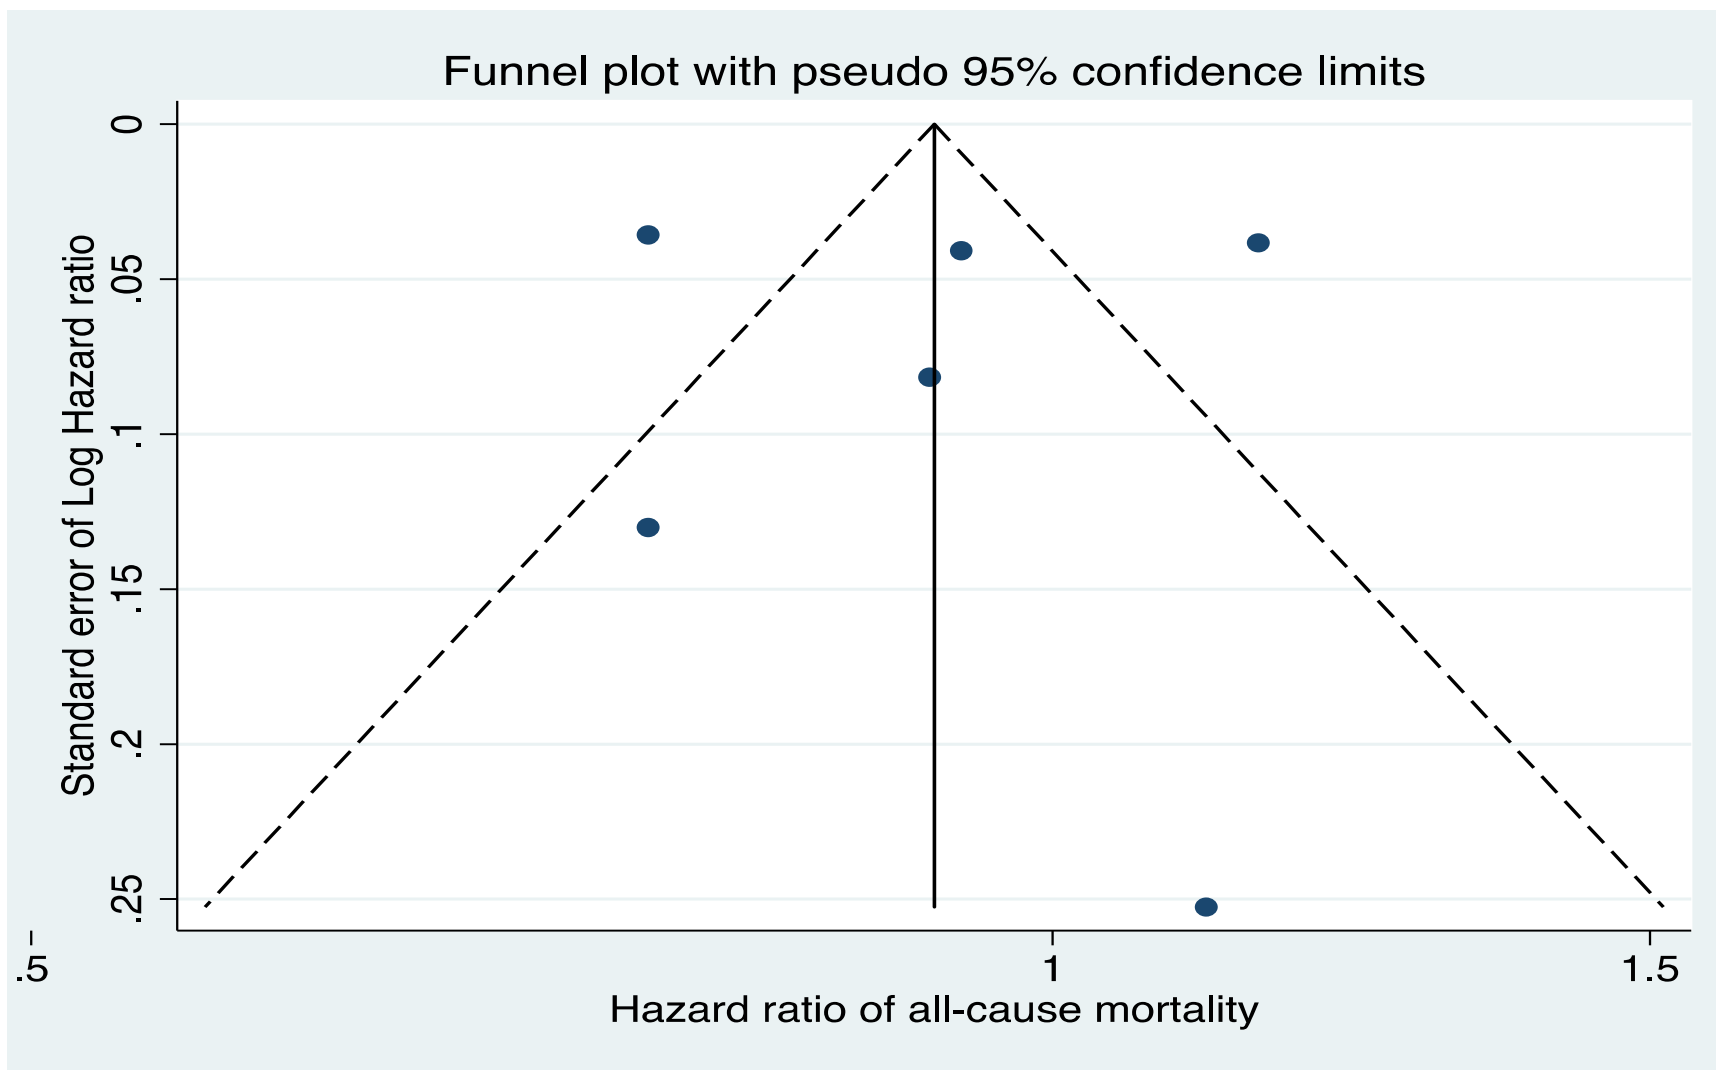

Supplemental Figure 10: Random effects summary adjusted hazard ratio of all-cause mortality.

1  
2  
3  
4  
5  
6  
7  
8  
9  
10  
11  
12  
13  
14  
15  
16  
17  
18  
19  
20  
21  
22  
23  
24  
25  
26  
27  
28  
29  
30  
31  
32  
33  
34  
35  
36  
37  
38  
39  
40  
41  
42  
43  
44  
45  
46  
47

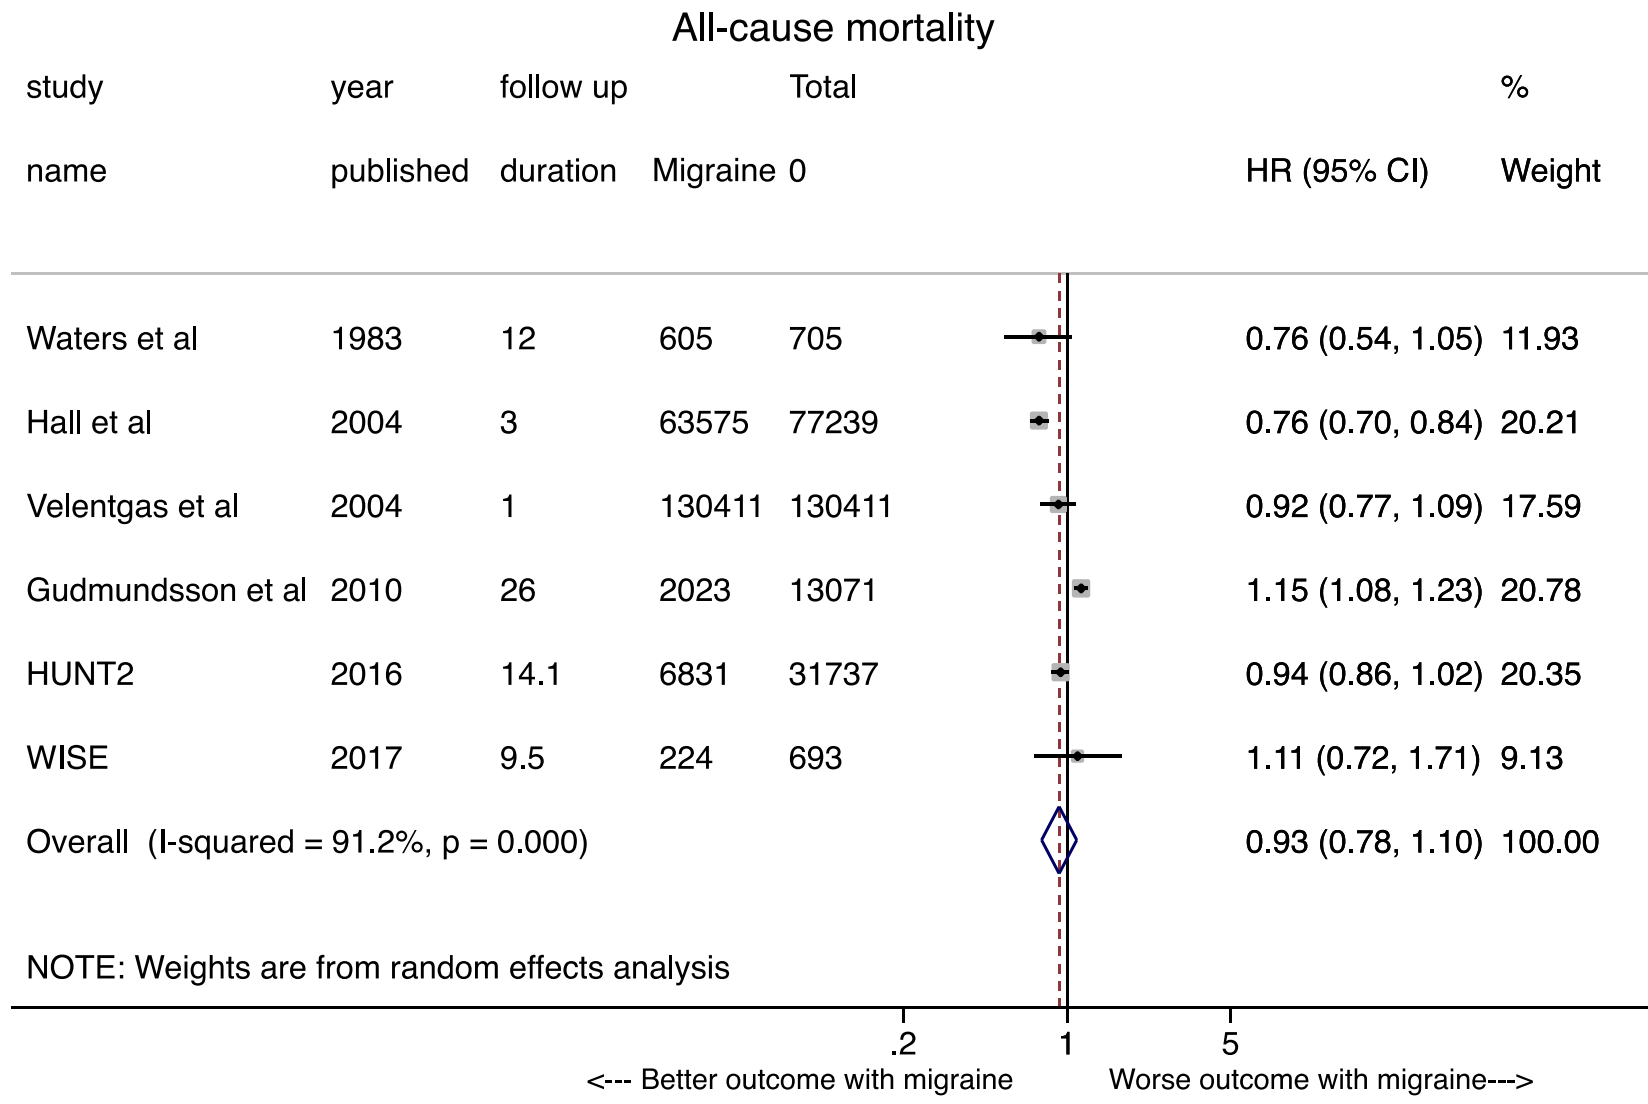

**Supplemental Figure 11:** Random effects meta-regression analysis of all-cause mortality by the duration of follow-up of each study

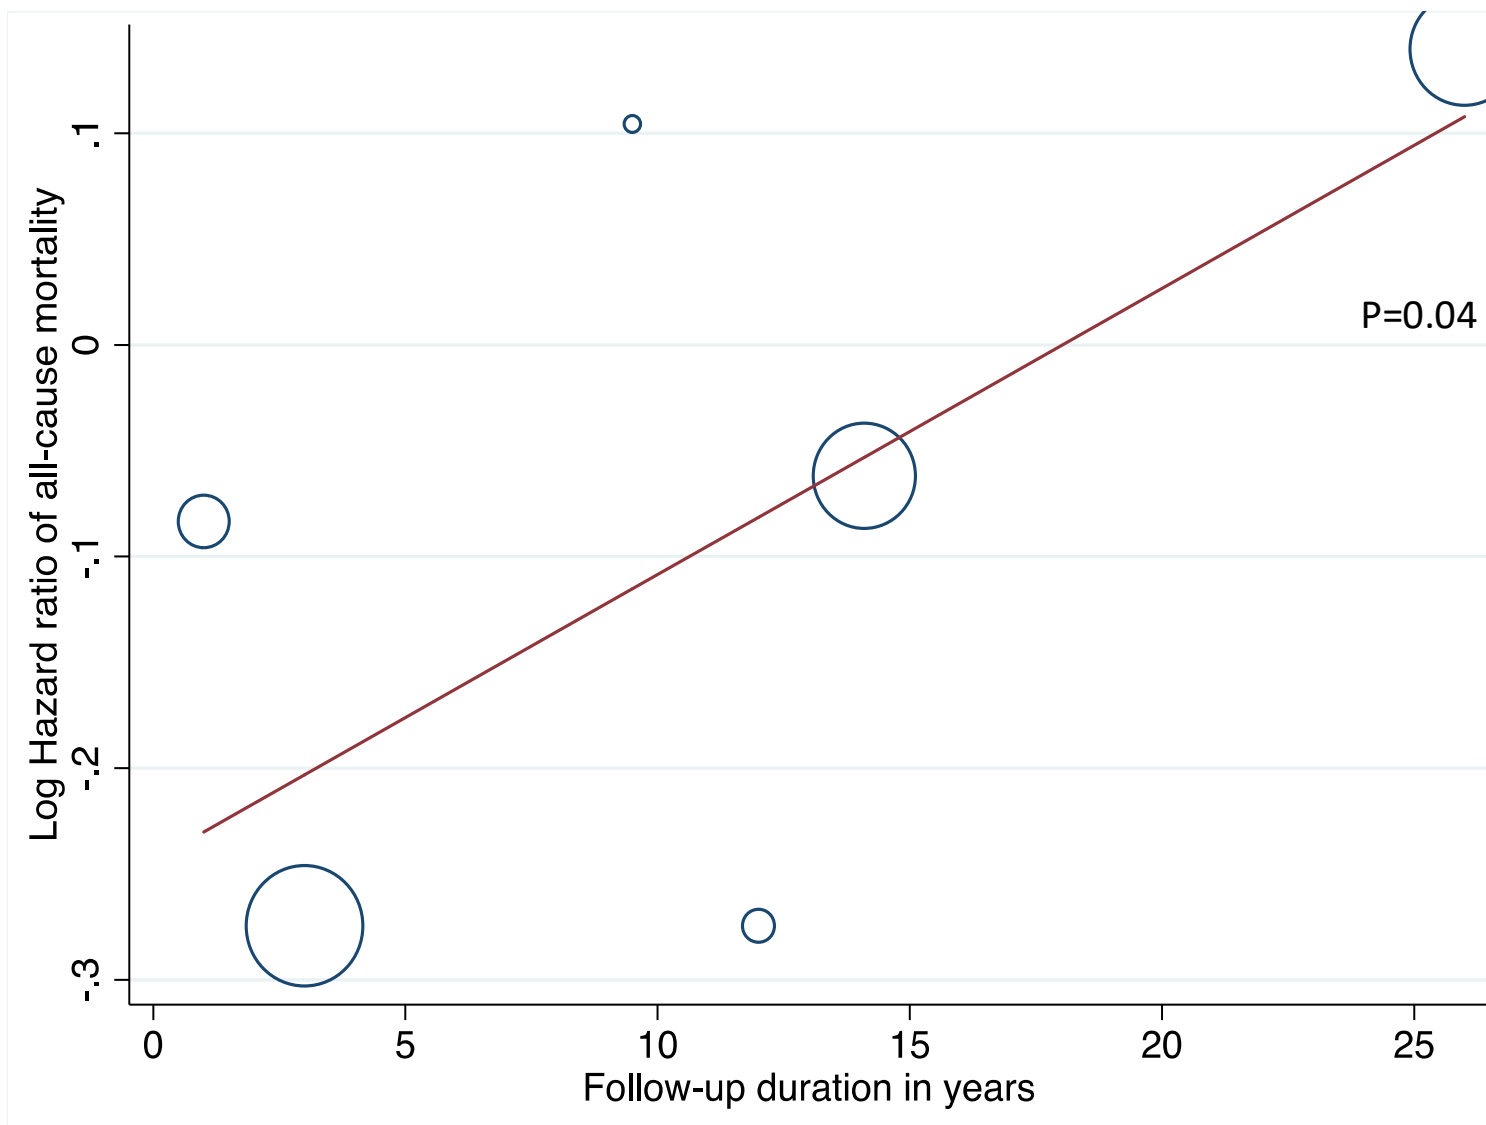

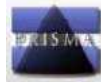

# PRISMA 2009 Checklist

| Section/topic                      | #  | Checklist item                                                                                                                                                                                                                                                                                              | Reported on page # |
|------------------------------------|----|-------------------------------------------------------------------------------------------------------------------------------------------------------------------------------------------------------------------------------------------------------------------------------------------------------------|--------------------|
| <b>TITLE</b>                       |    |                                                                                                                                                                                                                                                                                                             |                    |
| Title                              | 1  | Identify the report as a systematic review, meta-analysis, or both.                                                                                                                                                                                                                                         | 1                  |
| <b>ABSTRACT</b>                    |    |                                                                                                                                                                                                                                                                                                             |                    |
| Structured summary                 | 2  | Provide a structured summary including, as applicable: background; objectives; data sources; study eligibility criteria, participants, and interventions; study appraisal and synthesis methods; results; limitations; conclusions and implications of key findings; systematic review registration number. | 2                  |
| <b>INTRODUCTION</b>                |    |                                                                                                                                                                                                                                                                                                             |                    |
| Rationale                          | 3  | Describe the rationale for the review in the context of what is already known.                                                                                                                                                                                                                              | 4                  |
| Objectives                         | 4  | Provide an explicit statement of questions being addressed with reference to participants, interventions, comparisons, outcomes, and study design (PICOS).                                                                                                                                                  | 4                  |
| <b>METHODS</b>                     |    |                                                                                                                                                                                                                                                                                                             |                    |
| Protocol and registration          | 5  | Indicate if a review protocol exists, if and where it can be accessed (e.g., Web address), and, if available, provide registration information including registration number.                                                                                                                               | 4                  |
| Eligibility criteria               | 6  | Specify study characteristics (e.g., PICOS, length of follow-up) and report characteristics (e.g., years considered, language, publication status) used as criteria for eligibility, giving rationale.                                                                                                      | 5                  |
| Information sources                | 7  | Describe all information sources (e.g., databases with dates of coverage, contact with study authors to identify additional studies) in the search and date last searched.                                                                                                                                  | 4                  |
| Search                             | 8  | Present full electronic search strategy for at least one database, including any limits used, such that it could be repeated.                                                                                                                                                                               | Figure 1           |
| Study selection                    | 9  | State the process for selecting studies (i.e., screening, eligibility, included in systematic review, and, if applicable, included in the meta-analysis).                                                                                                                                                   | 5                  |
| Data collection process            | 10 | Describe method of data extraction from reports (e.g., piloted forms, independently, in duplicate) and any processes for obtaining and confirming data from investigators.                                                                                                                                  | 4,5                |
| Data items                         | 11 | List and define all variables for which data were sought (e.g., PICOS, funding sources) and any assumptions and simplifications made.                                                                                                                                                                       | 5                  |
| Risk of bias in individual studies | 12 | Describe methods used for assessing risk of bias of individual studies (including specification of whether this was done at the study or outcome level), and how this information is to be used in any data synthesis.                                                                                      | 5,6                |
| Summary measures                   | 13 | State the principal summary measures (e.g., risk ratio, difference in means).                                                                                                                                                                                                                               | 6                  |
| Synthesis of results               | 14 | Describe the methods of handling data and combining results of studies, if done, including measures of consistency (e.g., $I^2$ ) for each meta-analysis.                                                                                                                                                   | 6                  |

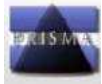

# PRISMA 2009 Checklist

Page 1 of 2

| Section/topic                 | #  | Checklist item                                                                                                                                                                                           | Reported on page #                   |
|-------------------------------|----|----------------------------------------------------------------------------------------------------------------------------------------------------------------------------------------------------------|--------------------------------------|
| Risk of bias across studies   | 15 | Specify any assessment of risk of bias that may affect the cumulative evidence (e.g., publication bias, selective reporting within studies).                                                             | 6                                    |
| Additional analyses           | 16 | Describe methods of additional analyses (e.g., sensitivity or subgroup analyses, meta-regression), if done, indicating which were pre-specified.                                                         | 6                                    |
| <b>RESULTS</b>                |    |                                                                                                                                                                                                          |                                      |
| Study selection               | 17 | Give numbers of studies screened, assessed for eligibility, and included in the review, with reasons for exclusions at each stage, ideally with a flow diagram.                                          | 7                                    |
| Study characteristics         | 18 | For each study, present characteristics for which data were extracted (e.g., study size, PICOS, follow-up period) and provide the citations.                                                             | 7, Table 1                           |
| Risk of bias within studies   | 19 | Present data on risk of bias of each study and, if available, any outcome level assessment (see item 12).                                                                                                | Supplemental Table 2                 |
| Results of individual studies | 20 | For all outcomes considered (benefits or harms), present, for each study: (a) simple summary data for each intervention group (b) effect estimates and confidence intervals, ideally with a forest plot. | Figures 2-4<br>Supplemental Figures  |
| Synthesis of results          | 21 | Present results of each meta-analysis done, including confidence intervals and measures of consistency.                                                                                                  | 7-10, Figures 2-4                    |
| Risk of bias across studies   | 22 | Present results of any assessment of risk of bias across studies (see Item 15).                                                                                                                          | Supplemental Tables 1 & 7            |
| Additional analysis           | 23 | Give results of additional analyses, if done (e.g., sensitivity or subgroup analyses, meta-regression [see Item 16]).                                                                                    | Figures 3,4;<br>Supplemental Figures |
| <b>DISCUSSION</b>             |    |                                                                                                                                                                                                          |                                      |
| Summary of evidence           | 24 | Summarize the main findings including the strength of evidence for each main outcome; consider their relevance to key groups (e.g., healthcare providers, users, and policy makers).                     | 10                                   |
| Limitations                   | 25 | Discuss limitations at study and outcome level (e.g., risk of bias), and at review-level (e.g., incomplete retrieval of identified research, reporting bias).                                            | 13                                   |
| Conclusions                   | 26 | Provide a general interpretation of the results in the context of other evidence, and implications for future research.                                                                                  | 14                                   |
| <b>FUNDING</b>                |    |                                                                                                                                                                                                          |                                      |



# PRISMA 2009 Checklist

1  
2  
3  
4  
5  
6  
7  
8  
9  
10  
11  
12  
13  
14  
15  
16  
17  
18  
19  
20  
21  
22  
23  
24  
25  
26  
27  
28  
29  
30  
31  
32  
33  
34  
35  
36  
37  
38  
39  
40  
41  
42  
43  
44  
45  
46  
47

|         |    |                                                                                                                                            |    |
|---------|----|--------------------------------------------------------------------------------------------------------------------------------------------|----|
| Funding | 27 | Describe sources of funding for the systematic review and other support (e.g., supply of data); role of funders for the systematic review. | 14 |
|---------|----|--------------------------------------------------------------------------------------------------------------------------------------------|----|

From: Moher D, Liberati A, Tetzlaff J, Altman DG, The PRISMA Group (2009). Preferred Reporting Items for Systematic Reviews and Meta-Analyses: The PRISMA Statement. PLoS Med 6(7): e1000097. doi:10.1371/journal.pmed1000097

For more information, visit: [www.prisma-statement.org](http://www.prisma-statement.org).

Page 2 of 2

For peer review only
